# Supplementary material
Source: PubMed Central journal article supplement (PMC3740977)
Supplement: NIHMS493097-supplement-Supporting_Information.pdf [file NIHMS493097-supplement-Supporting_Information.pdf]

**Supporting Information:**  
**Mechanistic Insights into the Hydrolysis of Organophosphorus  
Compounds by Paraoxonase 1: Exploring the Limits of Selectivity of a  
Promiscuous Enzyme**

Sivaramakrishnan Muthukrishnan,<sup>1</sup> Vivekanand S. Shete,<sup>1</sup> Toby. T. Sanan,<sup>1,1</sup>  
Shameema Oottikkal,<sup>1</sup> Lauren M. Porter,<sup>1</sup> Thomas J. Magliery\*<sup>1,2</sup>, Christopher M.  
Hadad\*<sup>1</sup>

Departments of Chemistry<sup>1</sup> and Biochemistry<sup>2</sup>, The Ohio State University, 100 W. 18<sup>th</sup>  
Avenue, Columbus, Ohio 43210

\*To whom correspondence should be addressed:

TJM: magliery@chemistry.ohio-state.edu, phone (614) 247-8425

CMH: hadad.1@osu.edu, phone (614) 688-3141

**Table of Contents**

|                                                                                          |         |
|------------------------------------------------------------------------------------------|---------|
| 1. General synthetic procedures for OP substrates and inhibitors                         | S2      |
| 2. Complete Library of ligands studied                                                   | S2-S4   |
| 3. <sup>1</sup> H NMR, <sup>13</sup> C NMR, IR spectroscopic and Mass Spectrometric data | S4-S48  |
| 4. Results of Enzyme Kinetics                                                            | S49-S50 |
| 5. Selected Poses from docking of ligands in G2E6                                        | S50-S54 |
| 6. Selected Poses from MD simulations of ligand-G2E6 complex                             | S54-S60 |
| 7. Thermochemistry for the hydrolysis of ligands (without enzyme)                        | S61-S62 |
| 8. References                                                                            | S62-S63 |

## 1. General synthetic procedures for OP substrates and Inhibitors:

The general reaction for the preparation of the photoaffinity labels (PAL-Group ID) was the addition of a phosphoryl dichloridate (1 equivalent) to the corresponding alcohol (1 equivalent) in the presence of toluene at 0°C. A solution of triethylamine (1 equivalent) in toluene was added dropwise, and the reaction was brought to room temperature and stirred overnight. The reaction mixture was filtered and the supernatant was evaporated. The solid residue was then re-suspended in dry acetone. Upon cooling the mixture to 0°C, sodium azide (1 equivalent) was added and the reaction was stirred for 8 hours. The reaction mixture was filtered, and the solvent was evaporated. The crude product was purified by silica gel column chromatography (hexane:ethyl acetate 80:20 as the eluent). Compounds were obtained in 40–80% yield. The purified compounds were analyzed by IR, <sup>1</sup>H and <sup>13</sup>C NMR as well as HRMS.

The general reaction for the formation of the SAR substrates/inhibitors was the addition of a phosphoryl dichloridate (1 equivalent) to the corresponding alcohol (2 equivalents) in the presence of toluene at 0°C. A solution of triethylamine (2 equivalents) in toluene was added dropwise, and the reaction was stirred at room temperature overnight. The reaction mixture was filtered, and the solvent was then evaporated. The crude product was purified by silica gel column chromatography (hexane:ethyl acetate 80:20 as the eluent). Compounds were isolated in 50–80% yield. The purified compounds were analyzed by IR, <sup>1</sup>H and <sup>13</sup>C NMR as well as HRMS.

## 2. Complete Library of ligands studied

Compounds A-P were also synthesized and screened; since they had no hydrolytic activity against G2E6 PON1, these molecules were not discussed in the manuscript.

### Group I

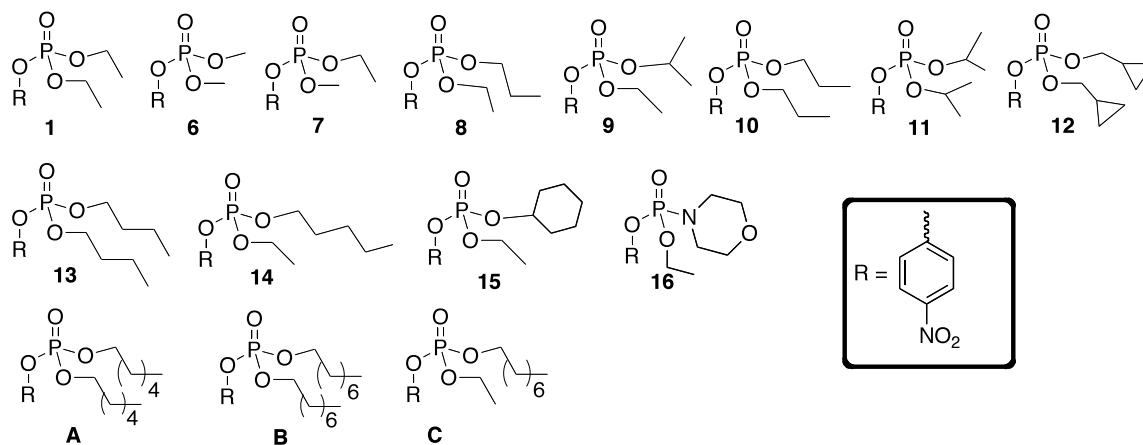

## Group II

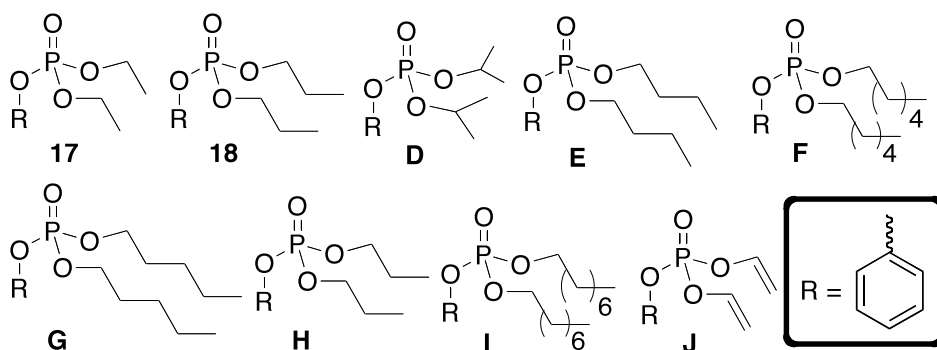

## Group III

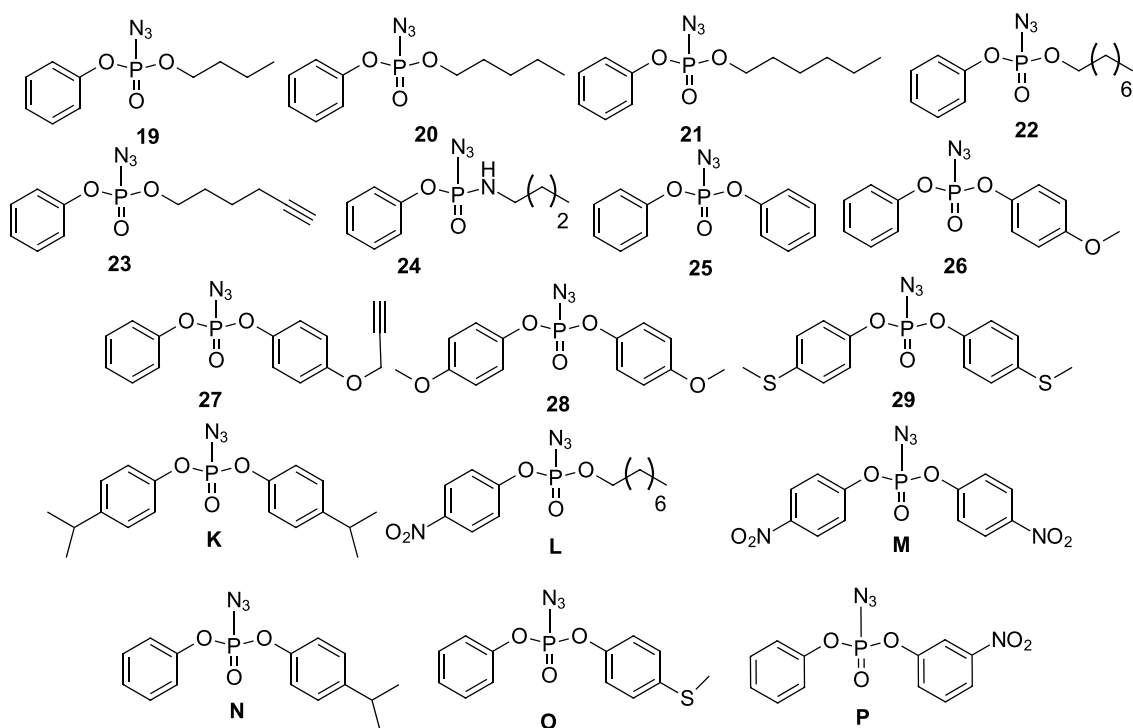

### Group IV

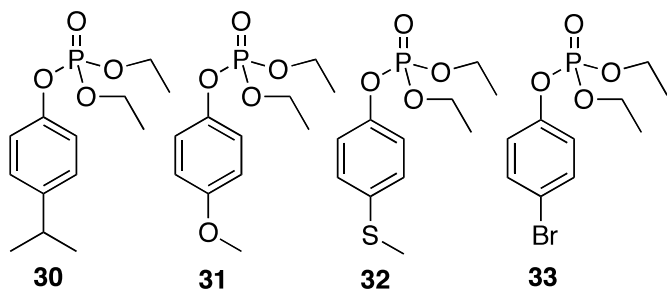

### Group V

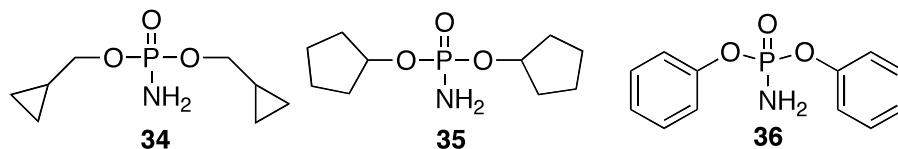

### 3. <sup>1</sup>H NMR, <sup>13</sup>C NMR, IR spectroscopic and Mass Spectrometric data of newly synthesized molecules.

| Molecule  | <sup>1</sup> H NMR                                                                                                                                                        | <sup>13</sup> C NMR                                               | IR                                  | MS                                                         |
|-----------|---------------------------------------------------------------------------------------------------------------------------------------------------------------------------|-------------------------------------------------------------------|-------------------------------------|------------------------------------------------------------|
| <b>1</b>  | 8.22 (2H, d, <i>J</i> 10 Hz),<br>7.36 (2H, d, <i>J</i> 10 Hz),<br>4.23 (4H, q, <i>J</i> 5 Hz), 1.35<br>(6H, t, <i>J</i> 5 Hz)                                             | 155.8, 144.8,<br>125.9, 120.7,<br>65.4, 16.3                      | 2988, 29840,<br>1590, 1345          | Calc. (M+Na) <sup>+</sup><br>298.0456<br><br>Expt 298.0449 |
| <b>6</b>  | 8.25 (2H, d, <i>J</i> 10 Hz),<br>7.38 (2H, d, <i>J</i> 10 Hz),<br>3.91 (6H, d, <i>J</i> 10 Hz)                                                                            | 155.3, 144.8,<br>125.7, 120.5,<br>55.3                            | 3017, 2914,<br>2860, 1252, 1045     | Calc (M+Na) <sup>+</sup><br>270.0143<br><br>Expt 270.0141  |
| <b>7</b>  | 8.25 (2H, d, <i>J</i> 10 Hz),<br>7.38 (2H, d, <i>J</i> 10 Hz),<br>4.28-4.25 (2H, m), 3.90<br>(6H, d, <i>J</i> 10 Hz), 1.40-<br>1.37 (3H, m),                              | 155.8, 145.1,<br>126.0, 120.9,<br>65.8, 55.5, 16.5                | 2928, 2846, 1048                    | Calc (M+Na) <sup>+</sup><br>284.0300<br><br>Expt 284.0301  |
| <b>8</b>  | 8.20 (2H, d, <i>J</i> 10 Hz),<br>7.35 (2H, d, <i>J</i> 10 Hz),<br>4.24-4.22 (2H, m), 4.11-<br>4.09 (2H, m), 1.72-1.68<br>(2H, m), 1.36-1.33 (3H,<br>m), 0.94-0.92 (3H, m) | 155.6, 144.6,<br>125.6, 120.5,<br>70.6, 65.2, 23.5,<br>16.1, 9.9  | 2987, 1591,<br>1342, 1290,<br>1023, | Calc (M+Na) <sup>+</sup><br>312.0613<br><br>Expt 312.0610  |
| <b>9</b>  | 8.18 (2H, d, <i>J</i> 10 Hz),<br>7.33 (2H, d, <i>J</i> 10 Hz),<br>4.76-4.74 (1H, m), 4.20-<br>4.17 (2H, m), 1.29-1.34<br>(9H, m),                                         | 155.7, 144.5,<br>125.5, 120.5,<br>74.6, 65.0, 50.4,<br>23.4, 16.0 | 2980, 1580,<br>1349, 1256, 1025     | Calc (M+Na) <sup>+</sup><br>312.0613<br><br>Expt 312.0611  |
| <b>10</b> | 8.22 (2H, d, <i>J</i> 10 Hz),                                                                                                                                             | 155.9, 144.8,                                                     | 2960, 1590,                         | Calc (M+H) <sup>+</sup>                                    |

|           |                                                                                                                                                                                                                               |                                                                                  |                                 |                                                        |
|-----------|-------------------------------------------------------------------------------------------------------------------------------------------------------------------------------------------------------------------------------|----------------------------------------------------------------------------------|---------------------------------|--------------------------------------------------------|
|           | 7.37 (2H, d, <i>J</i> 10Hz),<br>4.13 (4H, q, <i>J</i> 5Hz), 1.74-<br>1.71 (4H, m), 0.95 (6H, q,<br><i>J</i> 5Hz)                                                                                                              | 125.8, 120.7,<br>70.7, 23.8, 10.1                                                | 1339, 1236, 1015                | 304.0950<br>Expt 304.0965                              |
| <b>11</b> | 8.20 (2H, d, <i>J</i> 10 Hz),<br>7.34 (2H, d, <i>J</i> 10 Hz),<br>4.74 (2H, q, <i>J</i> 5Hz), 1.32<br>(12H, d, <i>J</i> 5 Hz)                                                                                                 | 156.4, 144.6,<br>125.7, 120.6,<br>74.4, 14.3                                     | 2984, 2938,<br>1592, 1347, 1008 | Calc. (M+Na) <sup>+</sup><br>326.0769<br>Expt 326.0739 |
| <b>12</b> | 8.23 (2H, d, <i>J</i> 10Hz),<br>7.38 (2H, d, <i>J</i> 10Hz),<br>4.04 (4H, q, <i>J</i> 10Hz),<br>1.19-1.21 (2H, m), 0.60<br>(4H, d, <i>J</i> 10Hz), 0.32<br>(4H, d, <i>J</i> 10Hz)                                             | 151.2, 130.0,<br>125.2, 120.4,<br>73.7, 11.5, 3.8                                | 3114, 2894,<br>1522, 1347, 1036 | Calc (M+Na) <sup>+</sup><br>350.0769<br>Expt 350.0786  |
| <b>13</b> | 8.25 (2H, d, <i>J</i> 10Hz),<br>7.38 (2H, d, <i>J</i> 10Hz),<br>4.18 (4H, q, <i>J</i> 5Hz), 1.72-<br>1.68 (4H, m), 1.44-1.41<br>(4H, m), 0.94 (6H, t, <i>J</i><br>5Hz)                                                        | 155.8, 144.8,<br>125.8, 120.7,<br>69.0, 32.3, 18.8,<br>13.7                      | 2956, 1591,<br>1523, 1346, 1233 | Calc (M+Na) <sup>+</sup><br>354.1082<br>Expt 354.1078  |
| <b>14</b> | 8.23 (2H, d, <i>J</i> 10Hz),<br>7.35 (2H, d, <i>J</i> 10Hz),<br>4.25-4.24 (2H, m), 4.18-<br>4.15 (2H, m), 1.71-1.70<br>(2H, m), 1.39-1.35 (7H,<br>m), 0.89-0.88 (3H, m)                                                       | 155.8, 144.8,<br>125.8, 120.6,<br>69.3, 65.3, 29.5,<br>27.6, 22.2, 16.2,<br>14.0 | 2950, 1601,<br>1388, 1295, 1101 | Calc (M+Na) <sup>+</sup><br>340.0926<br>Expt 340.0923  |
| <b>15</b> | 8.25 (2H, d, <i>J</i> 10Hz),<br>7.39 (2H, d, <i>J</i> 10Hz),<br>4.54-4.52 (1H, m), 4.26-<br>4.24 (2H, m), 1.96-1.93<br>(2H, m), 1.77-1.74 (2H,<br>m), 1.39-1.30 (3H, m),<br>1.28 (3H, t, <i>J</i> 5Hz), 1.27-<br>1.26 (3H, m) | 155.8, 144.5,<br>125.6, 120.6,<br>79.2, 65.0, 33.2,<br>24.9, 23.4, 16.0          | 2921, 2866,<br>1259, 1045       | Calc (M+Na) <sup>+</sup><br>352.1395<br>Expt 352.1390  |
| <b>16</b> | 8.20 (2H, d, <i>J</i> 10Hz),<br>7.34 (2H, d, <i>J</i> 10Hz),<br>4.19-4.17 (2H, m), 3.61-<br>3.60 (4H, m), 3.21-3.19<br>(4H, m), 1.35 (3H, t, <i>J</i><br>5Hz),                                                                | 156.0, 144.4,<br>125.6, 120.6,<br>66.8, 63.7, 44.6,<br>16.1                      | 3010, 2921,<br>2860, 1255, 1048 | Calc (M+Na) <sup>+</sup><br>339.0722<br>Expt 339.0722  |
| <b>A</b>  | 8.18 (2H, d, <i>J</i> 10Hz),<br>7.34 (2H, d, <i>J</i> 10Hz),<br>4.12 (4H, q, <i>J</i> 5Hz), 1.65<br>(4H, t, <i>J</i> 5Hz), 1.31 -1.24<br>(12H, m), 0.82 (6H, t,<br>5Hz)                                                       | 155.6, 144.6,<br>125.5, 120.5,<br>69.1, 31.1, 30.1,<br>24.9, 22.4, 13.8          | 2928, 1593,<br>1346, 1023, 936  | Calc (M+Na) <sup>+</sup><br>410.1708<br>Expt 410.1724  |
| <b>B</b>  | 8.15 (2H, d, <i>J</i> 10Hz),<br>7.31 (2H, d, <i>J</i> 10Hz),<br>4.10-4.09 (4H, m), 4.02-                                                                                                                                      | 155.6, 144.5,<br>125.5, 120.5,<br>69.0, 60.2, 31.6,                              | 2957, 1593,<br>1346, 1295,      | Calc (M+Na) <sup>+</sup><br>466.2334                   |

|          |                                                                                                                                                                            |                                                                                  |                               |                                                           |
|----------|----------------------------------------------------------------------------------------------------------------------------------------------------------------------------|----------------------------------------------------------------------------------|-------------------------------|-----------------------------------------------------------|
|          | 4.01(4H,m), 1.63-1.61(4H, m), 1.27-1.14 (16H, m), 0.8-0.6 (6H, m)                                                                                                          | 30.2, 29.1, 25.3, 22.5, 13.9                                                     | 1023,                         | Expt 466.2292                                             |
| <b>C</b> | 8.24 (2H, d, <i>J</i> 10Hz), 7.38 (2H, d, <i>J</i> 10Hz), 4.26-4.24 (2H, m), 4.18-4.17(2H, m), 1.71-1.70 (2H, m), 1.40-1.37 (3H, m), 1.28-1.25 (10H, m), 0.89-0.86 (3H, m) | 155.8, 144.8, 125.8, 120.7, 69.4, 65.4, 31.9, 30.4, 29.3, 25.5, 22.8, 16.3, 14.2 | 2955, 1590, 1346, 1295, 1028, | Calc (M+Na) <sup>+</sup><br>382.1395<br><br>Expt 382.1390 |

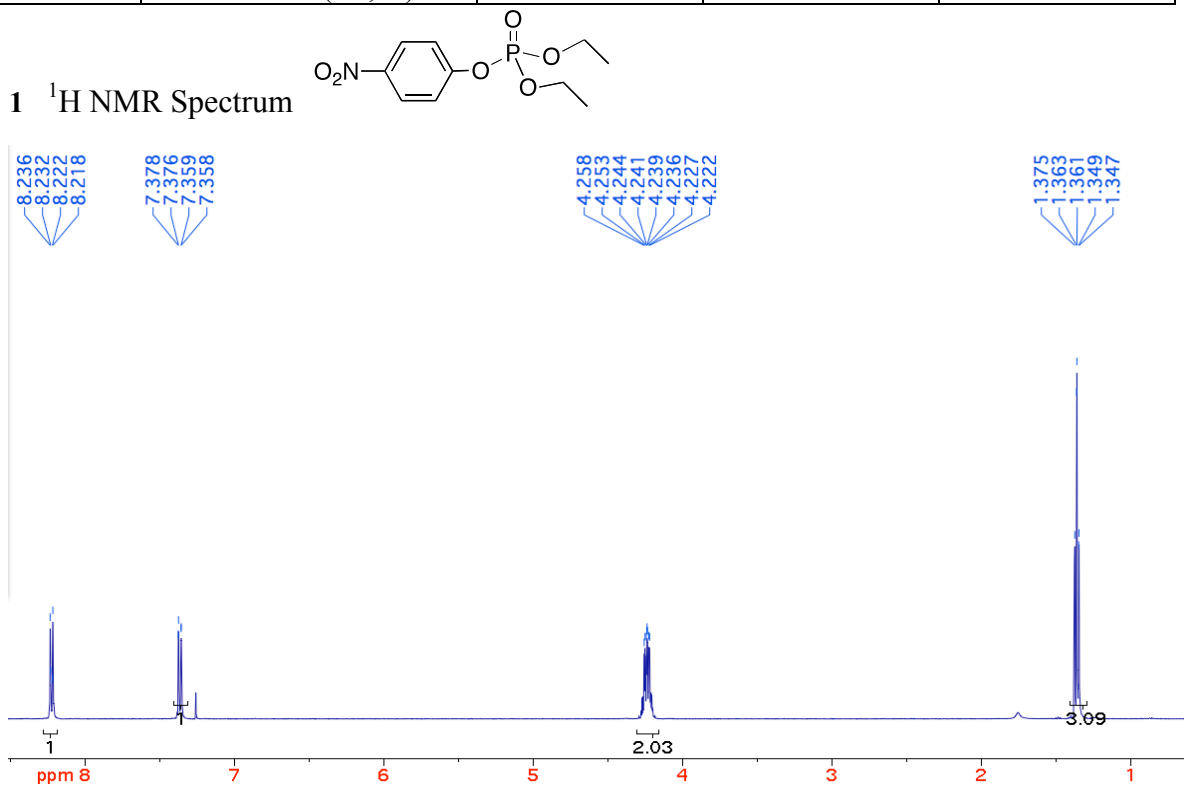

<sup>13</sup>C NMR Spectrum

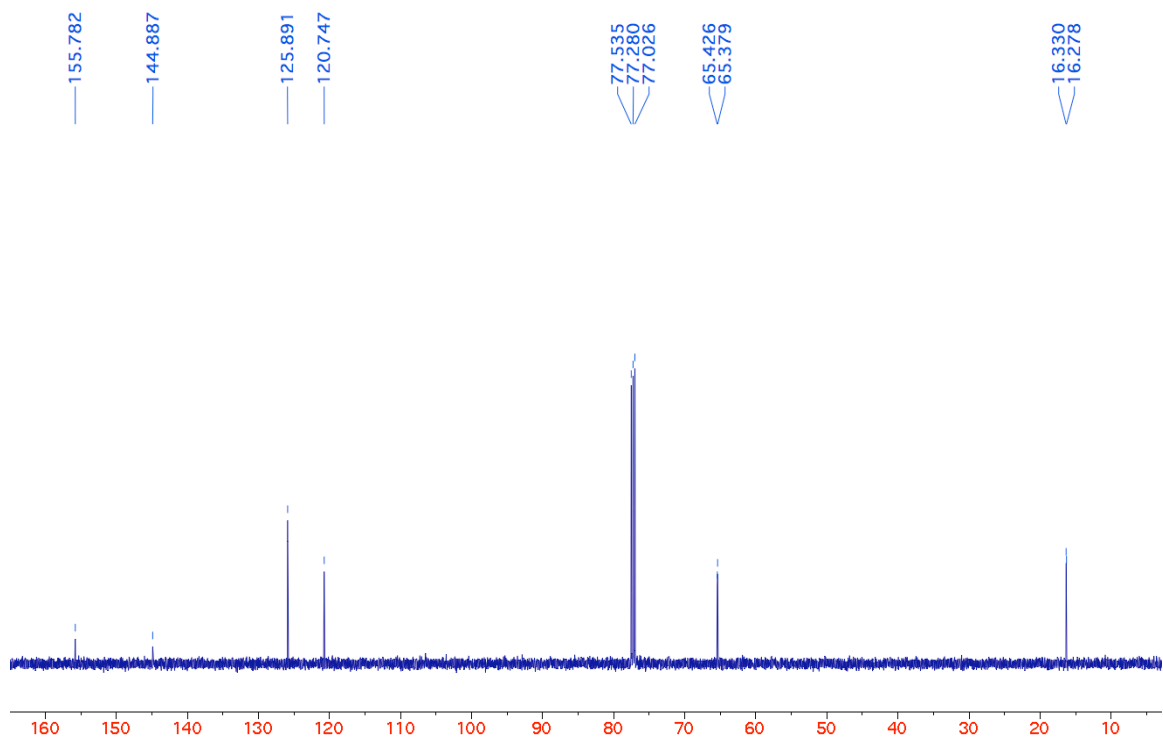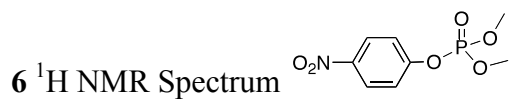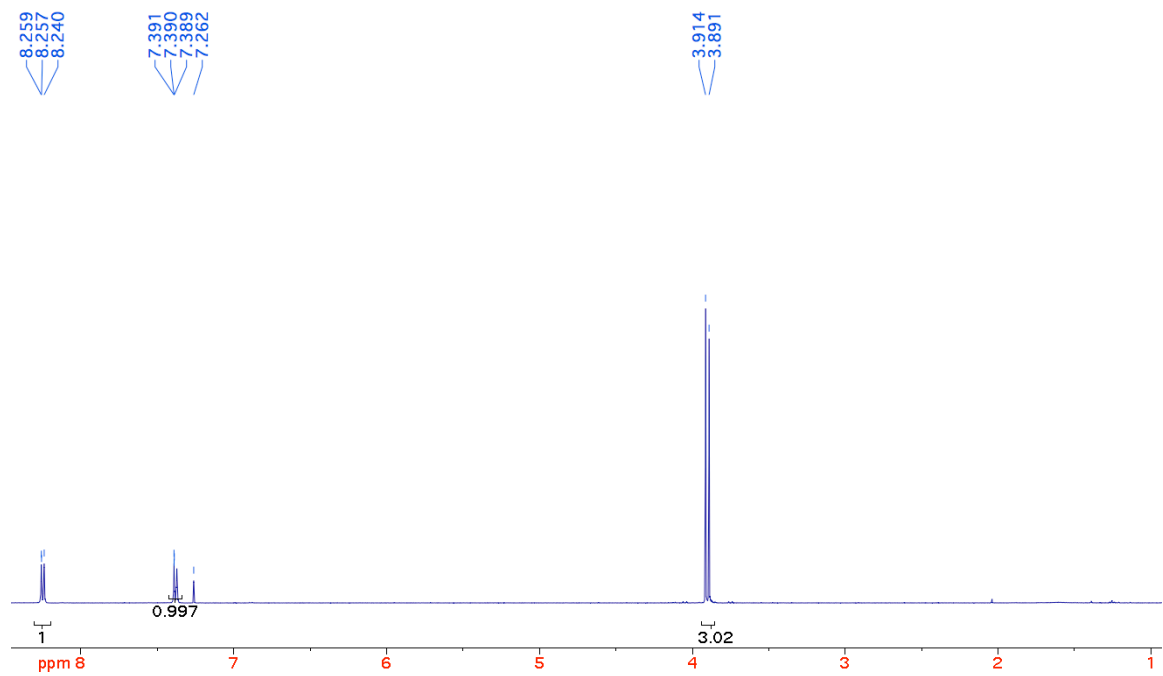

$^{13}\text{C}$  NMR Spectrum

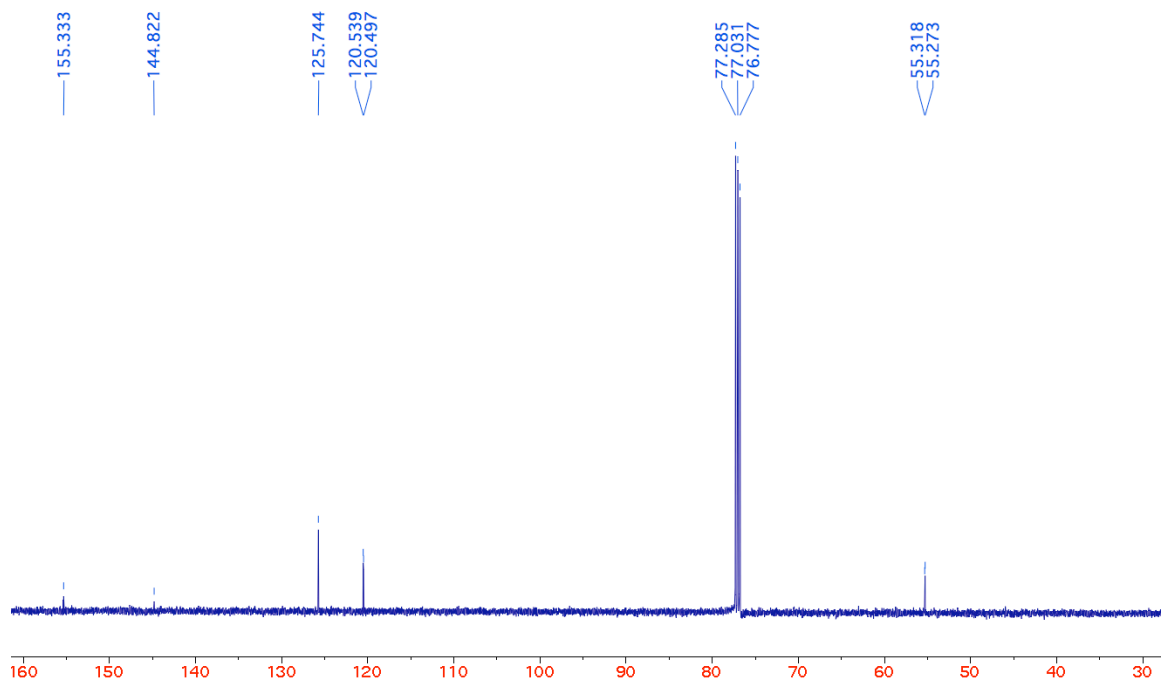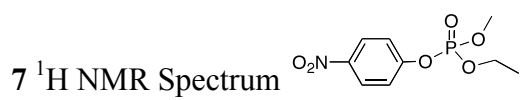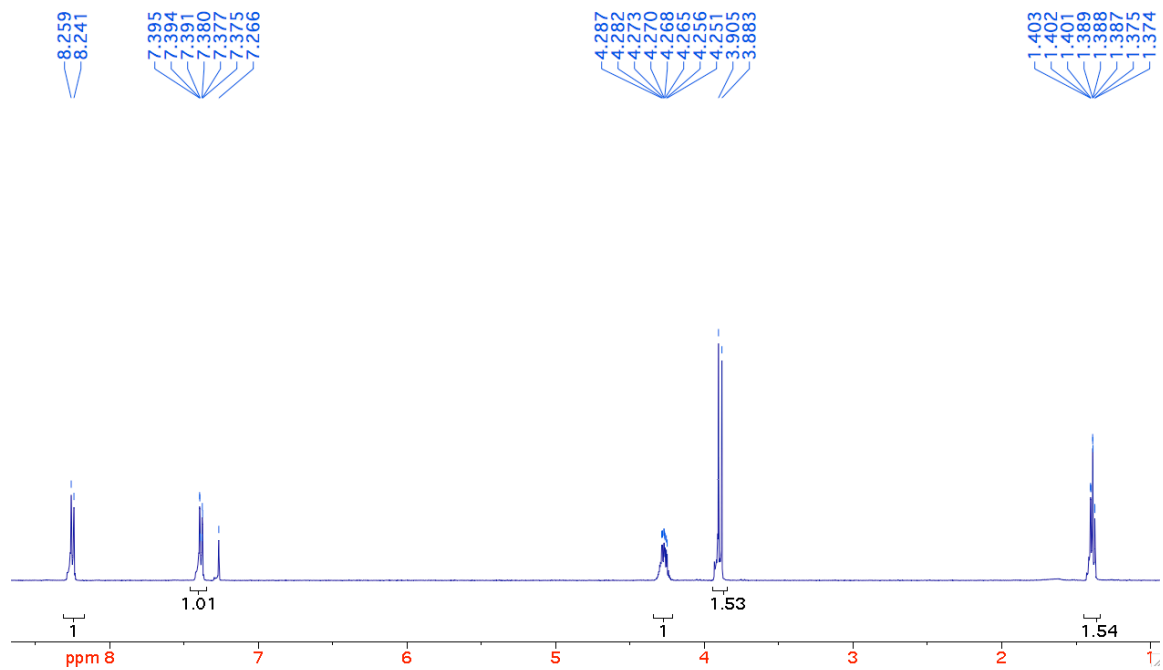

$^{13}\text{C}$  NMR Spectrum



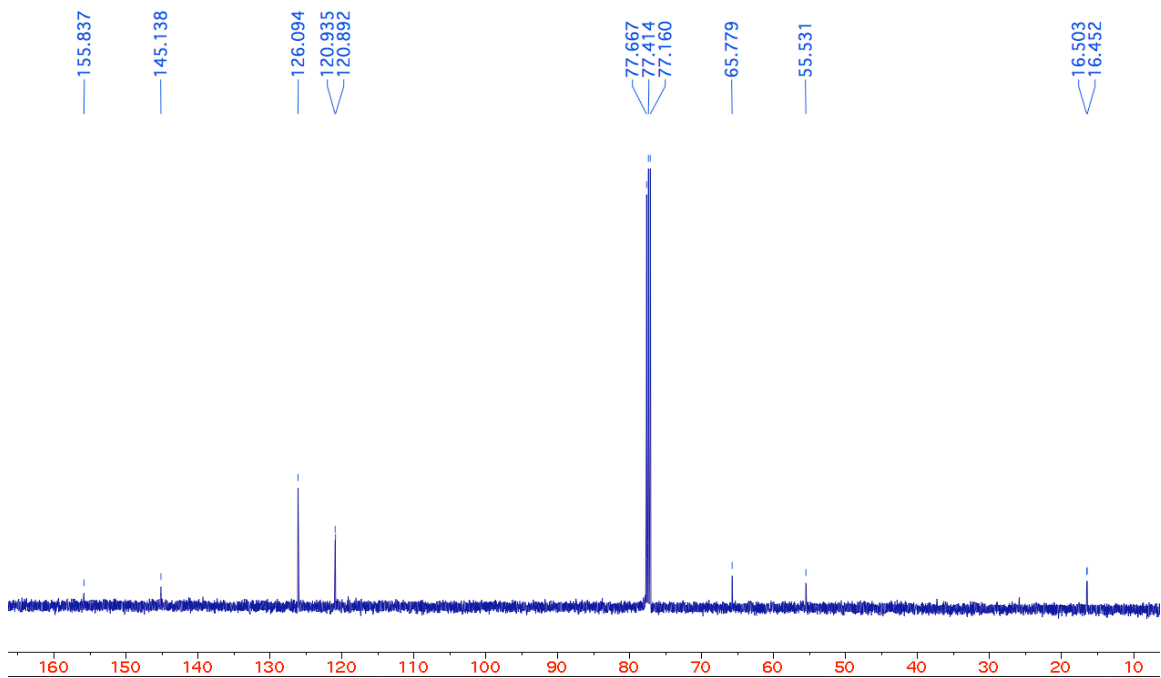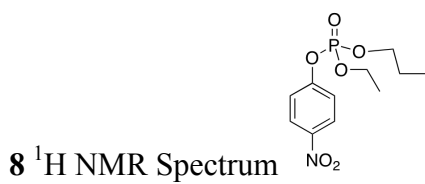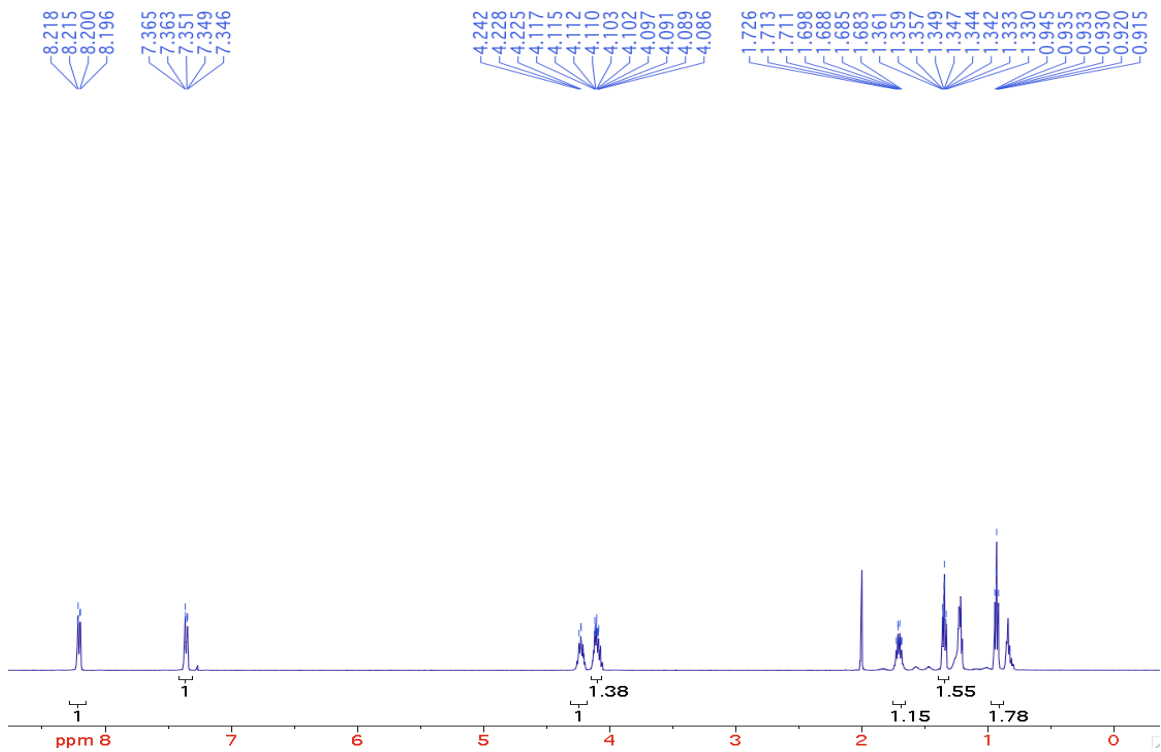

$^{13}\text{C}$  NMR Spectrum

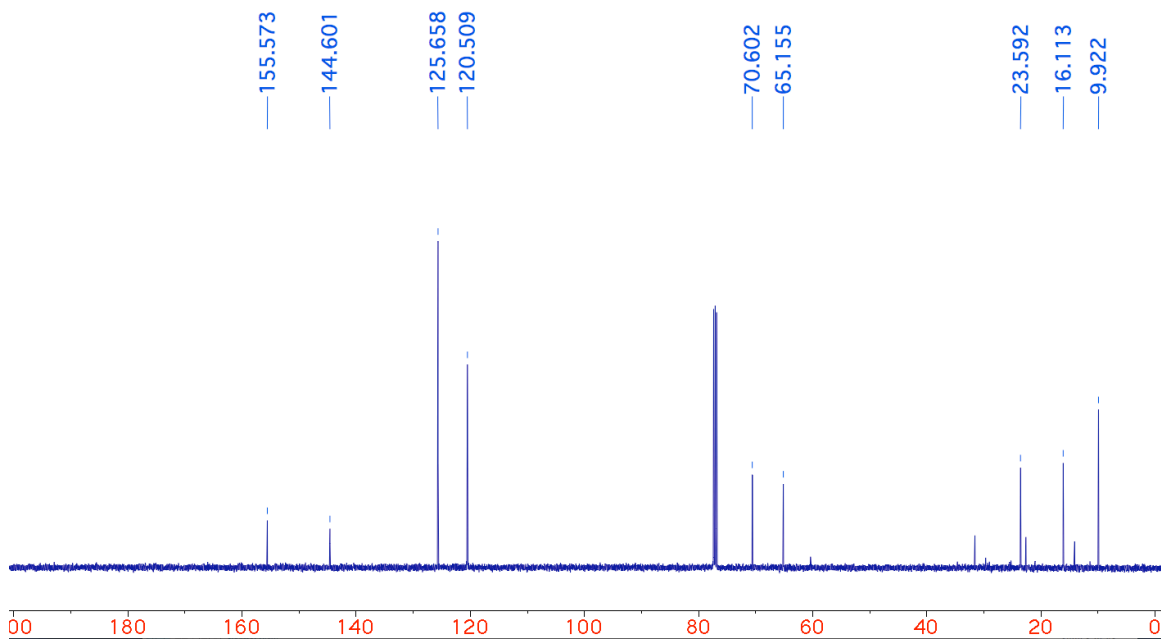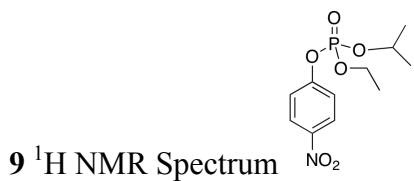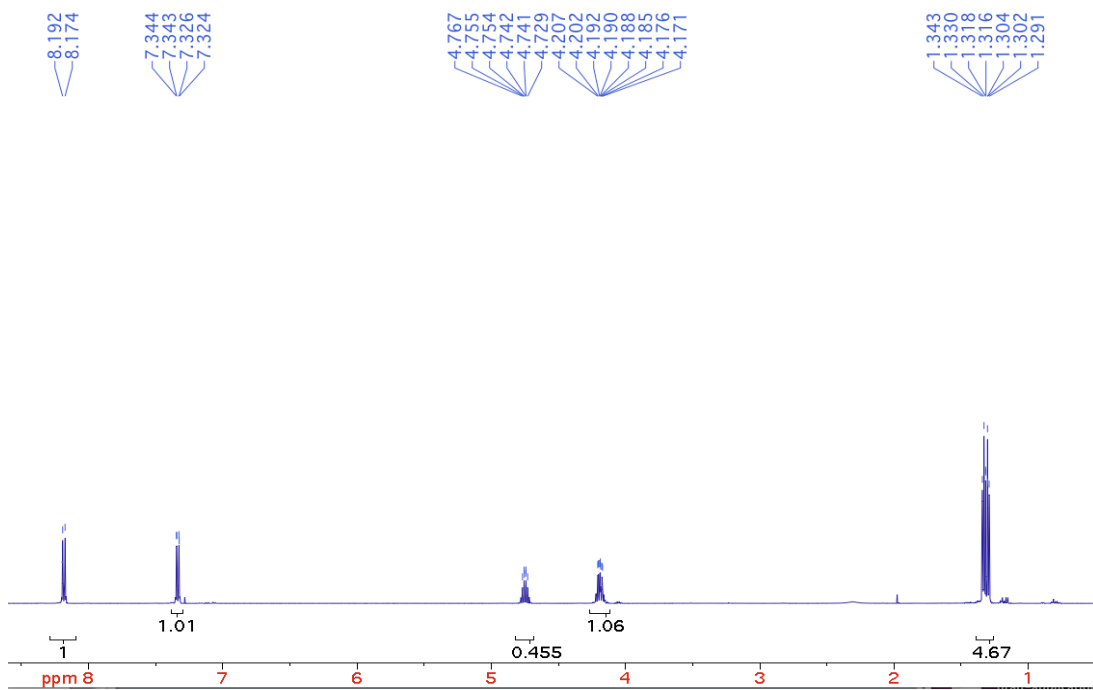

<sup>13</sup>C NMR Spectrum

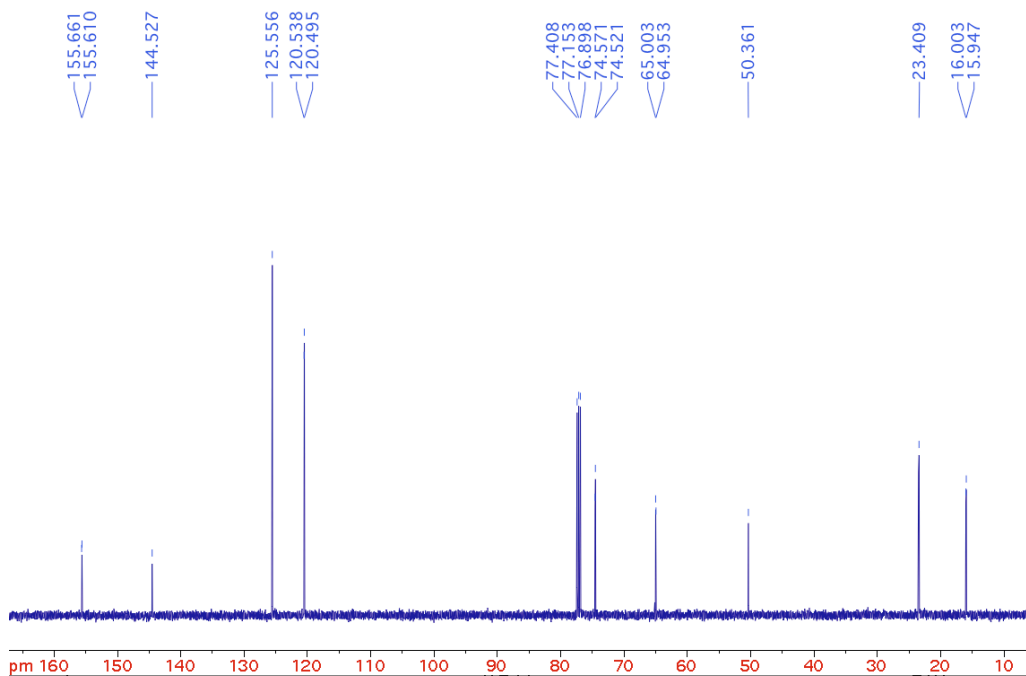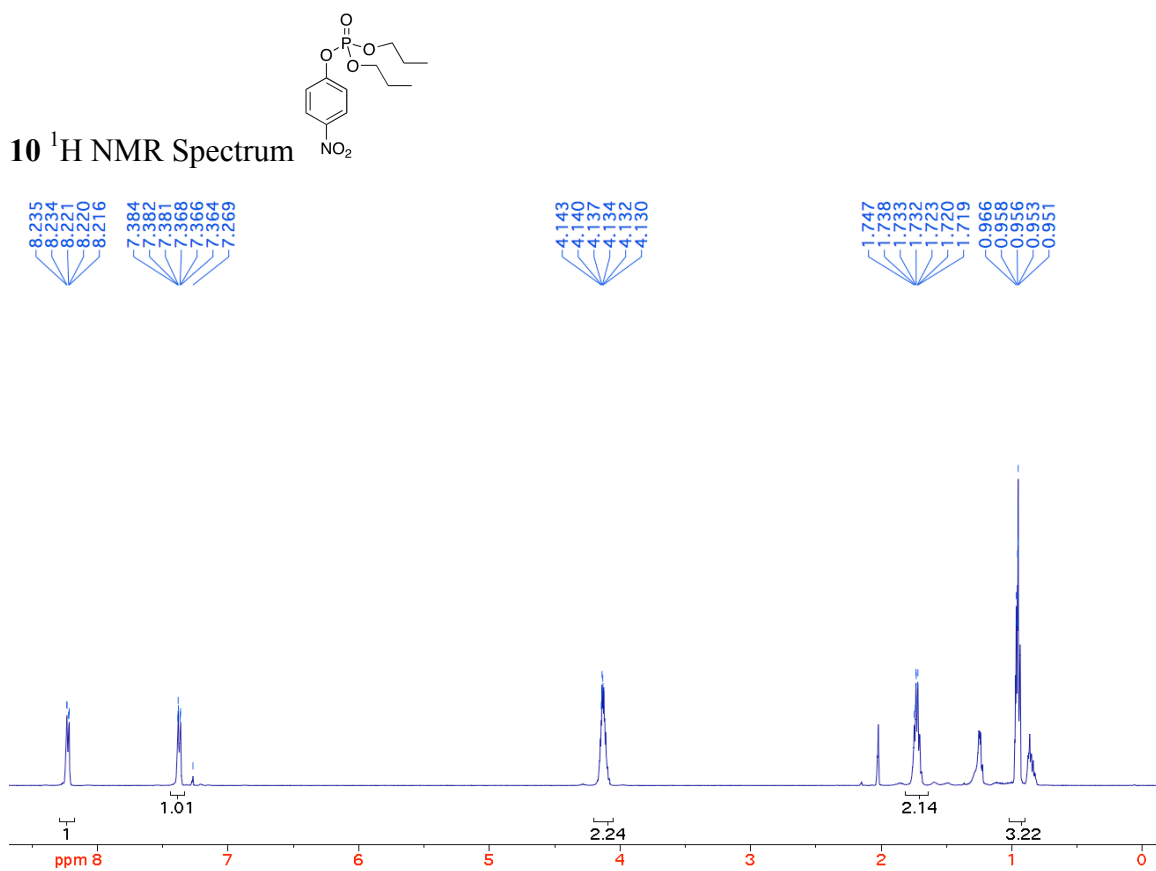

$^{13}\text{C}$  NMR Spectrum

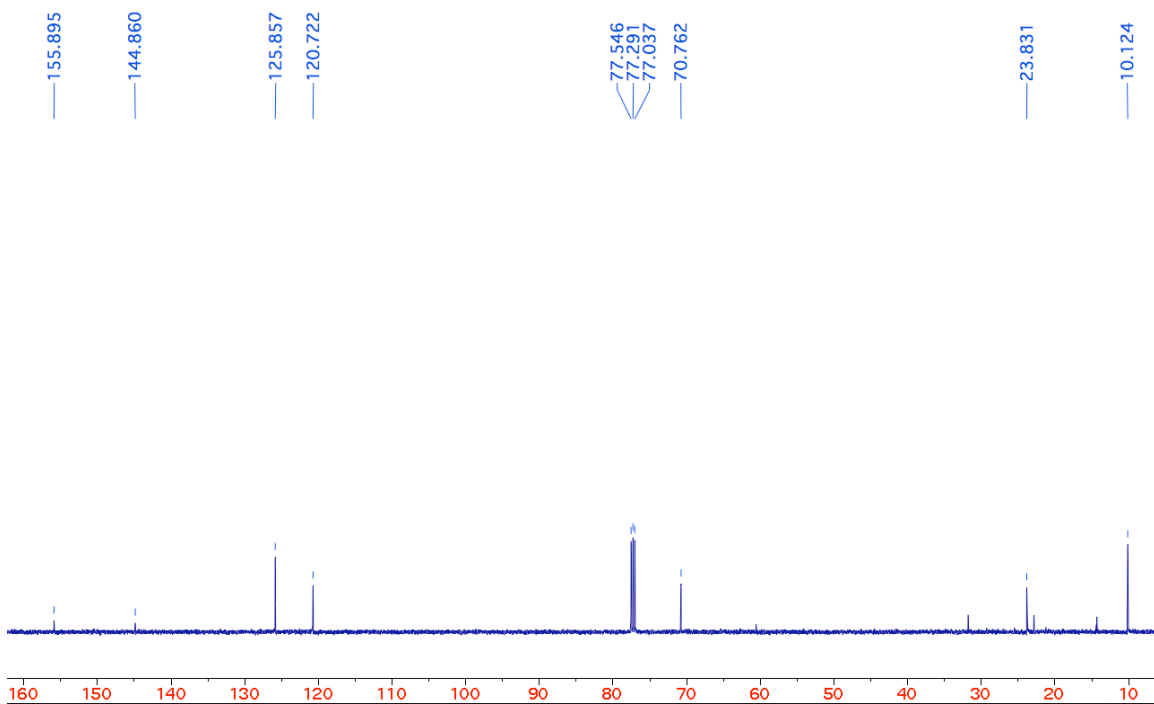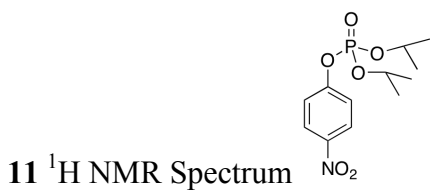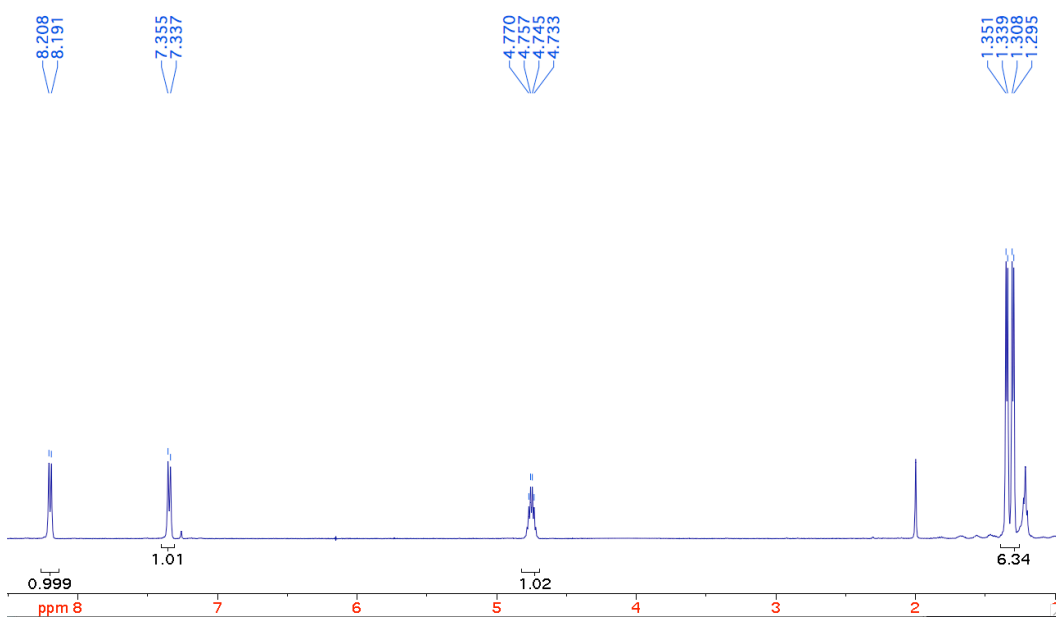

<sup>13</sup>C NMR Spectrum

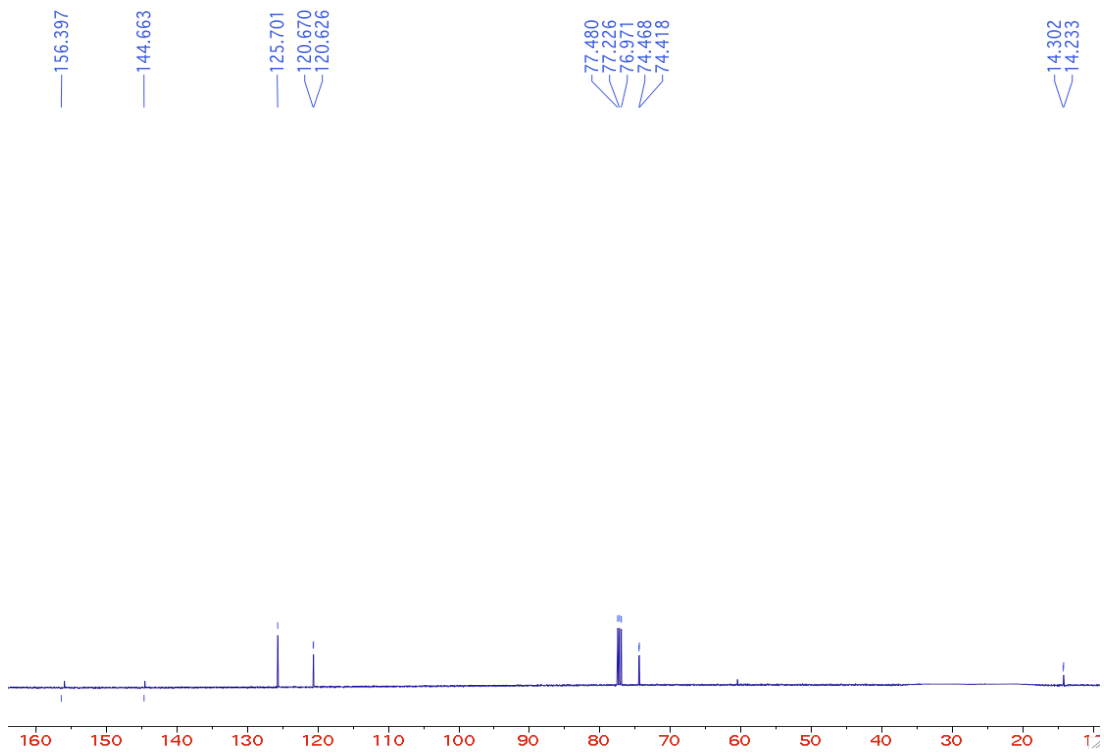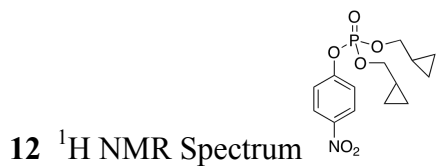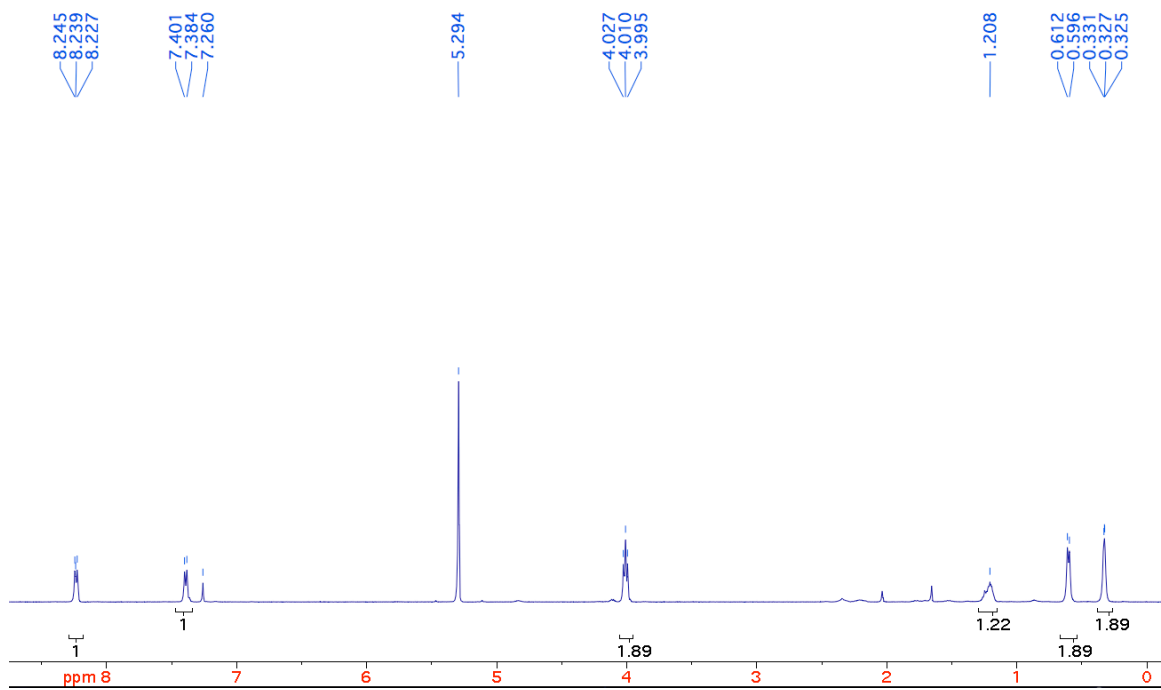

<sup>13</sup>C NMR Spectrum

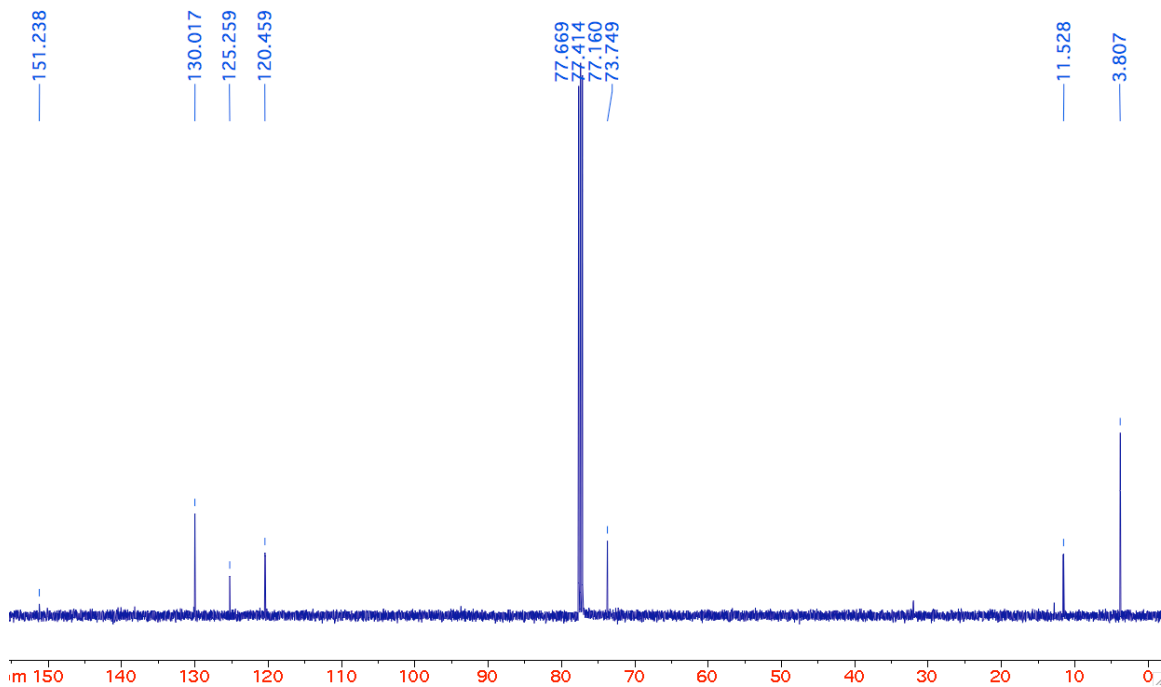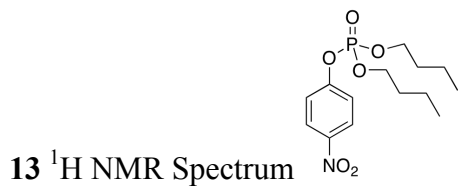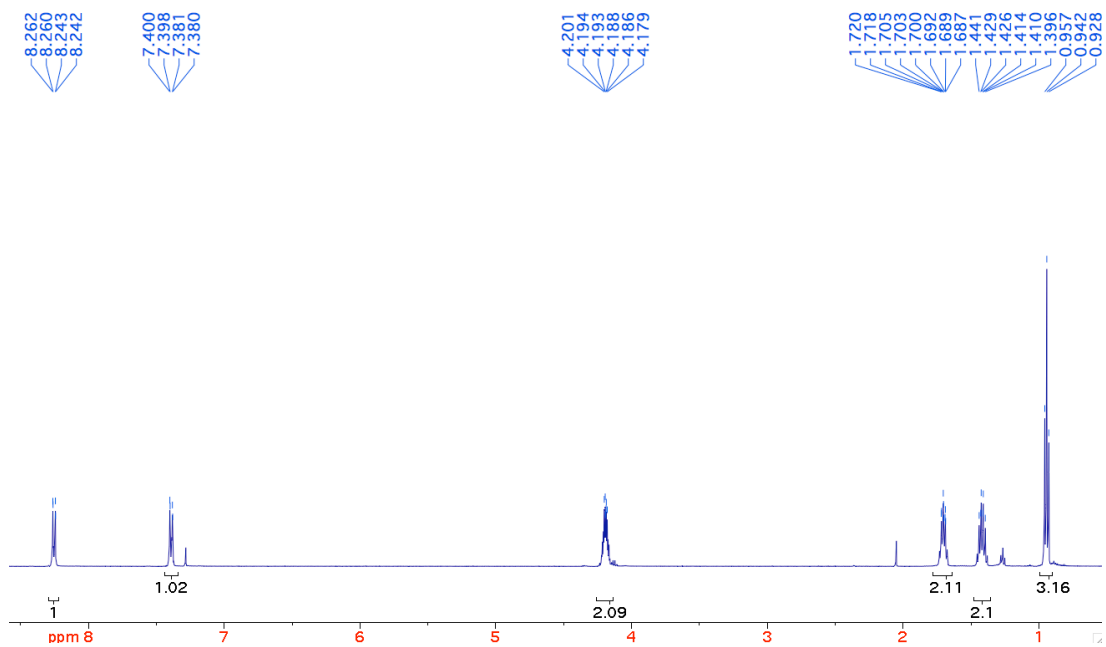

<sup>13</sup>C NMR Spectrum

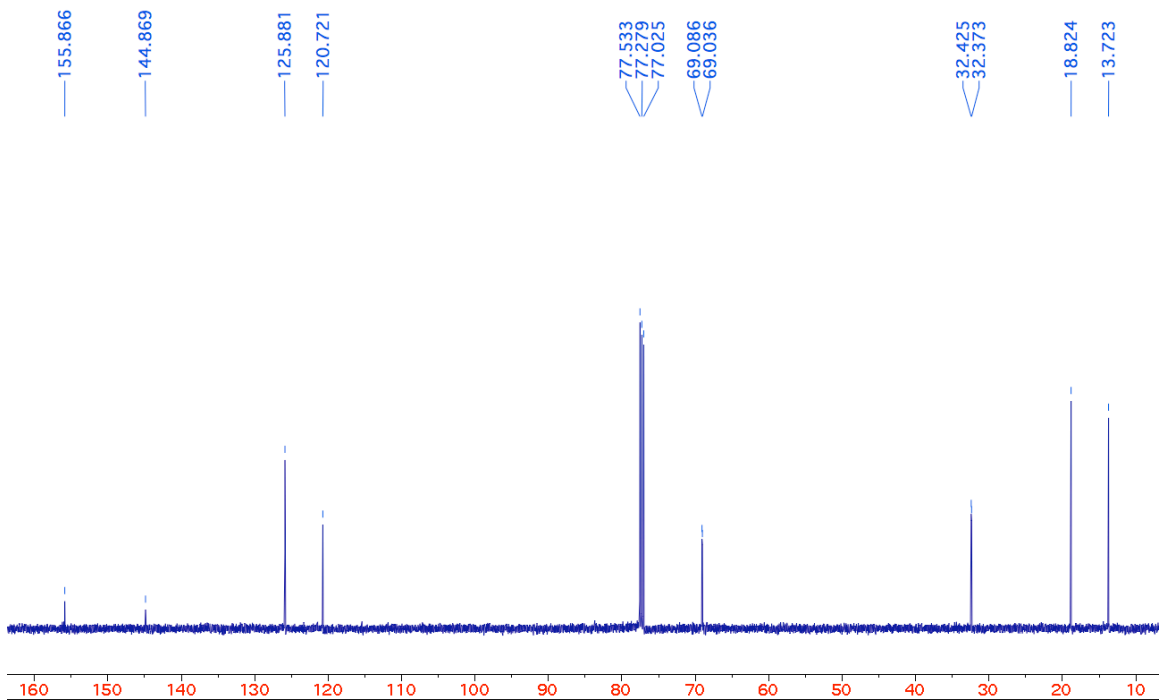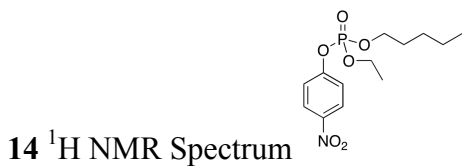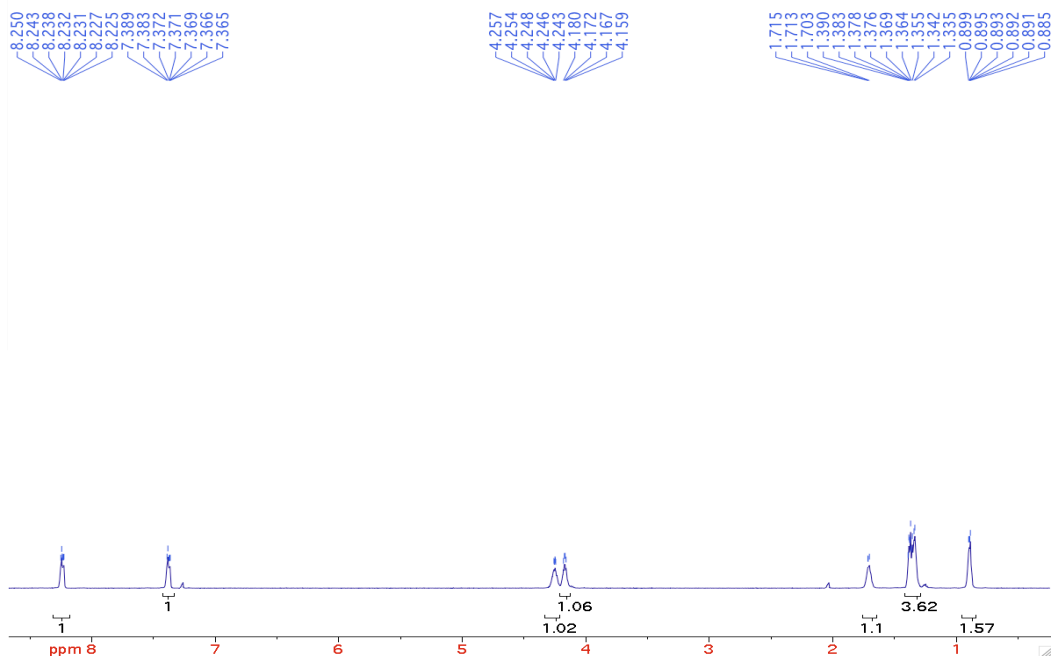

<sup>13</sup>C NMR Spectrum

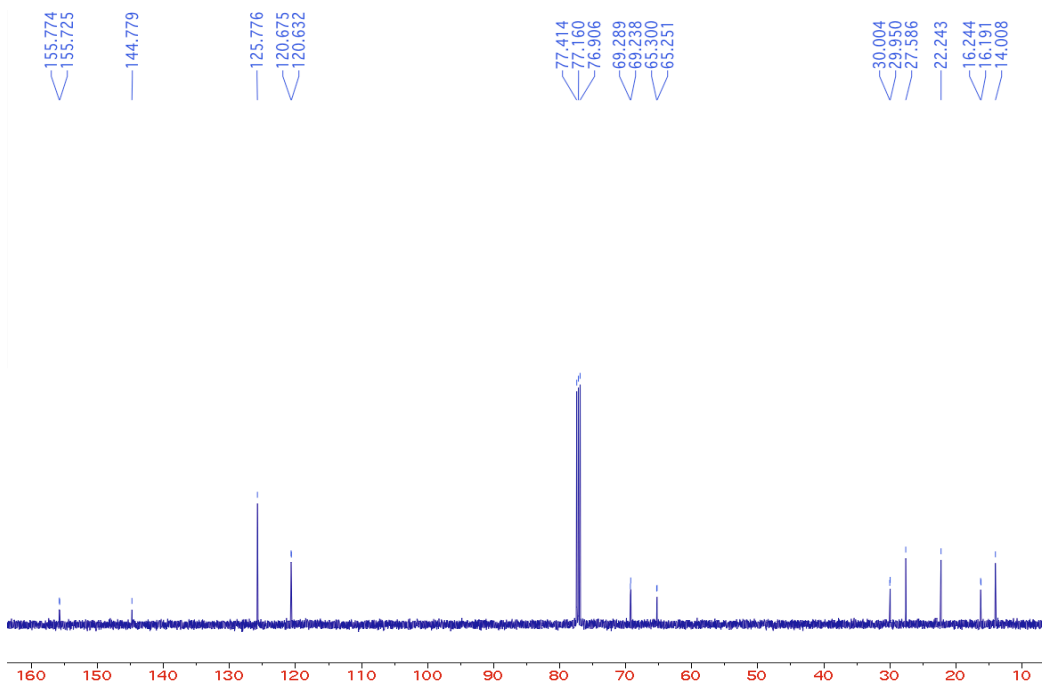

**15 <sup>1</sup>H NMR Spectrum**

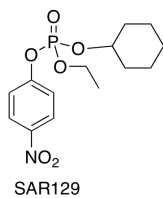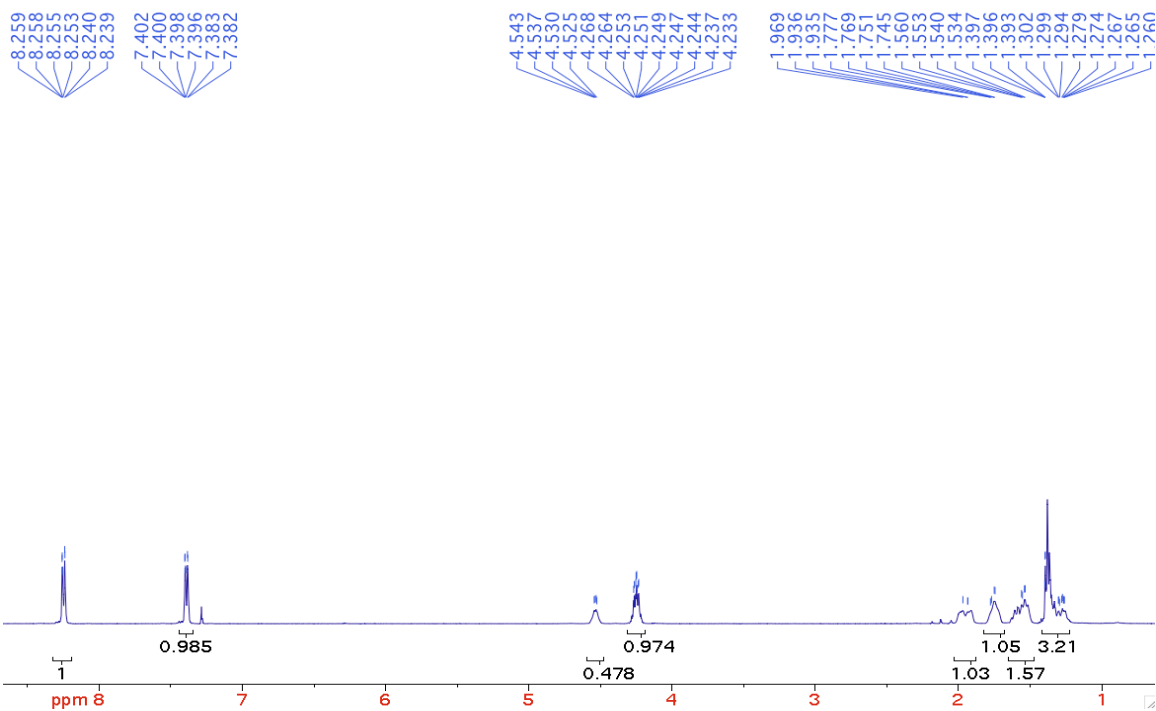

**<sup>13</sup>C NMR Spectrum**



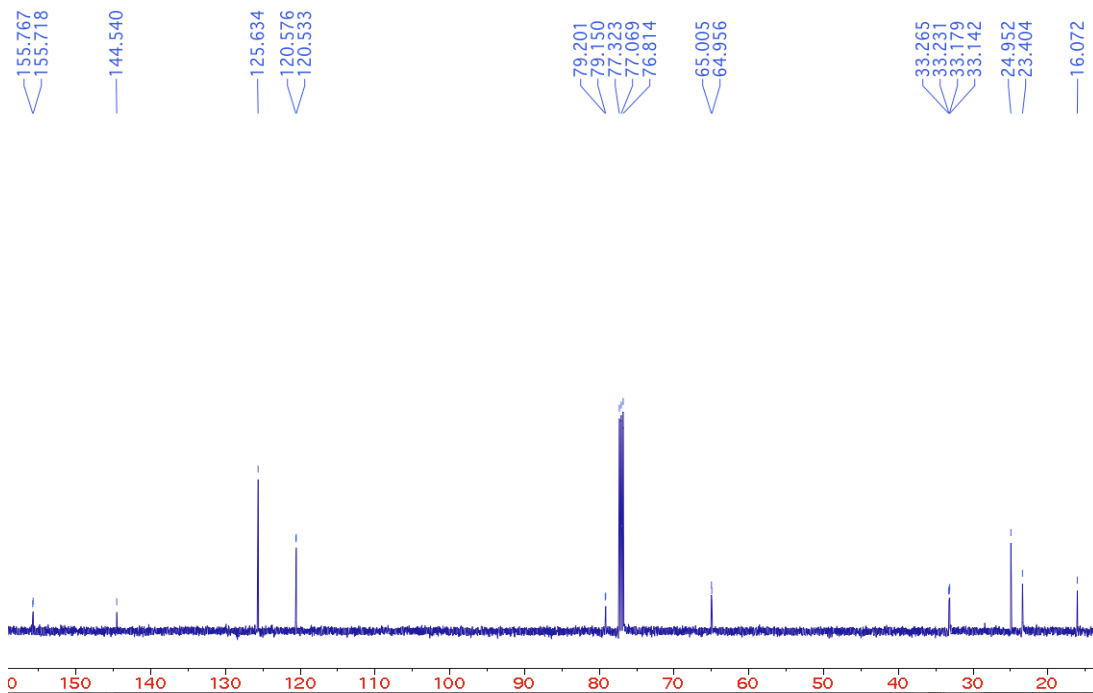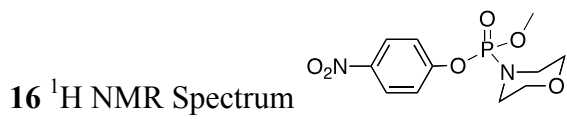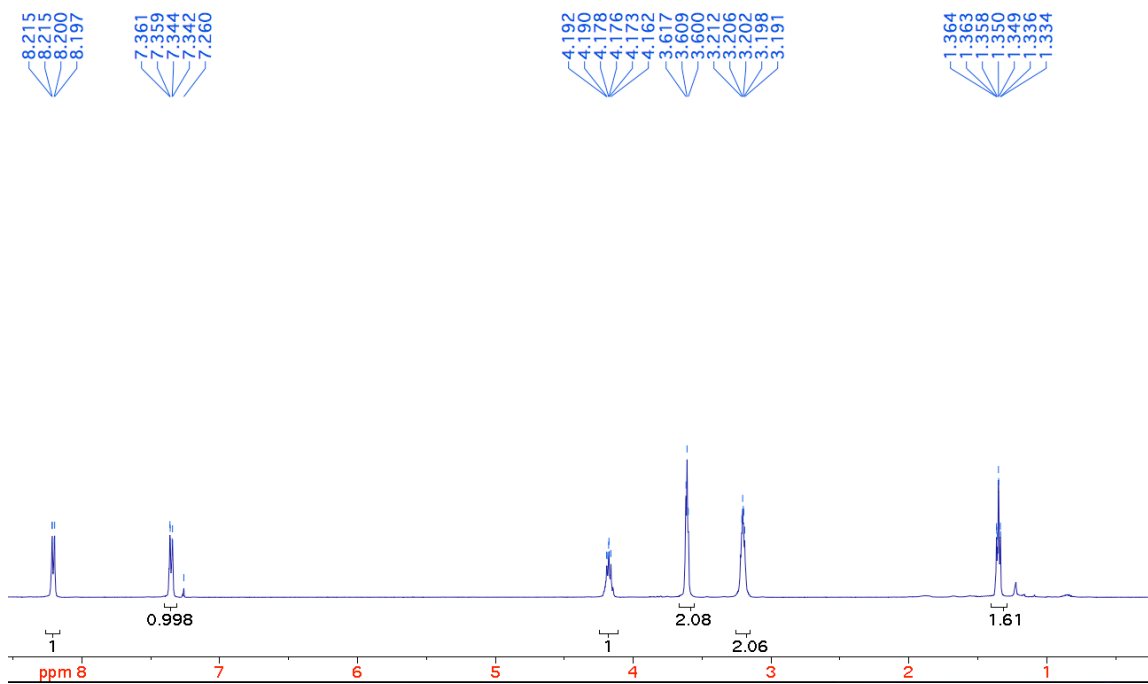

<sup>13</sup>C NMR Spectrum

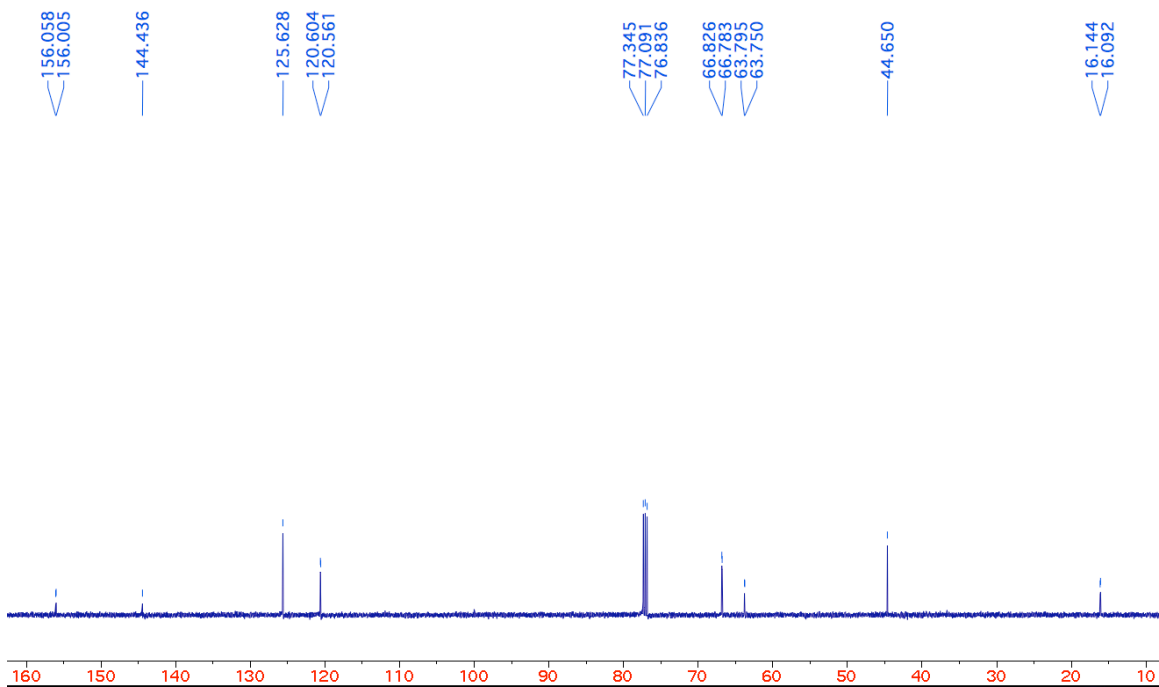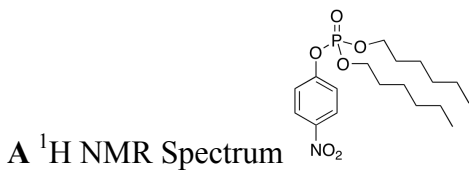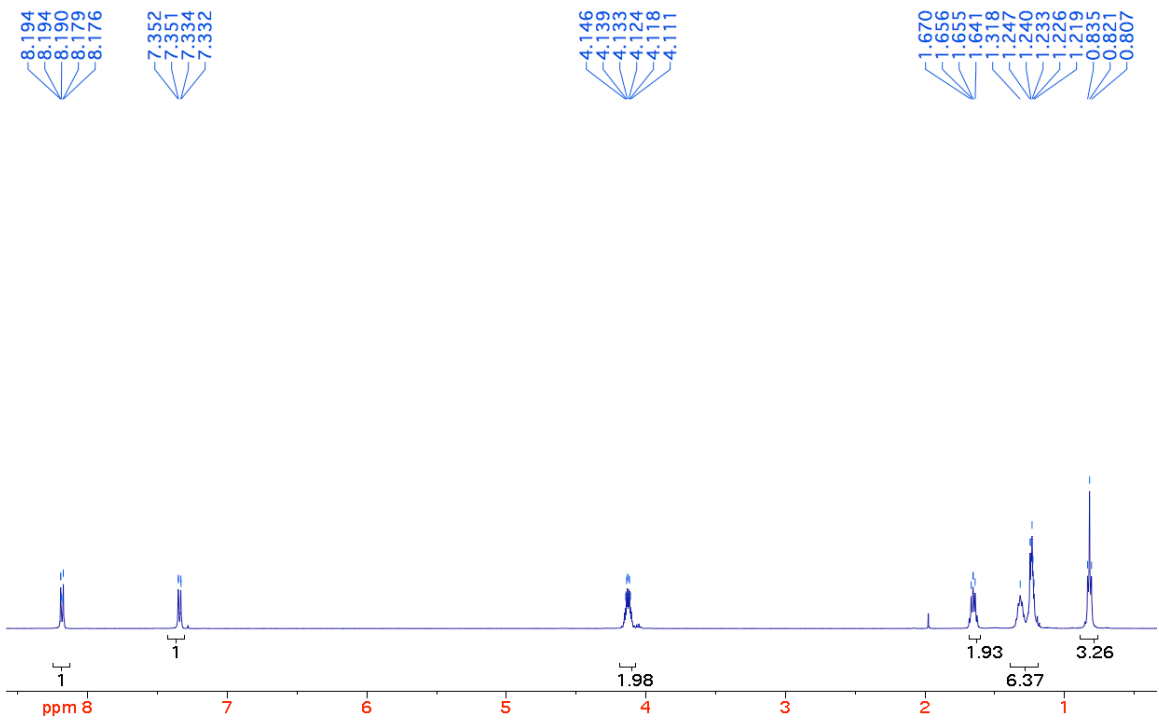

$^{13}\text{C}$  NMR Spectrum

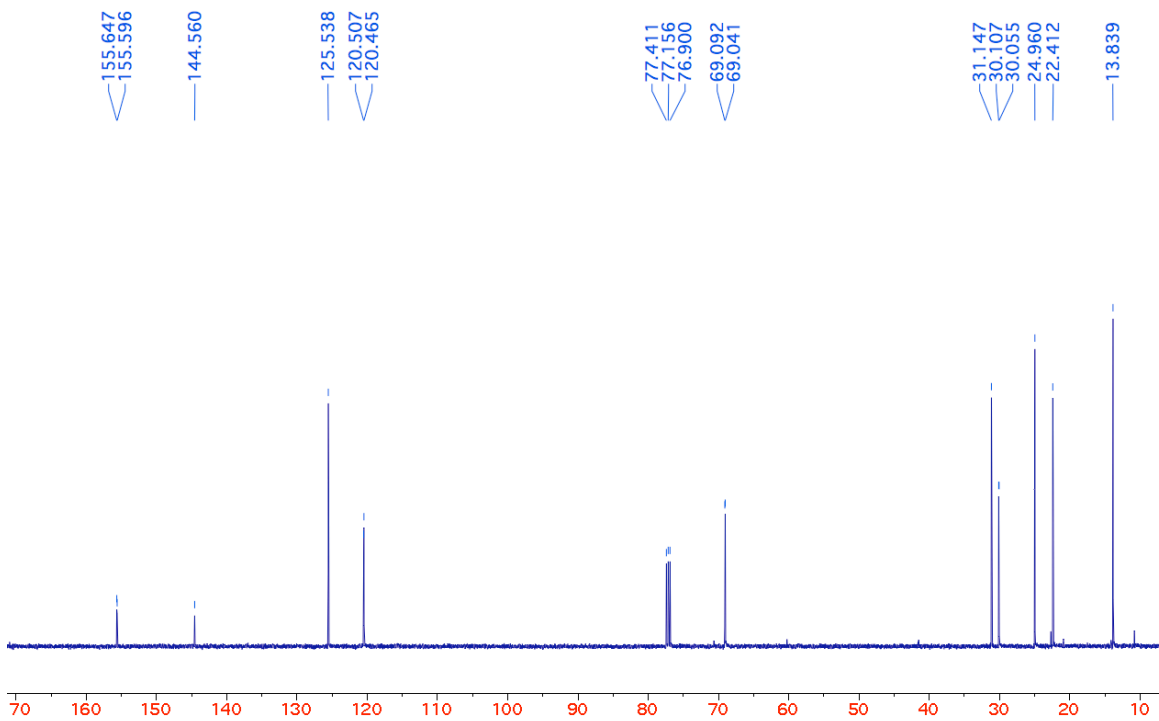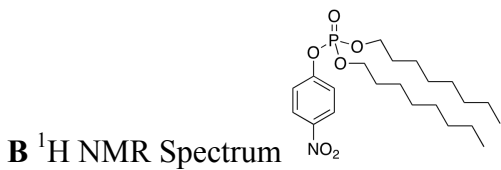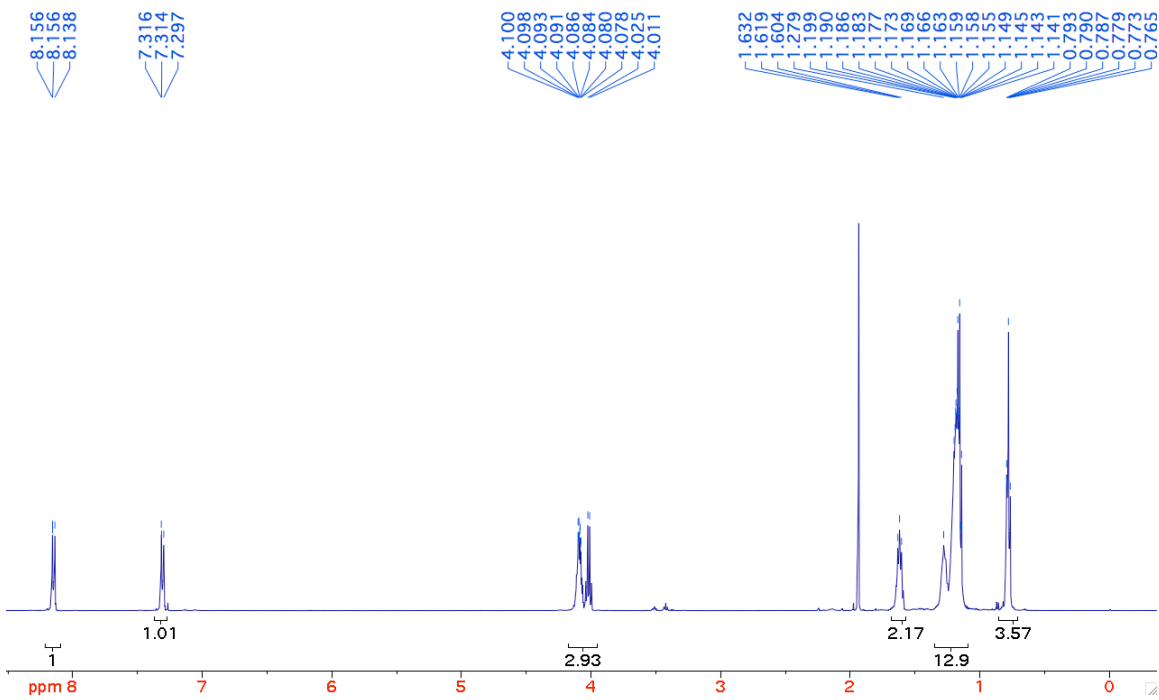

$^{13}\text{C}$  NMR Spectrum

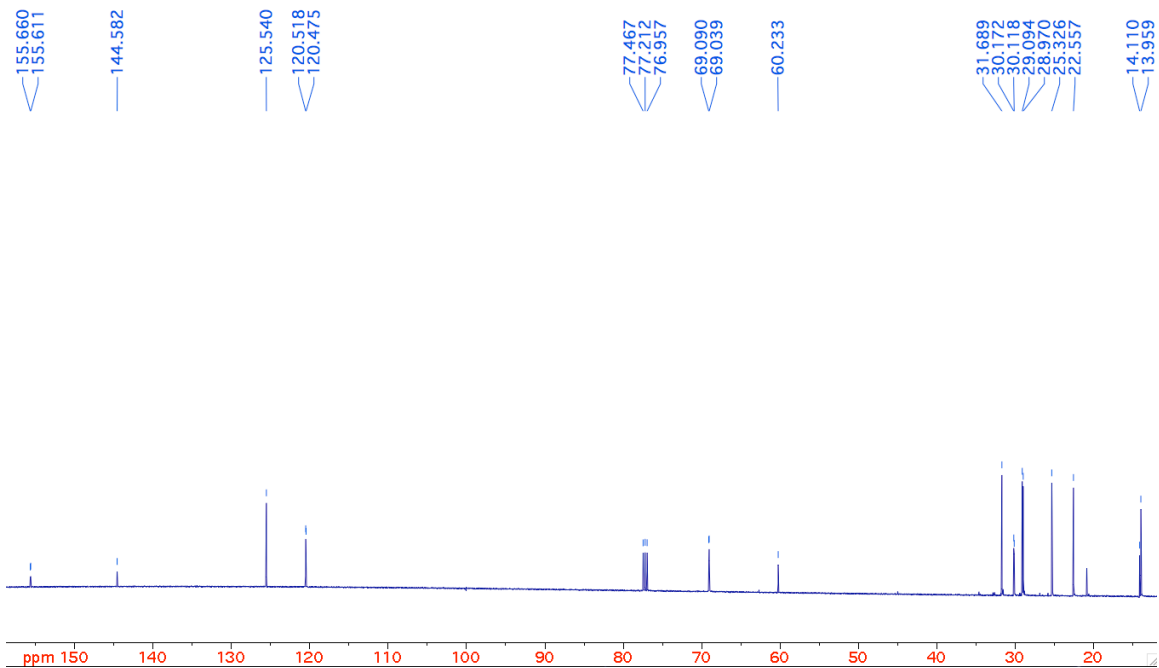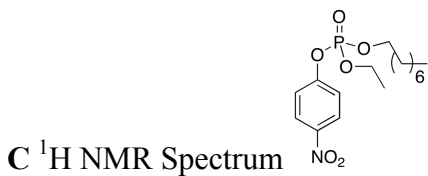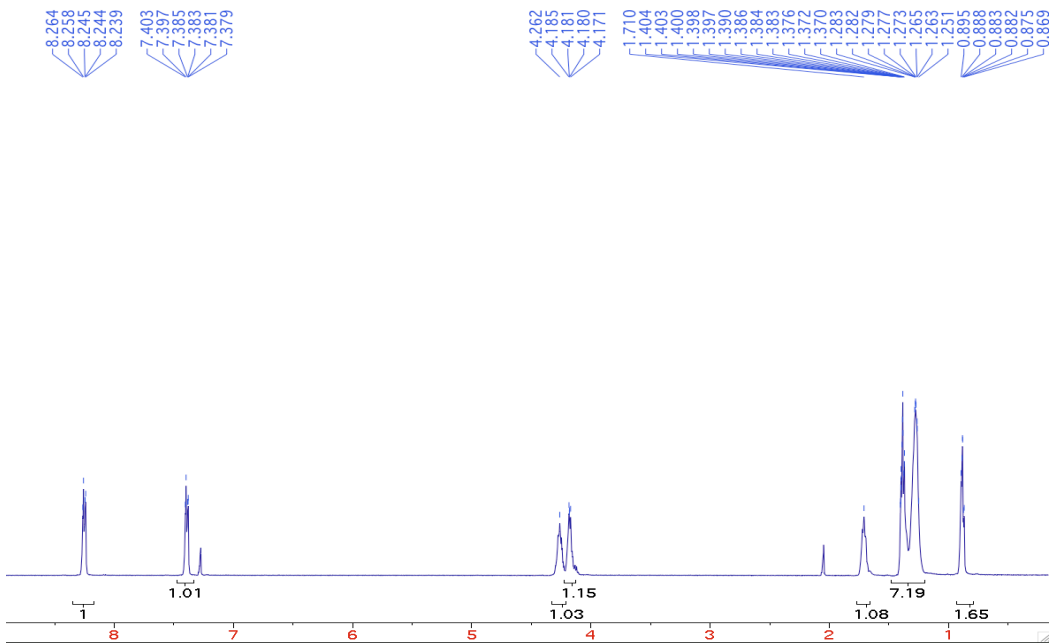

$^{13}\text{C}$  NMR Spectrum

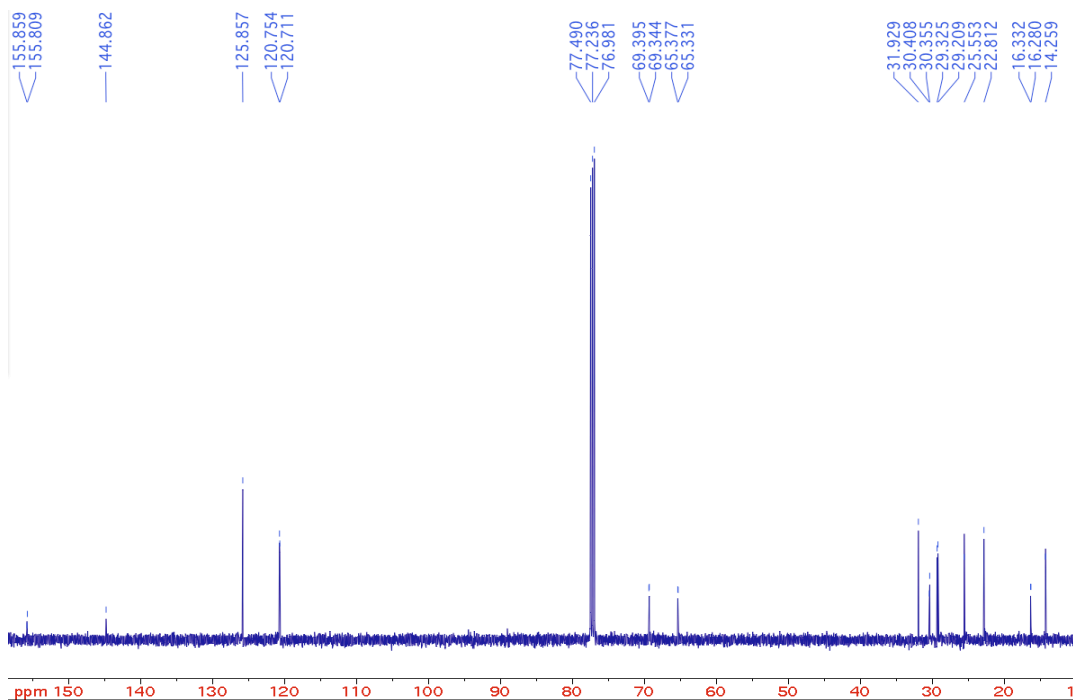

## Group II

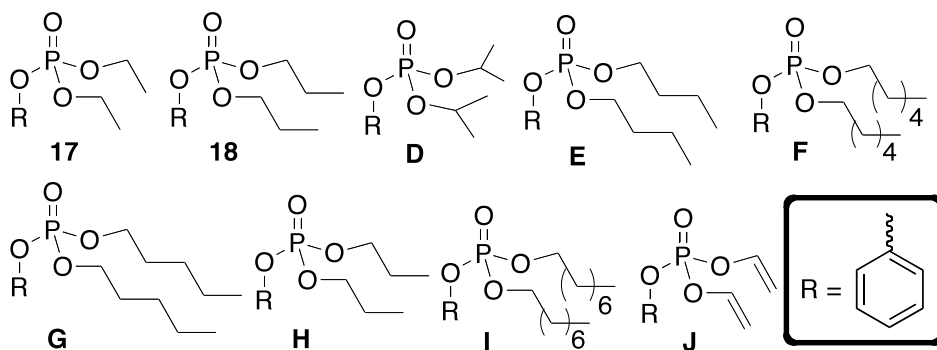

Molecules **17**, **18**, **D-H** are known and they were synthesized and characterized following reported procedure.<sup>1</sup>

| Molecule | <sup>1</sup> H NMR                                                                                                                                              | <sup>13</sup> C NMR                                                                 | IR                                | MS                                                        |
|----------|-----------------------------------------------------------------------------------------------------------------------------------------------------------------|-------------------------------------------------------------------------------------|-----------------------------------|-----------------------------------------------------------|
| <b>I</b> | 7.31-7.29 (2H, m),<br>7.20-7.18 (2H, m),<br>7.12-7.14 (1H, m),<br>4.09-4.11 (4H, m),<br>1.62-1.66 (4H, m),<br>1.26-1.24 (20H, m),<br>0.85 (6H, t, <i>J</i> 5Hz) | 151.0, 129.8,<br>125.1, 120.2,<br>68.8, 31.9,<br>30.5, 29.3,<br>25.6, 22.8,<br>14.2 | 2927, 1491,<br>1213, 1024,<br>945 | Calc (M+Na) <sup>+</sup><br>398.2586<br><br>Expt 398.2582 |
| <b>J</b> | 7.33-7.30 (2H, m),<br>7.21-7.14 (3H, m),                                                                                                                        | 150.7, 132.2,<br>129.7, 125.1,                                                      | 3079, 2880,<br>1594, 1486,        | Calc (M+Na) <sup>+</sup>                                  |

|  |                                                                                     |                       |                     |                           |
|--|-------------------------------------------------------------------------------------|-----------------------|---------------------|---------------------------|
|  | 5.94-5.90 (2H, m),<br>5.37-5.34 (2H, m),<br>5.25-5.23 (2H, m),<br>4.63-4.62 (4H, m) | 120.1, 118.6,<br>68.8 | 1282, 1207,<br>1017 | 277.0606<br>Expt 277.0607 |
|--|-------------------------------------------------------------------------------------|-----------------------|---------------------|---------------------------|

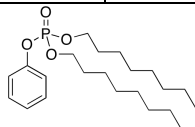

SAR70 <sup>1</sup>H NMR Spectrum

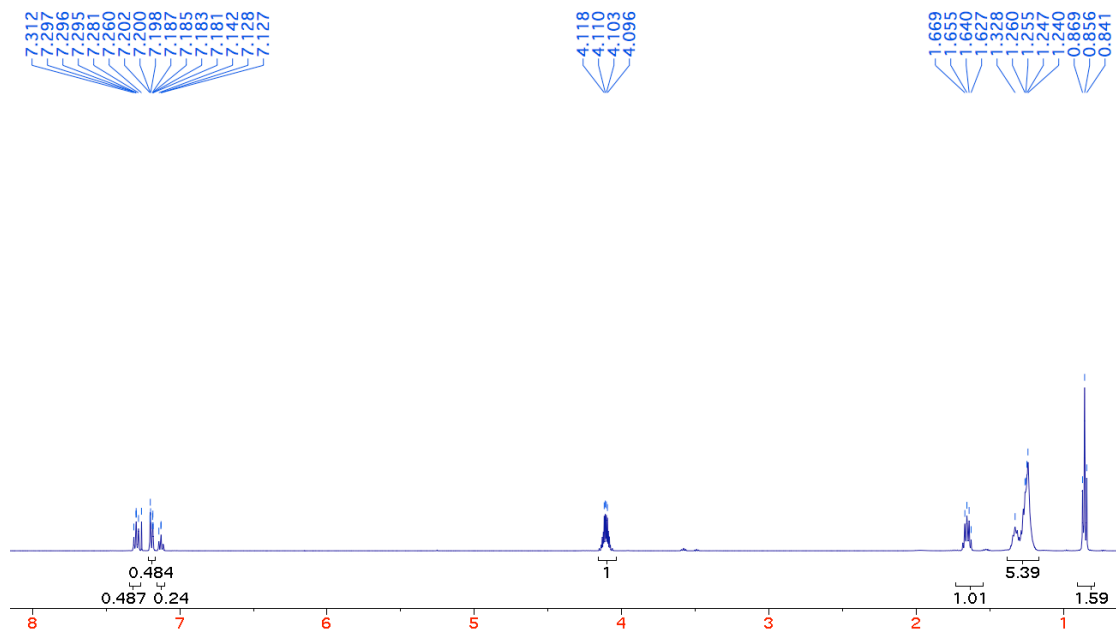

<sup>13</sup>C NMR Spectrum

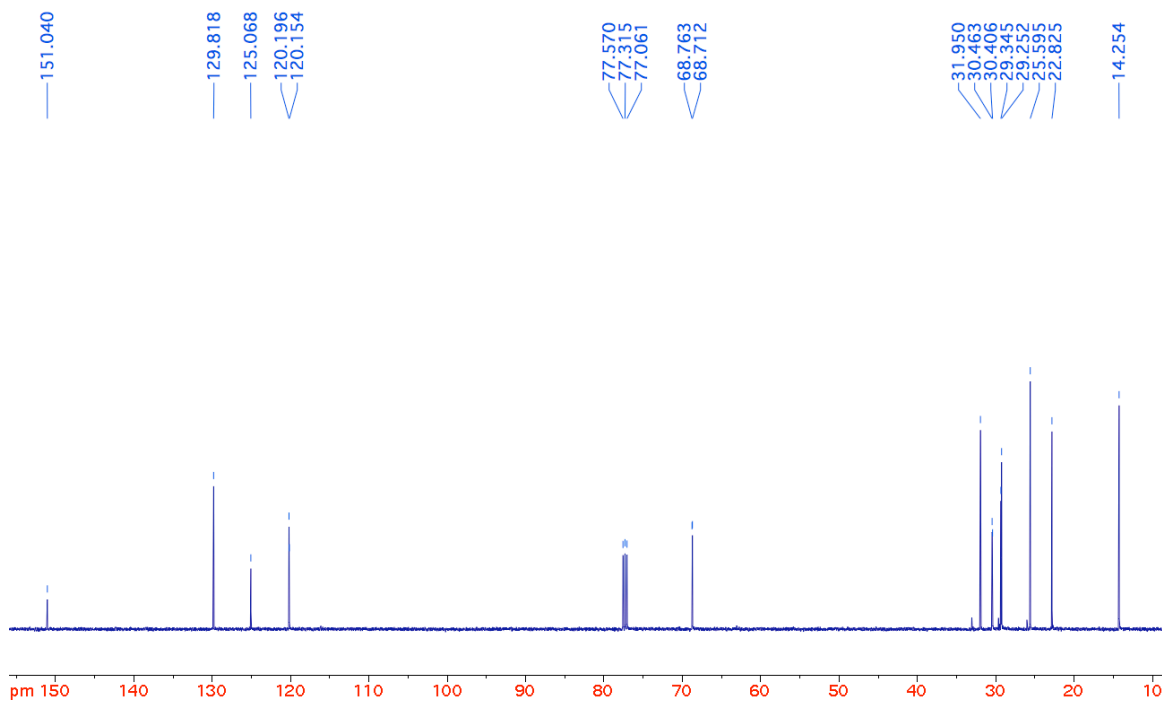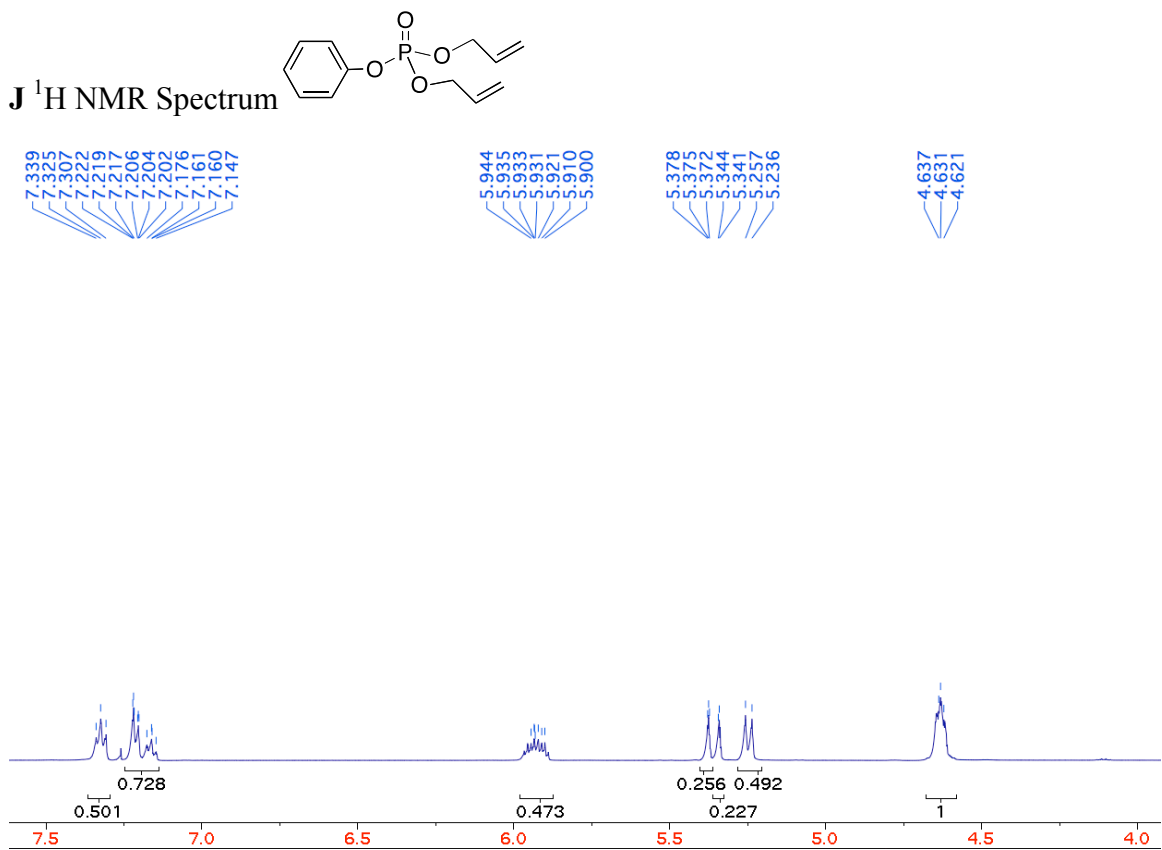

$^{13}\text{C}$  NMR Spectrum

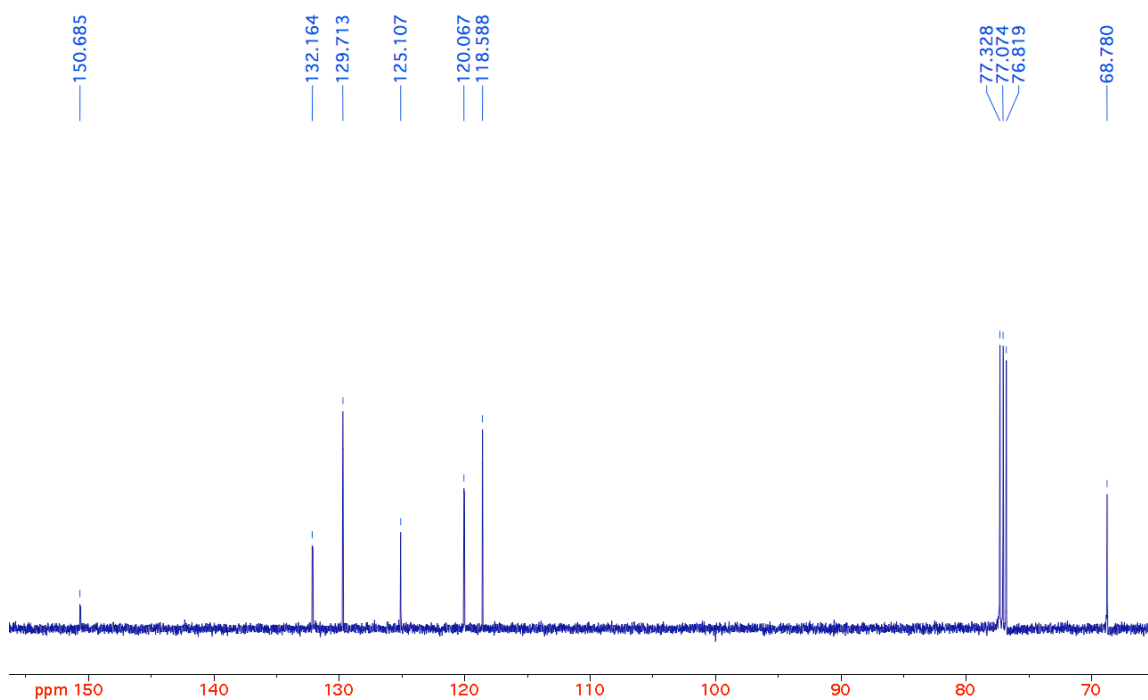

### Group III

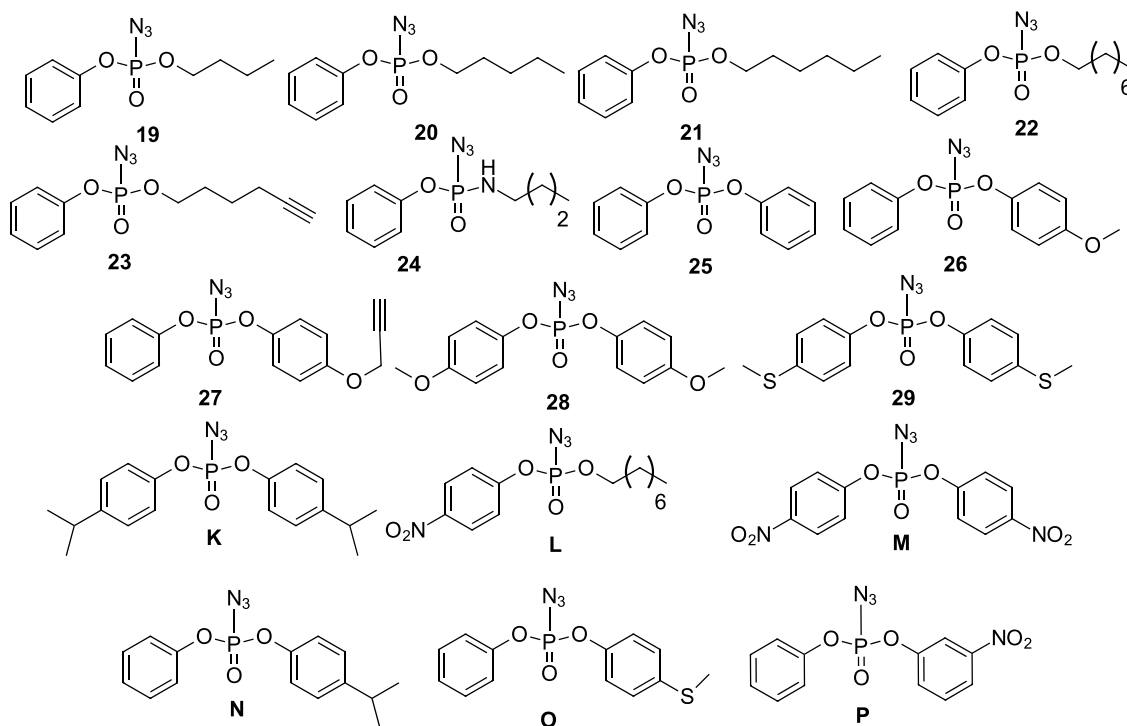

Molecules **M** and **25** are commercially available.



| <b>Molecule</b> | <b><sup>1</sup>H NMR</b>                                                                                                                        | <b><sup>13</sup>C NMR</b>                                                              | <b>IR</b>                                | <b>MS</b>                                             |
|-----------------|-------------------------------------------------------------------------------------------------------------------------------------------------|----------------------------------------------------------------------------------------|------------------------------------------|-------------------------------------------------------|
| <b>19</b>       | 7.40-7.37 (2H, m),<br>7.28-7.24 (3H, m),<br>4.28-4.24 (2H, m),<br>1.77-1.71 (2H, m),<br>1.46-1.42 (4H, m), 0.96<br>(3H, t, J 5Hz)               | 150.2, 130.2,<br>126.1, 120.4,<br>69.7, 32.3, 18.8,<br>13.7                            | 2970,2164,<br>1511, 1209                 | Calc (M+Na) <sup>+</sup><br>278.0670<br>Expt 278.0673 |
| <b>20</b>       | 7.41-7.38 (2H, m),<br>7.28-7.25 (3H, m),<br>4.28-4.23 (2H, m),<br>1.78-1.75 (2H, m),<br>1.39-1.35 (4H, m), 0.93<br>(3H, t, J 5Hz)               | 150.0, 130.0,<br>125.8, 120.2,<br>69.8, 31.2, 30.0,<br>24.9, 22.5, 14.0                | 2962, 2171,<br>1589, 1216                | Calc (M+Na) <sup>+</sup><br>292.0827<br>Expt 292.0829 |
| <b>21</b>       | 7.37-7.34 (2H, m),<br>7.23-7.21 (3H, m),<br>4.24-4.19 (2H, m),<br>1.73-1.69 (2H, m),<br>1.38-1.27 (6H, m), 0.87<br>(3H, t, J 5Hz)               | 150.2, 130.2,<br>126.0, 120.4,<br>69.9, 31.4, 30.2,<br>25.2, 22.7, 14.2                | 2929, 2171,<br>1593, 1217                | Calc (M+Na) <sup>+</sup><br>306.2532<br>Expt 306.2530 |
| <b>22</b>       | 7.37-7.34 (2H, m),<br>7.23-7.21 (3H, m),<br>4.24-4.19 (2H, m),<br>1.73-1.70 (2H, m),<br>1.38-1.25 (10H, m),<br>0.87 (3H, t, J 5Hz)              | 150.0, 129.5,<br>125.8, 120.2,<br>69.8, 31.7, 30.1,<br>30.0, 29.1, 25.3,<br>22.6, 14.1 | 2969, 2156,<br>1588, 1291                | Calc (M+Na) <sup>+</sup><br>334.1296<br>Expt 334.1291 |
| <b>23</b>       | 7.38-7.35 (2H, m),<br>7.24-7.21 (3H, m),<br>4.28-4.24 (2H, m),<br>2.24-2.22 (2H, m), 1.98<br>(1H, s), 1.88-1.85 (2H,<br>m), 1.65-1.60 (2H, m),  | 149.9, 130.0,<br>125.9, 120.2,<br>83.4, 69.1, 60.4,<br>29.1, 24.2, 21.0,<br>17.9       | 3303, 3252,<br>2949, 2167,<br>1490, 1271 | Calc (M+H) <sup>+</sup><br>280.0846<br>Expt 280.0842  |
| <b>24</b>       | 7.37-7.34 (2H, m),<br>7.24-7.19 (2H, m), 3.14<br>(1H, bs), 3.07-3.03<br>(2H, m), 1.52-1.49(2H,<br>m), 1.37-1.33 (2H, m),<br>0.92 (3H, t, J 5Hz) | 150.4, 130.2,<br>125.8, 120.6,<br>41.7, 33.7, 19.9,<br>13.9                            | 3219, 2962,<br>2143, 1595,<br>1256       | Calc (M+Na) <sup>+</sup><br>277.0830<br>Expt 277.0825 |
| <b>26</b>       | 7.39-7.38 (3H, m),<br>7.19-7.17 (4H, m),<br>6.89-6.88 (2H, m), 3.80<br>(3H, s)                                                                  | 157.6, 150.0,<br>143.5, 130.2,<br>126.2, 121.2,<br>120.4, 115.0,<br>55.8               | 3111, 2947,<br>1589, 1339,<br>1216       | Calc (M+H) <sup>+</sup><br>306.0644<br>Expt 306.0647  |
| <b>27</b>       | 7.41-7.38 (2H, m),<br>7.26-7.22 (3H, m), 6.98                                                                                                   | 155.6, 150.0,<br>144.2, 130.2,                                                         | 3294, 3024,<br>2919, 2171,               | Calc (M+H) <sup>+</sup><br>330.0644                   |

|           |                                                                                                                                         |                                                                                        |                                         |                                                       |
|-----------|-----------------------------------------------------------------------------------------------------------------------------------------|----------------------------------------------------------------------------------------|-----------------------------------------|-------------------------------------------------------|
|           | (2H, d, J 10Hz), 4.69<br>(2H, s), 2.54<br>(4H, s)                                                                                       | 126.3, 121.4,<br>120.4, 116.3,<br>116.3, 78.3,<br>76.1, 54.5                           | 1508, 1297,<br>1161                     | Expt 330.0641                                         |
| <b>28</b> | 7.18(4H, d, J 10 Hz),<br>6.88(4H, d, J 10Hz),<br>3.77(6H, s)                                                                            | 157.0, 144.2,<br>121.1, 114.7,<br>55.6                                                 | 3073, 2837,<br>2157, 1501,<br>1300, 958 | Calc (M+Na) <sup>+</sup><br>358.0569<br>Expt 358.0565 |
| <b>29</b> | 7.26(2H, d, J 10Hz),<br>7.16(2H, d, J 10Hz),<br>2.42(6H, s)                                                                             | 157.0, 144.2,<br>121.1, 114.7,<br>55.6                                                 | 2170, 1487,<br>1191, 967                | Calc (M+Na) <sup>+</sup><br>390.0079<br>Expt 390.0078 |
| <b>K</b>  | 7.24-7.20 (4H, m), 2.92<br>(2H, m), 3.77(6H, d, J<br>5Hz)                                                                               | 147.9, 146.7,<br>127.9, 120.0,<br>33.6, 23.9                                           | 2962, 2100,<br>1506, 974                | Calc (M+Na) <sup>+</sup><br>382.1296<br>Expt 382.1283 |
| <b>L</b>  | 8.27 (2H, d, J 10Hz),<br>7.40 (2H, d, J 10Hz),<br>4.30-4.25 (2H, m),<br>1.77-1.72 (2H, m),<br>1.28-1.26(10H, m),<br>0.88 (3H, t, J 5Hz) | 154.5, 145.3,<br>125.8, 120.9,<br>70.4, 31.7, 30.0,<br>29.1, 28.9, 25.2,<br>22.6, 14.0 | 2929, 2170,<br>1526, 1348,<br>1025      | Calc (M+Na) <sup>+</sup><br>379.1147<br>Expt 379.1149 |
| <b>N</b>  | 7.42-7.19 (9H, m),<br>2.93-2.92 (1H, m), 1.27<br>(6H, d, J 5Hz)                                                                         | 146.8, 130.0,<br>127.9, 126.1,<br>120.3, 120.0,<br>33.6, 24.0                          | 3097, 2917,<br>2158, 1589,<br>1190      | Calc (M+Na) <sup>+</sup><br>340.0827<br>Expt 340.0824 |
| <b>O</b>  | 7.42-7.19 (5H, m),<br>7.22-7.21 (4H, m), 2.50<br>(3H, s)                                                                                | 149.9, 147.5,<br>136.4, 130.1,<br>128.4, 126.1,<br>120.8, 16.4                         | 3014, 2962,<br>2171, 16112,<br>1112     | Calc (M+H) <sup>+</sup><br>322.0415<br>Expt 322.0416  |
| <b>P</b>  | 8.28-8.26 (3H, m),<br>7.43-7.39 (3H, m),<br>7.25-7.24 (3H, m)                                                                           | 154.5, 149.8,<br>145.5, 130.3,<br>126.0, 120.8,<br>119.9, 115.6                        | 3067, 2955,<br>2156, 1589,<br>1196      | Calc 329.0389<br>Expt 329.0385                        |

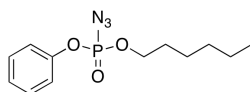

**19** <sup>1</sup>H NMR Spectrum

SAR132

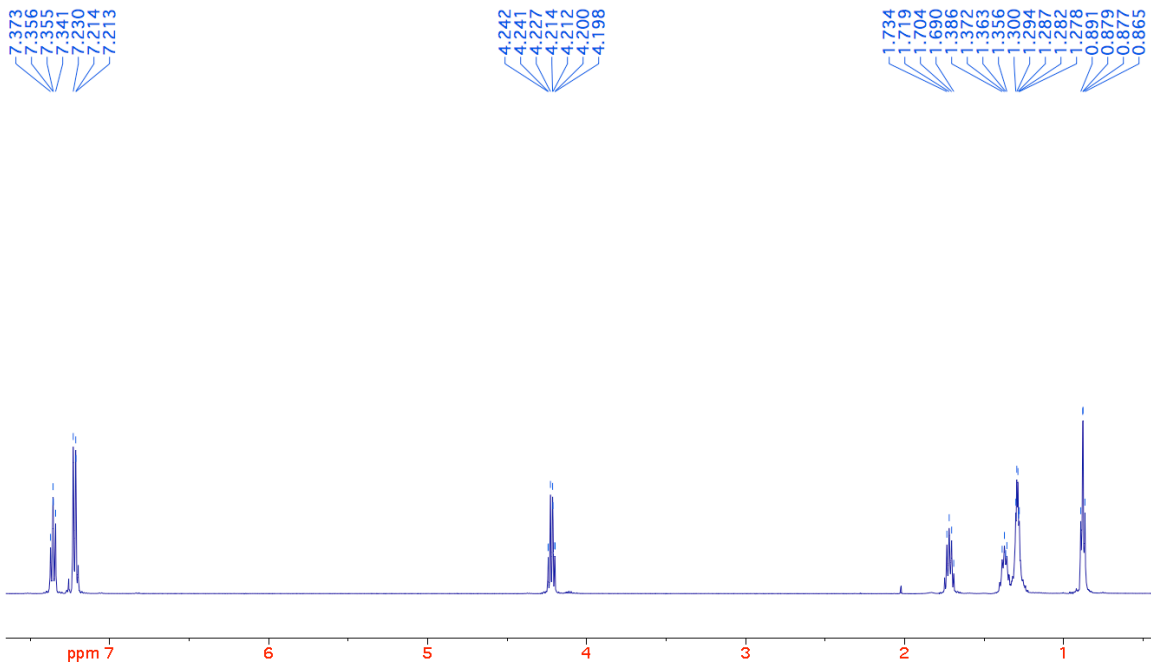

<sup>13</sup>C NMR Spectrum

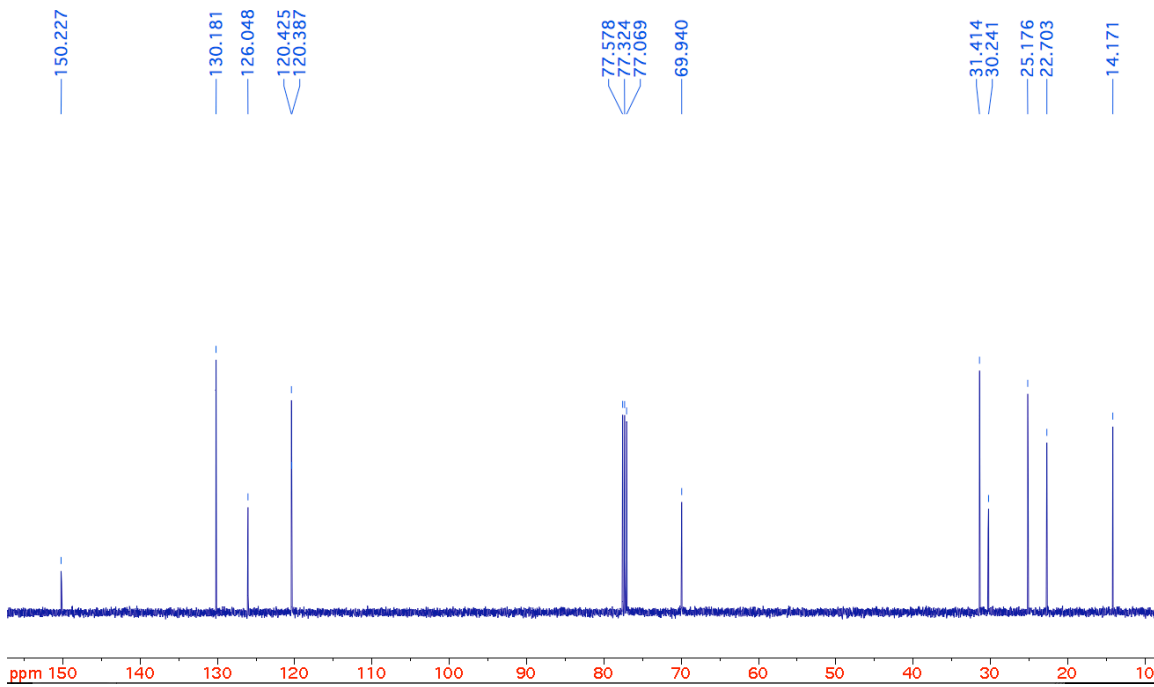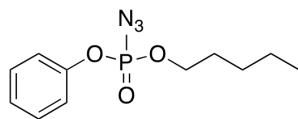

<sup>1</sup>H NMR Spectrum

SAR134

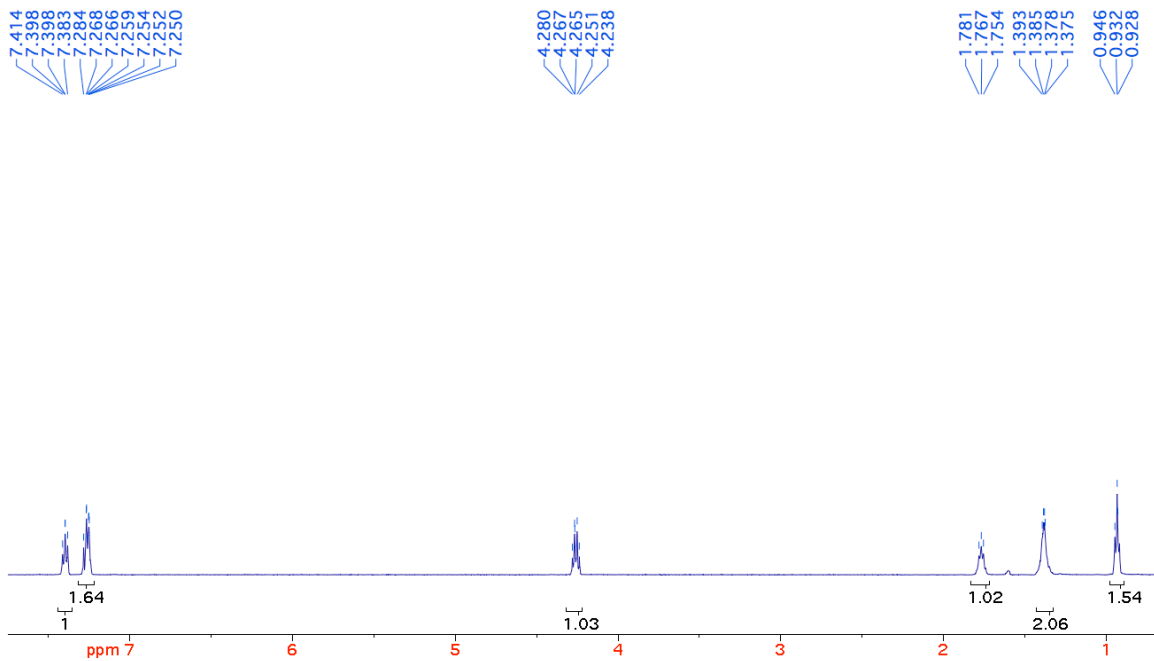

<sup>13</sup>C NMR Spectrum

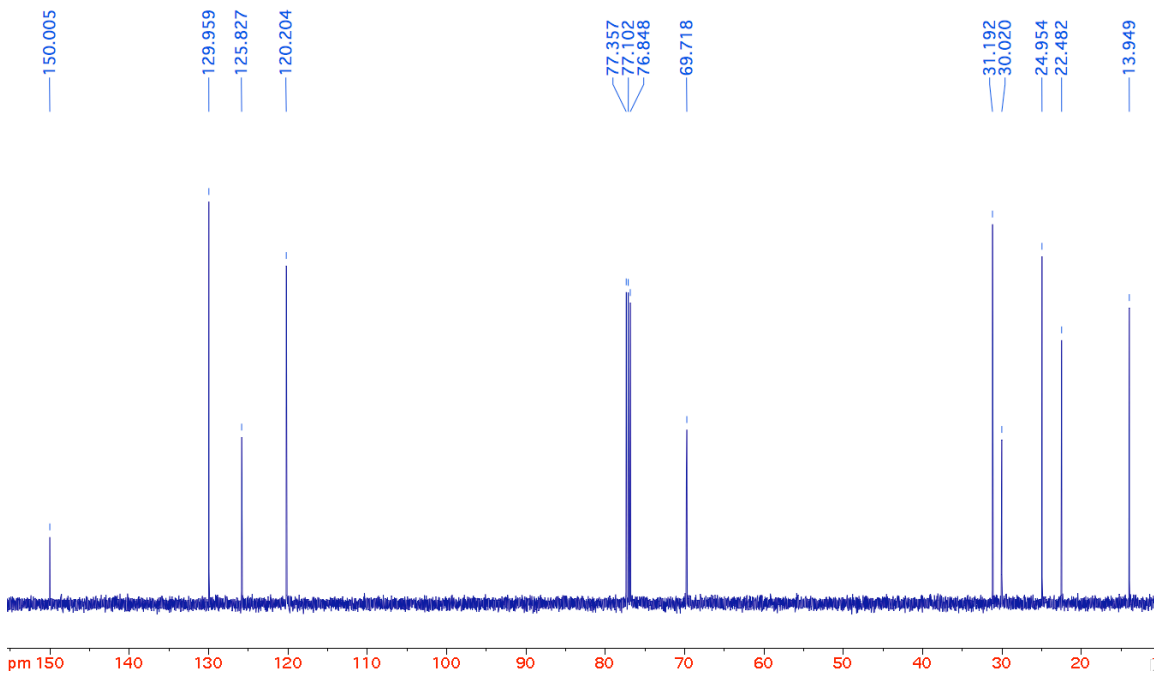

21 <sup>1</sup>H NMR Spectrum

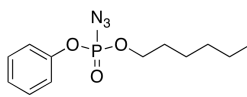

SAR132



<sup>13</sup>C NMR Spectrum

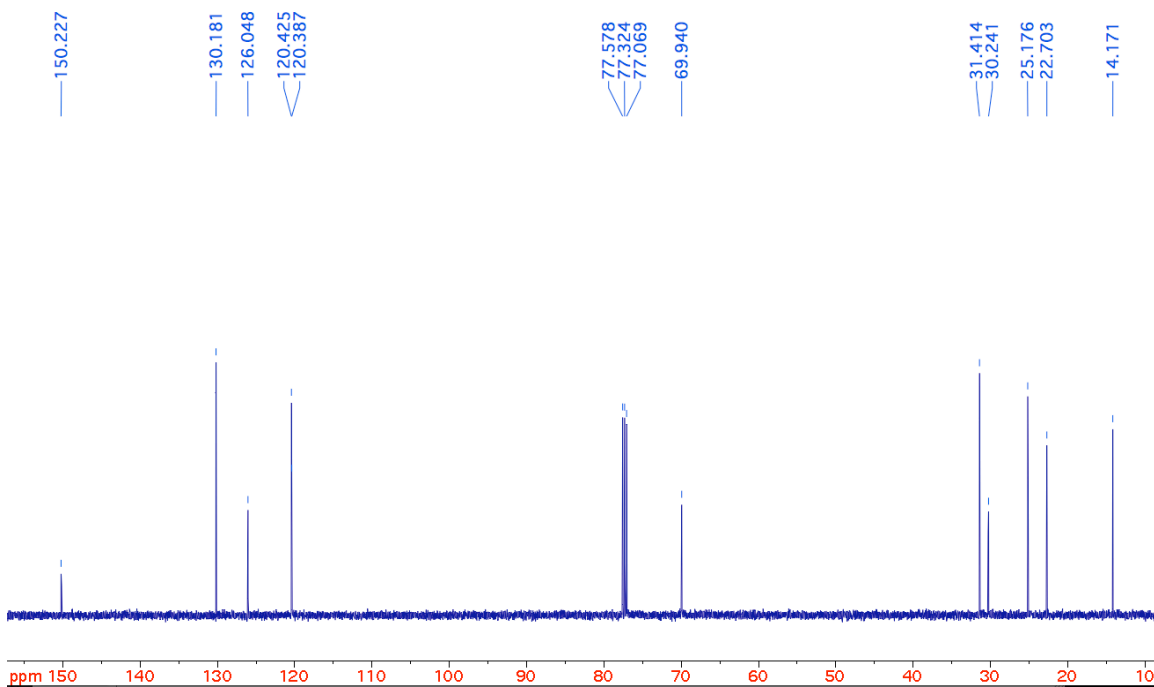

22 <sup>1</sup>H NMR Spectrum

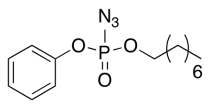

SAR133

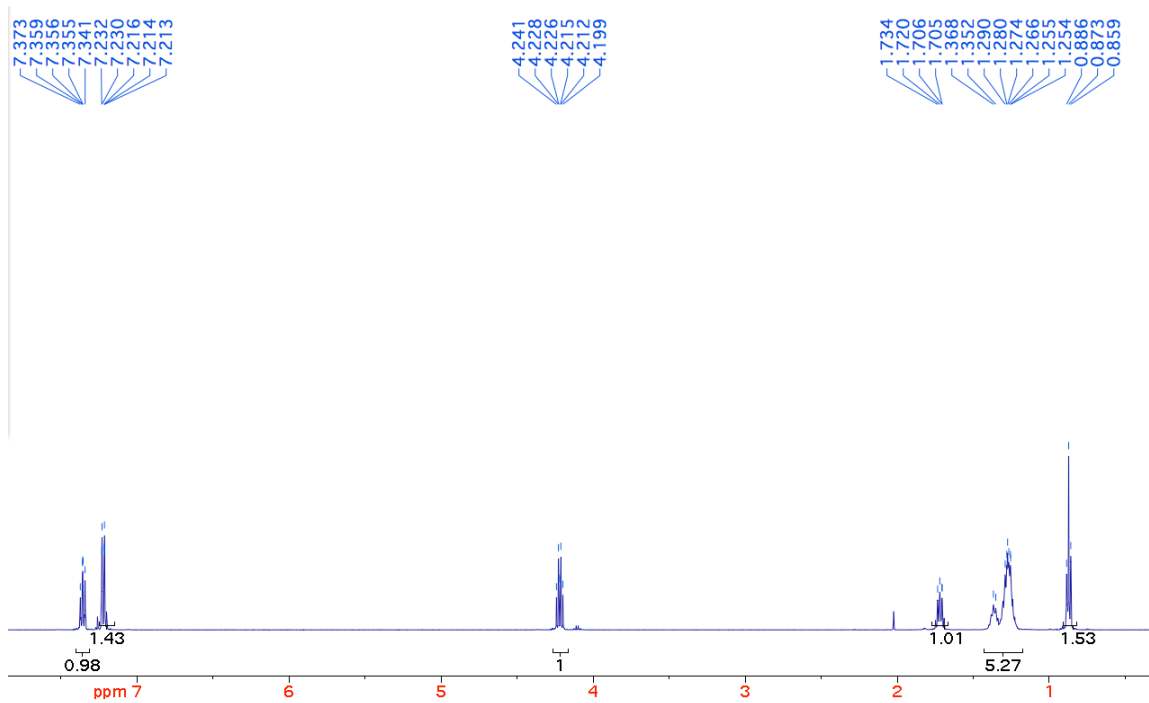

<sup>13</sup>C NMR Spectrum

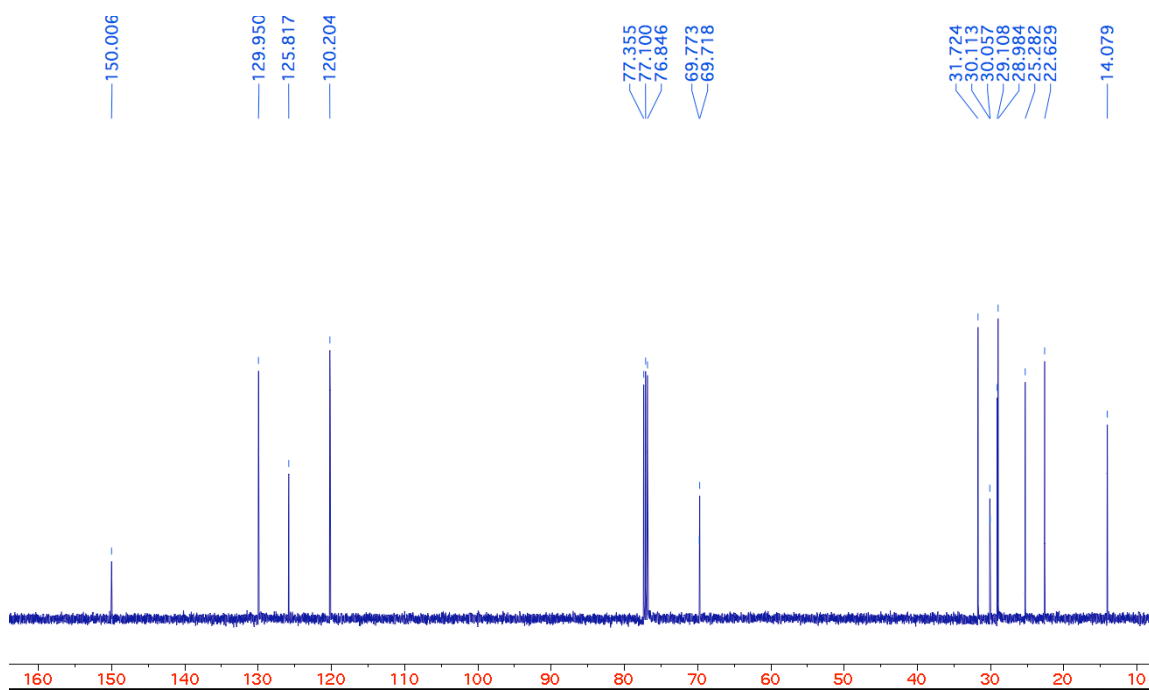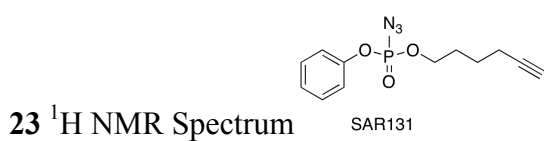

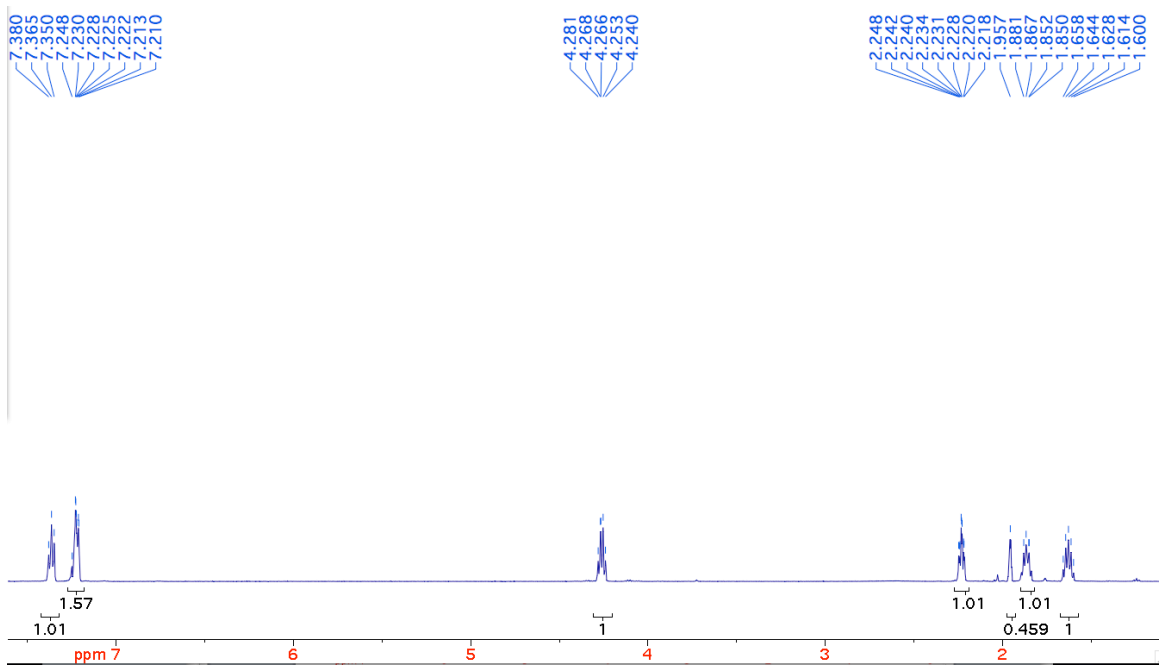

$^{13}\text{C}$  NMR Spectrum

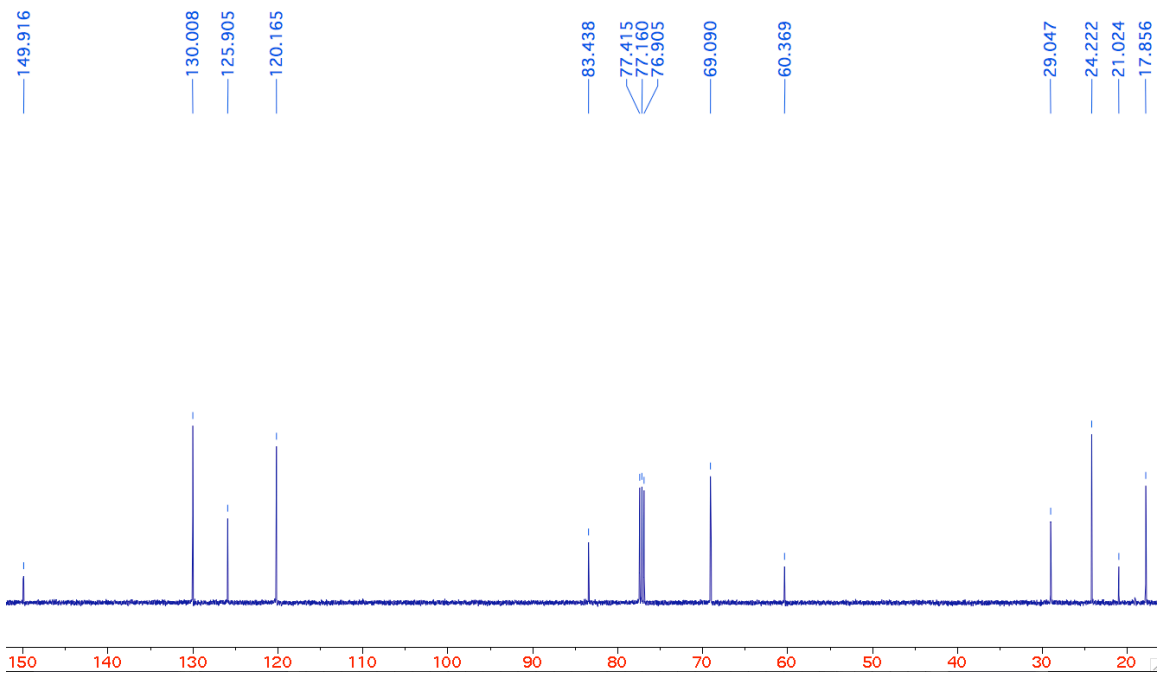

$^1\text{H}$  NMR Spectrum

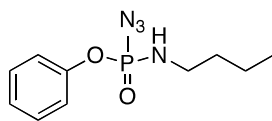

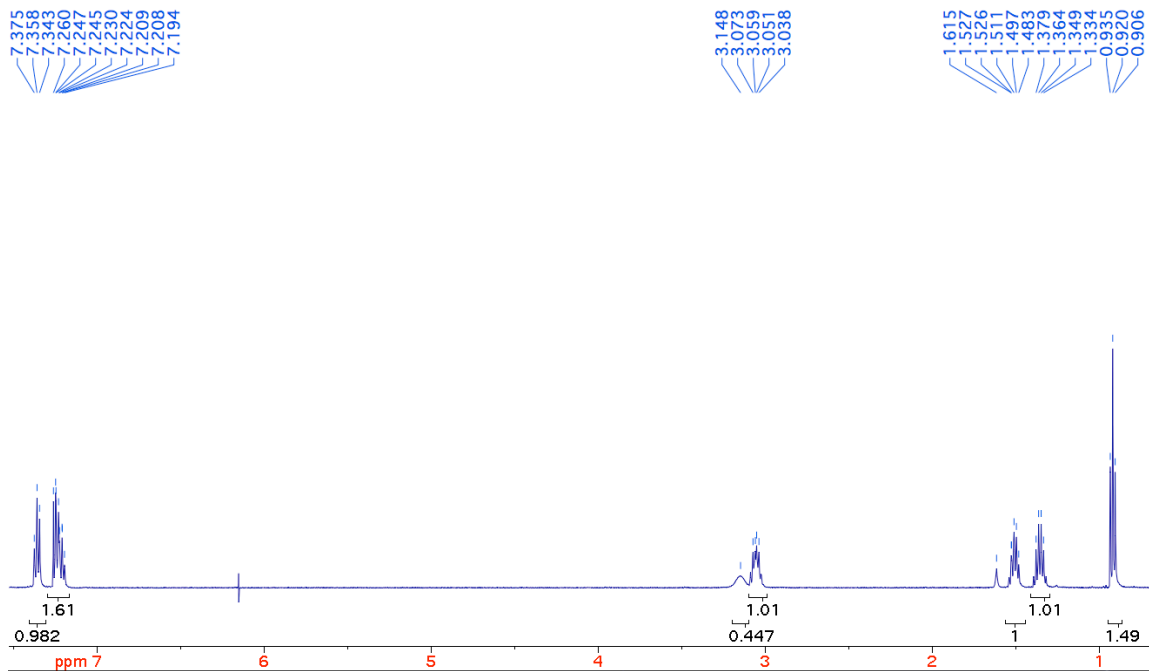

**<sup>13</sup>C NMR Spectrum**

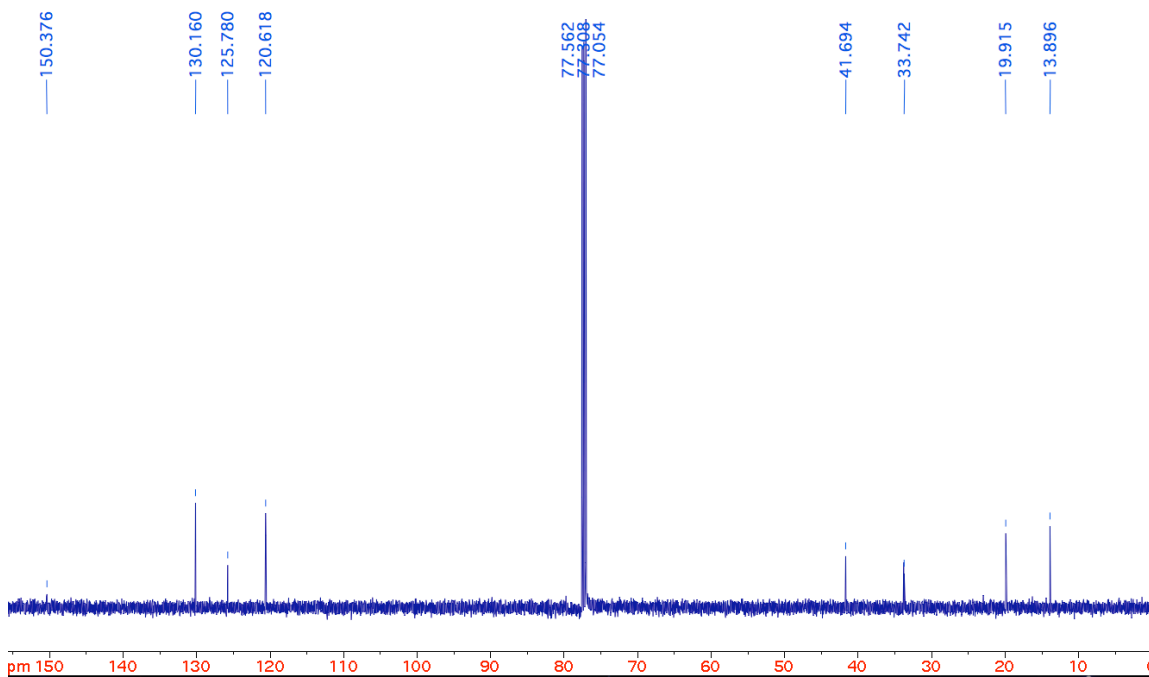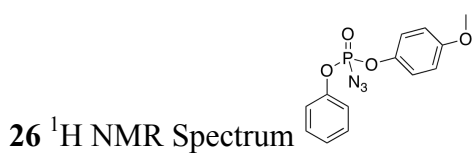



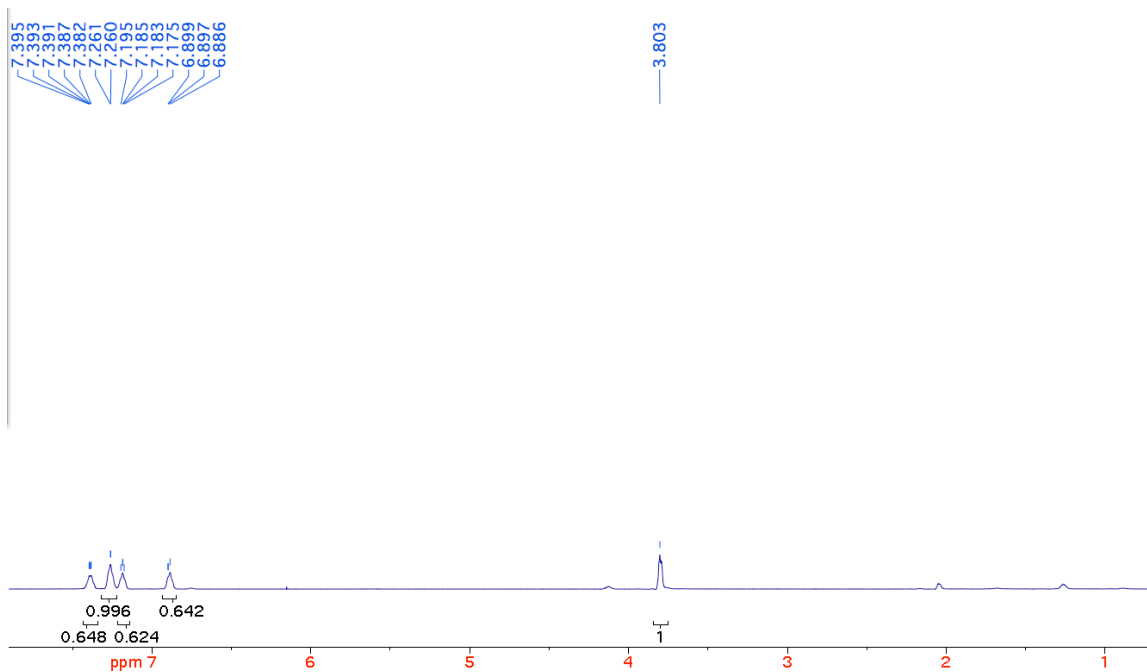

<sup>13</sup>C NMR Spectrum

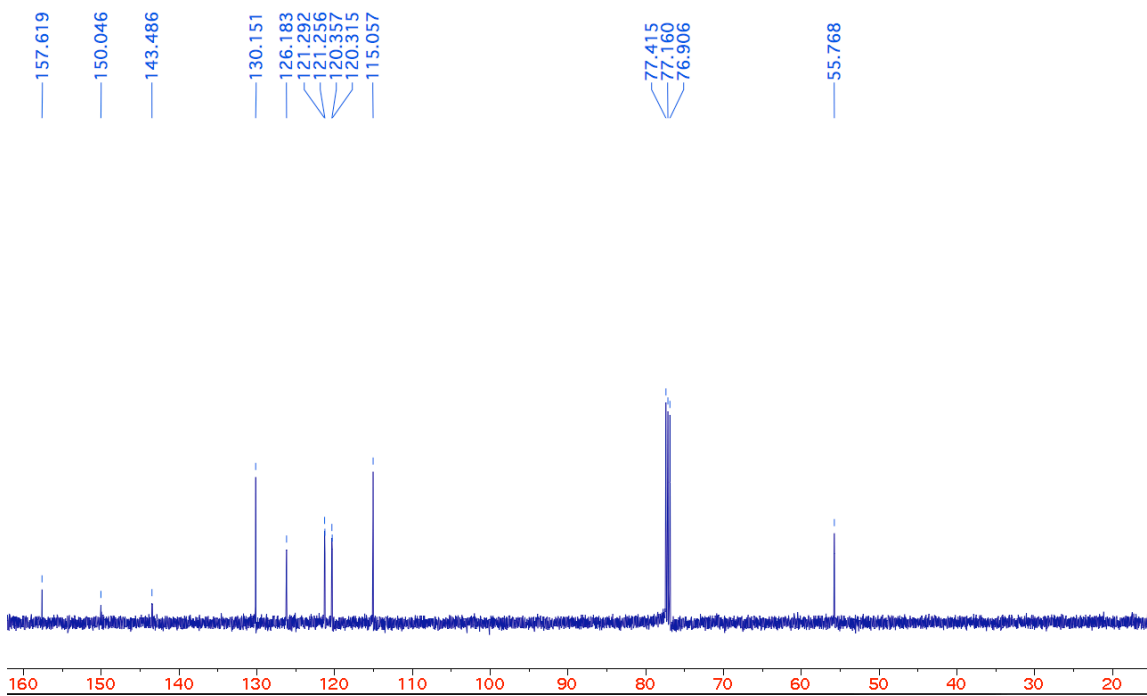

<sup>27</sup>H NMR Spectrum

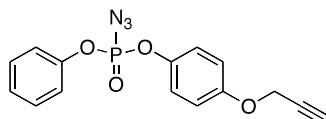

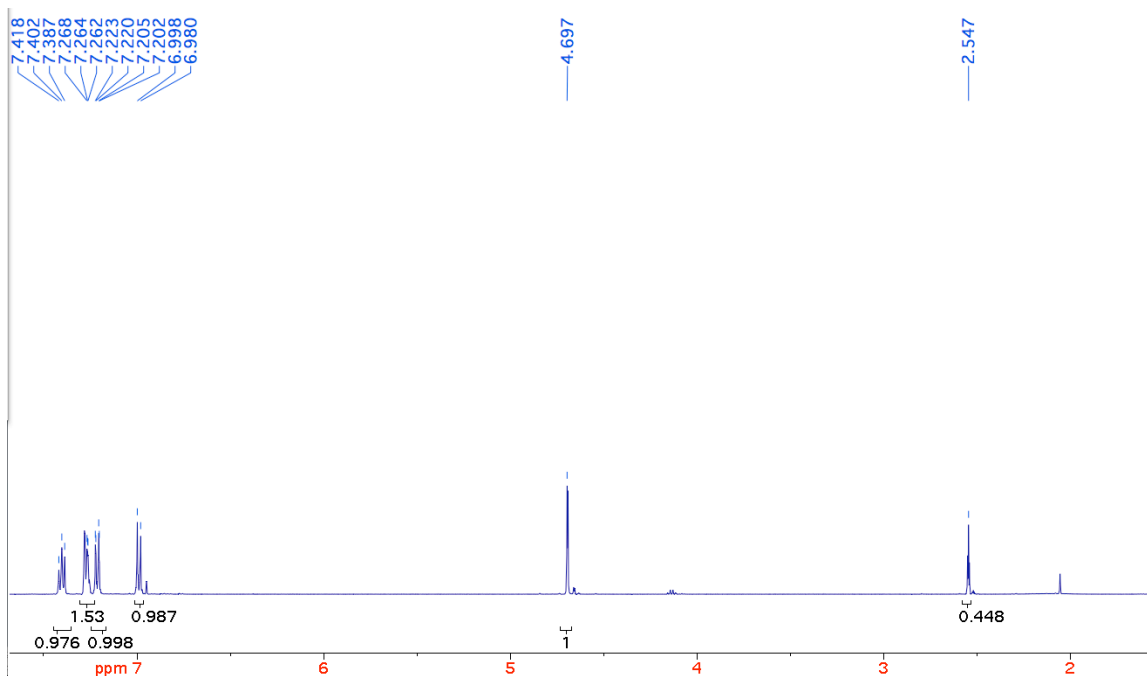

<sup>13</sup>C NMR Spectrum

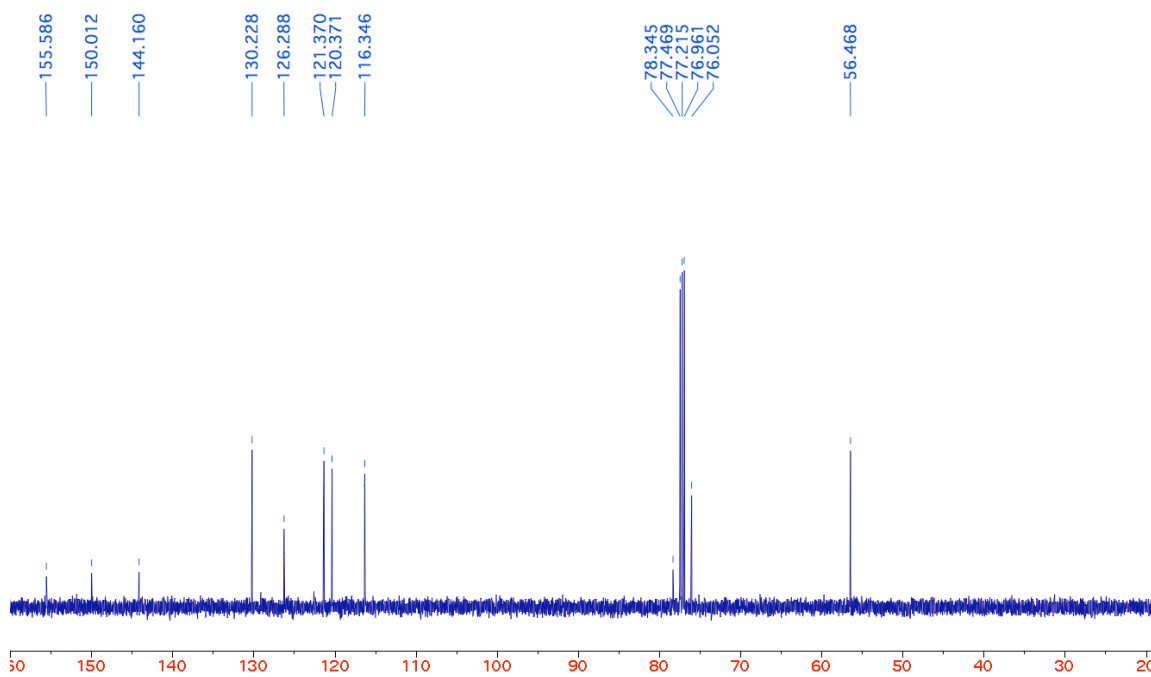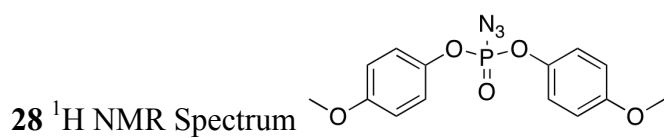

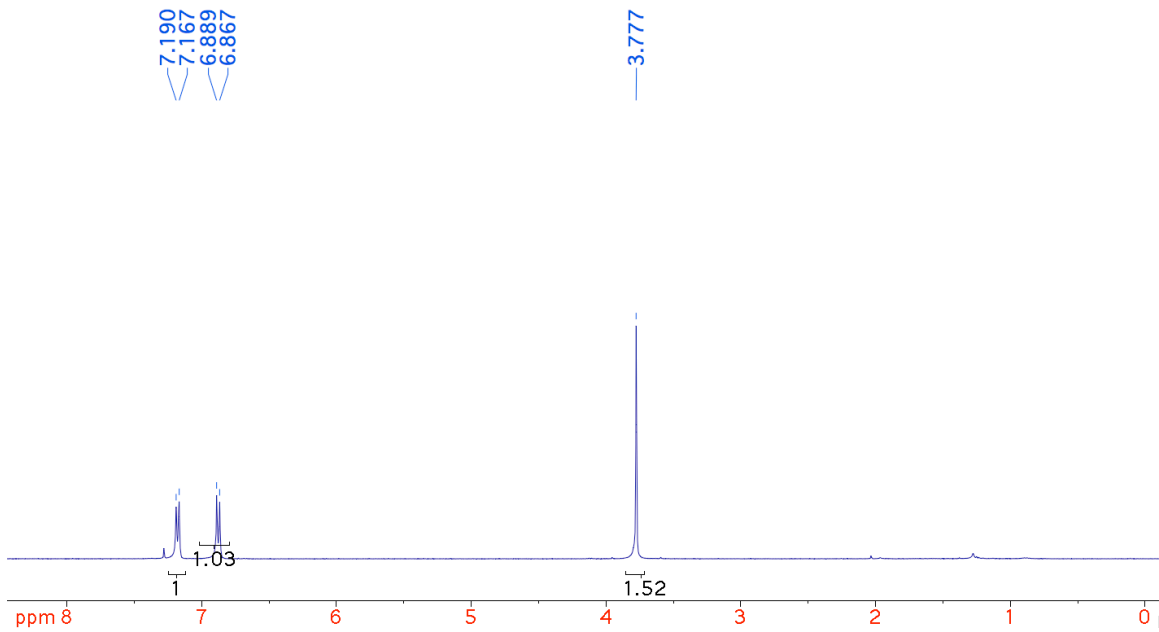

$^{13}\text{C}$  NMR Spectrum

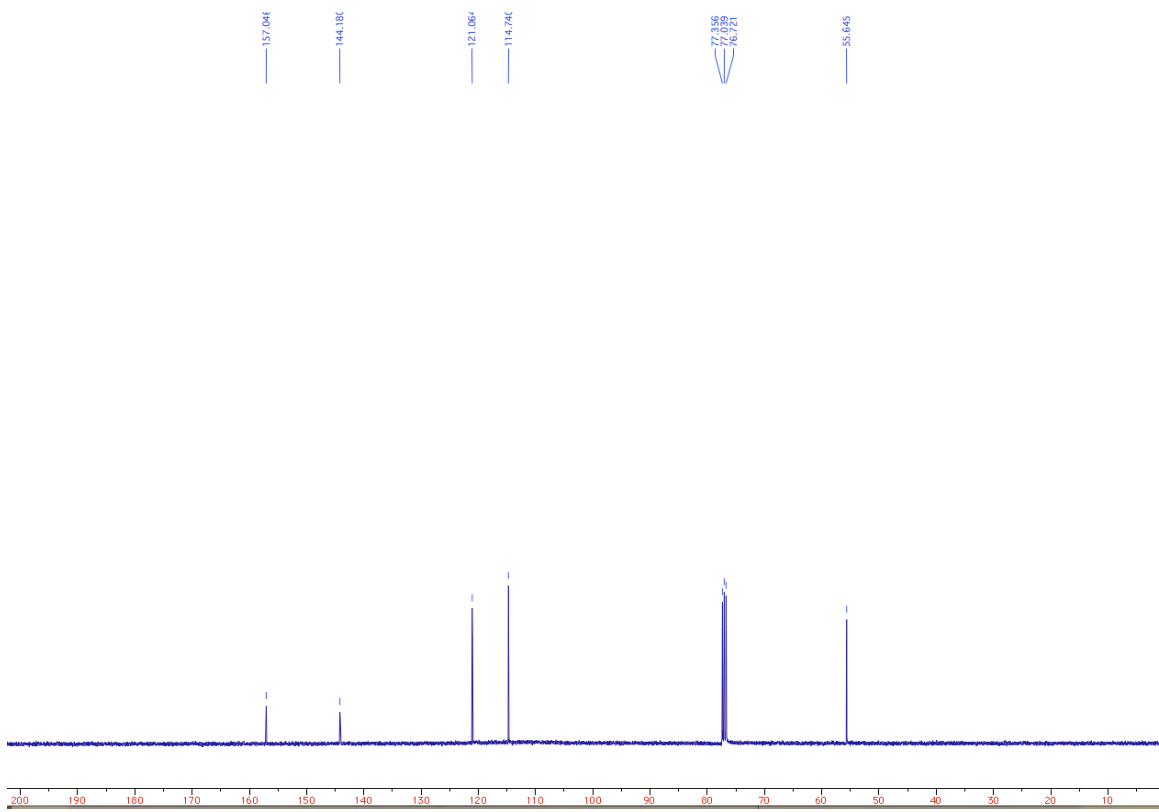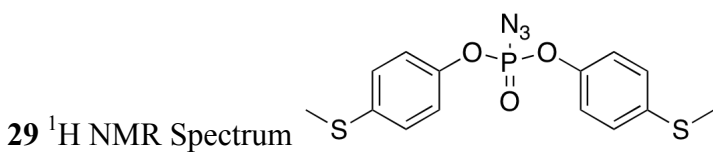

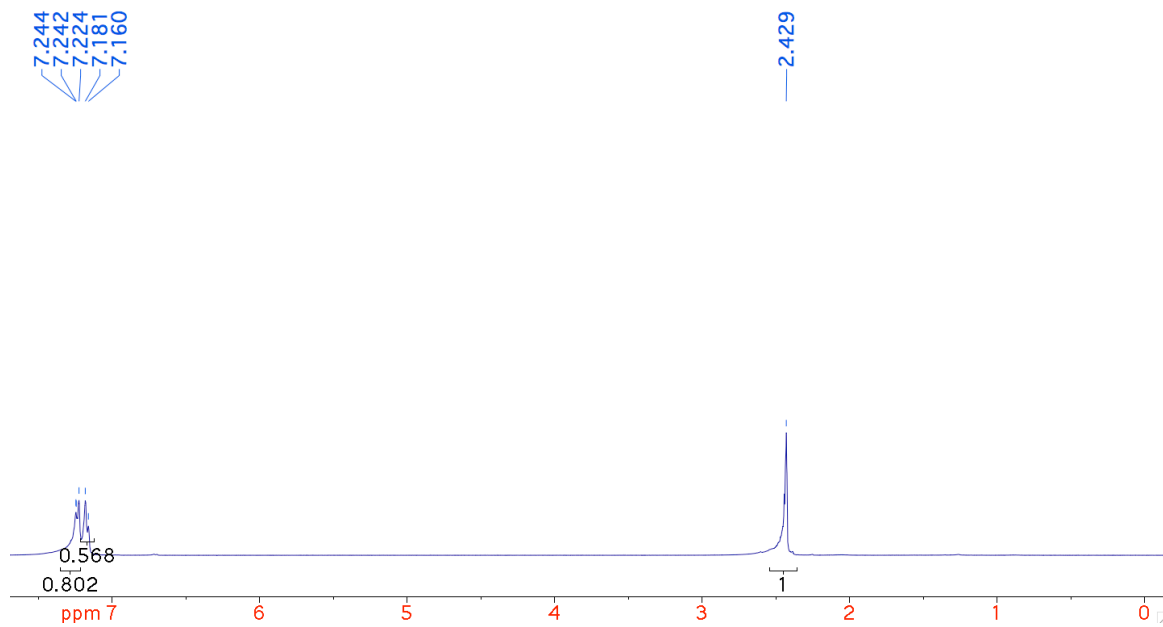

$^{13}\text{C}$  NMR Spectrum

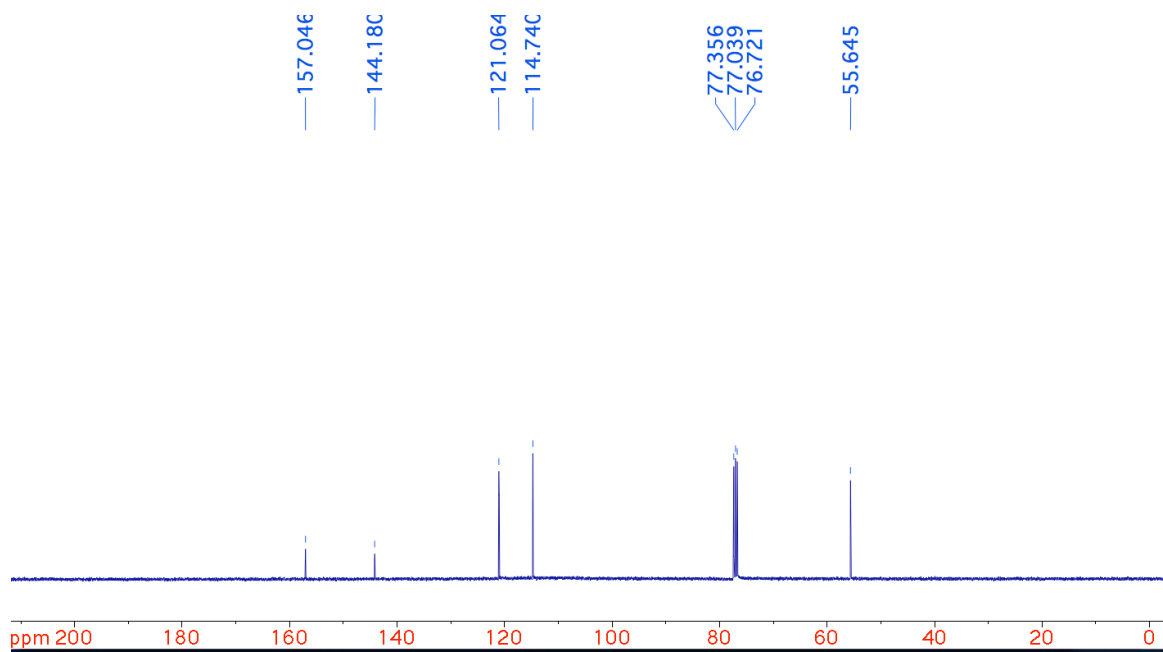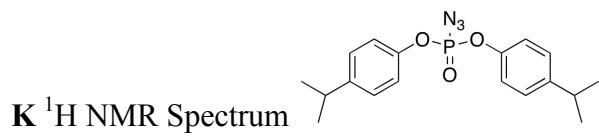

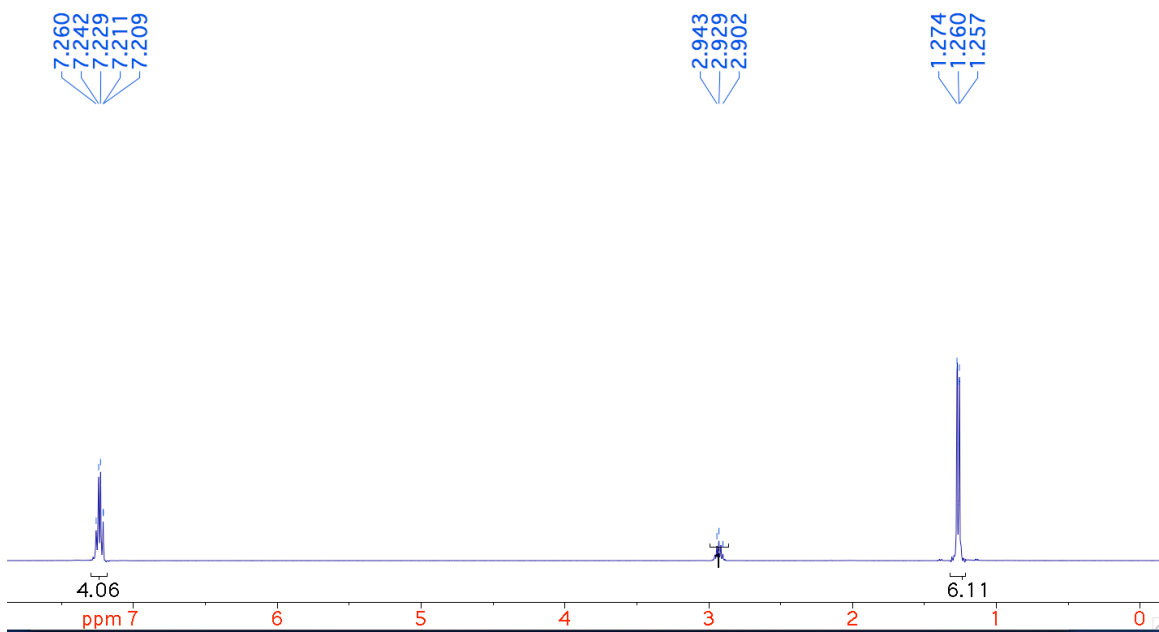

<sup>13</sup>C NMR Spectrum

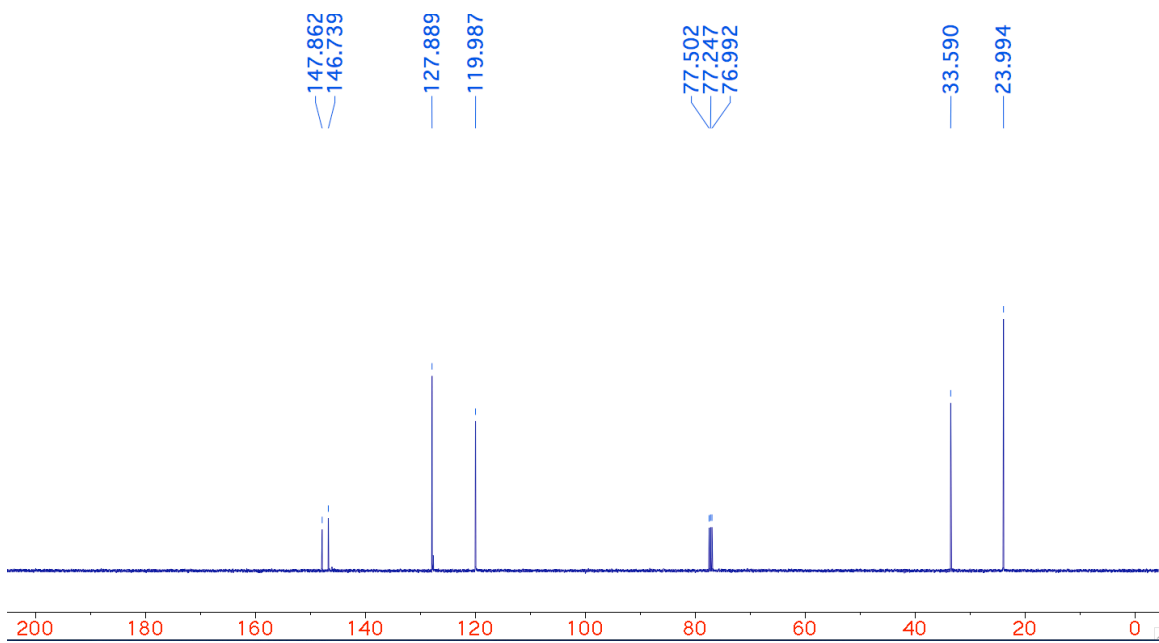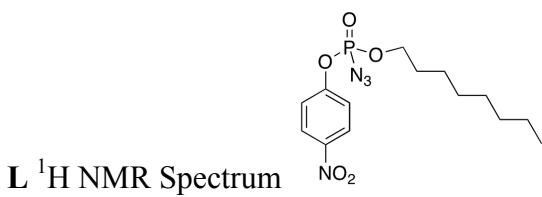

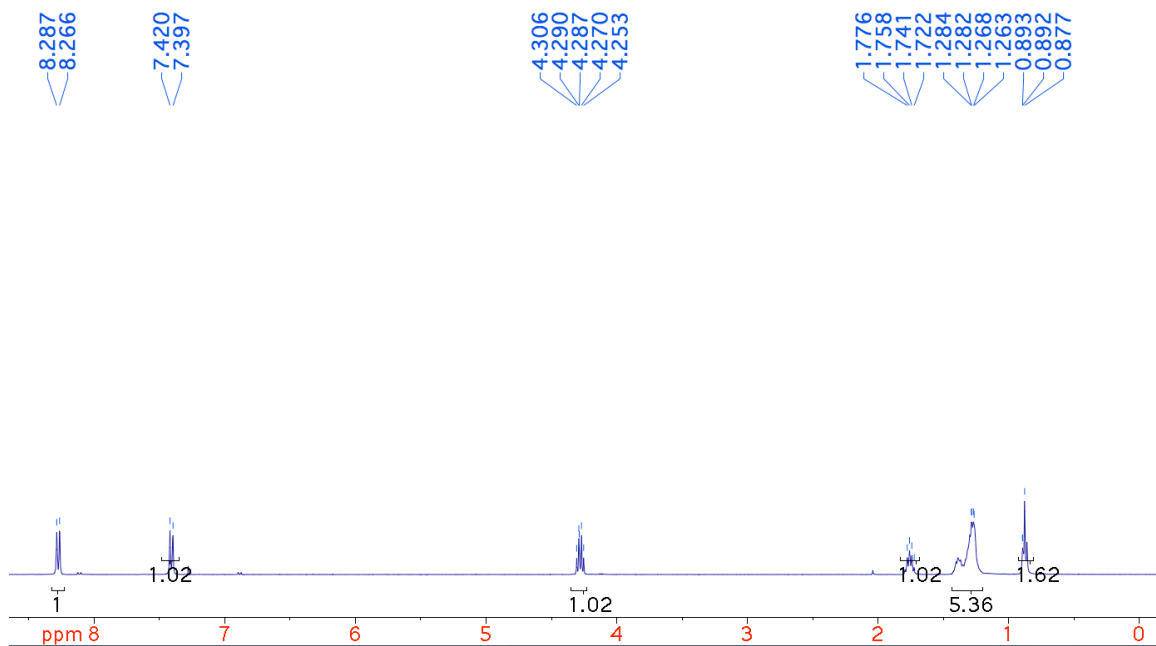

$^{13}\text{C}$  NMR Spectrum

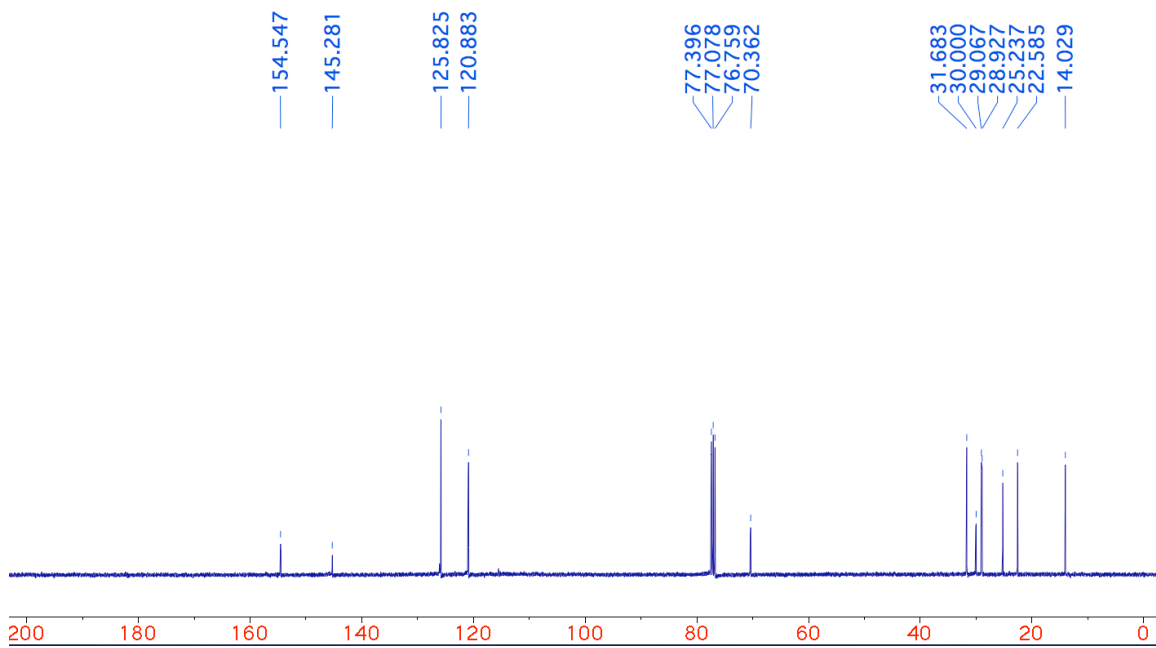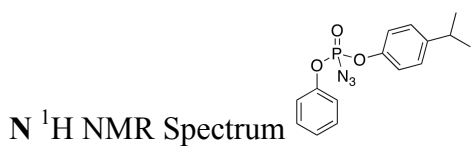

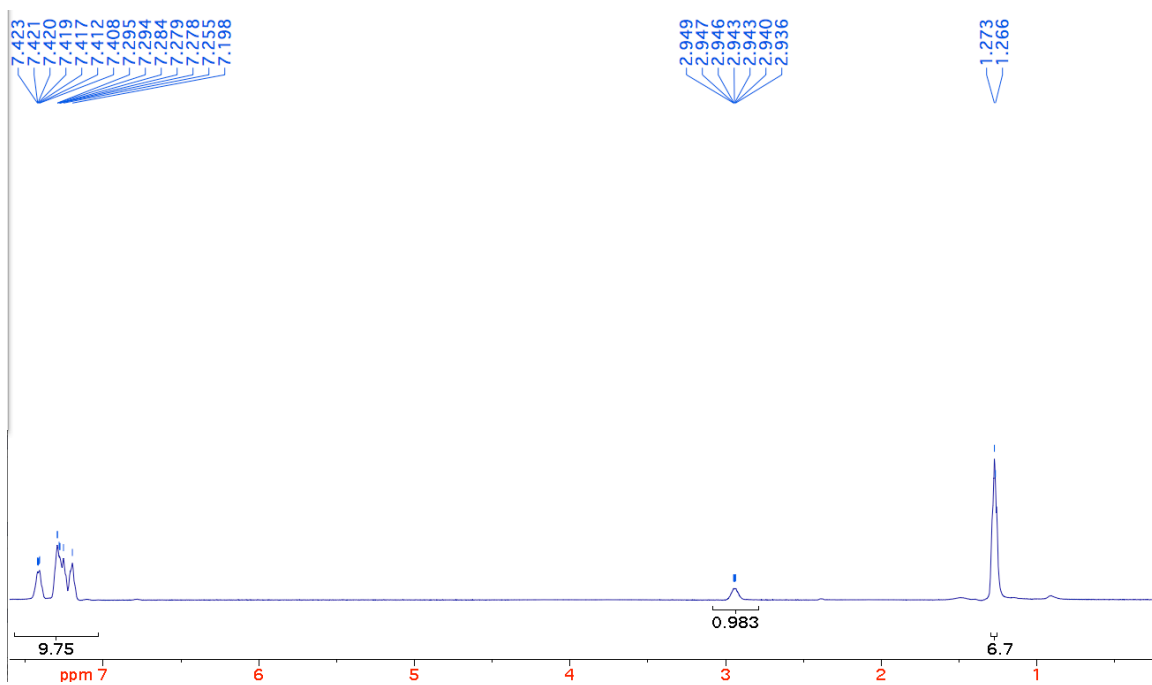

<sup>13</sup>C NMR Spectrum

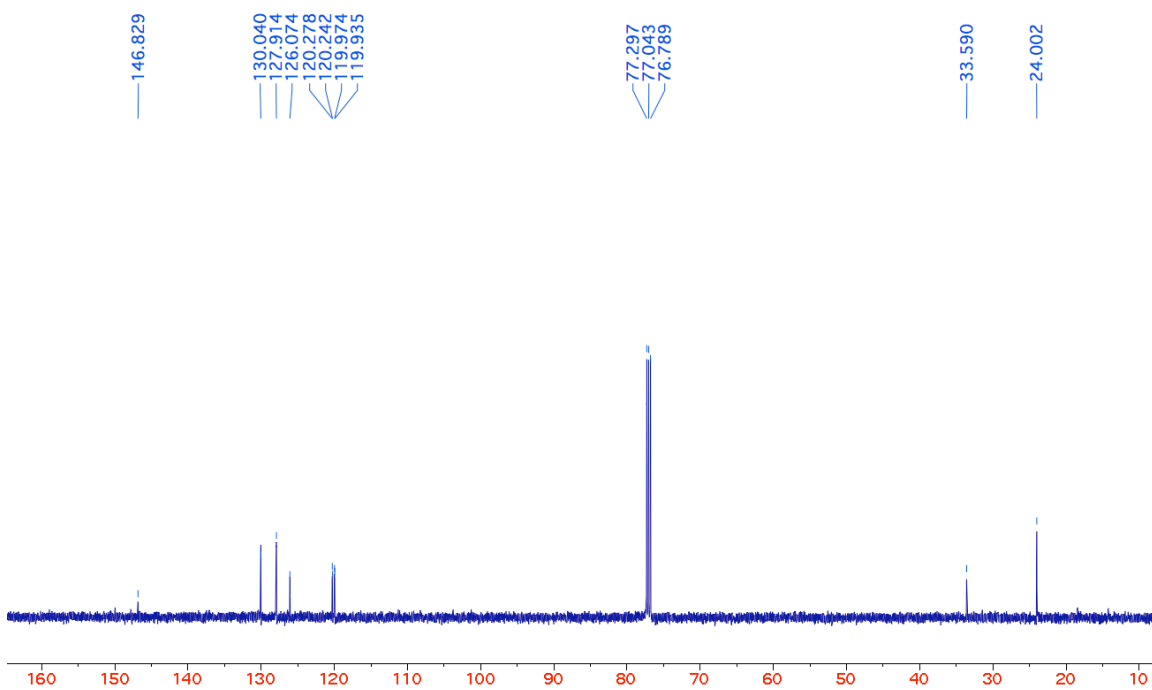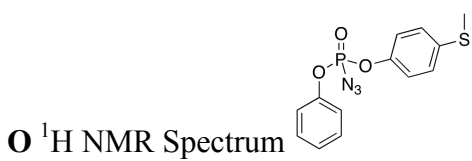

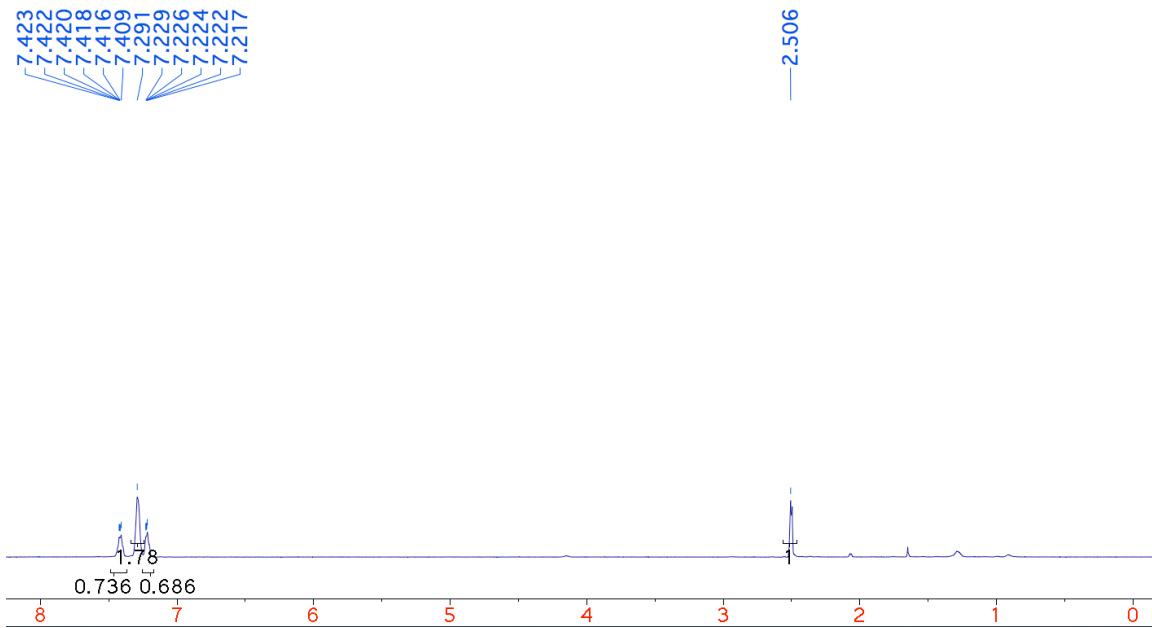

<sup>13</sup>C NMR Spectrum

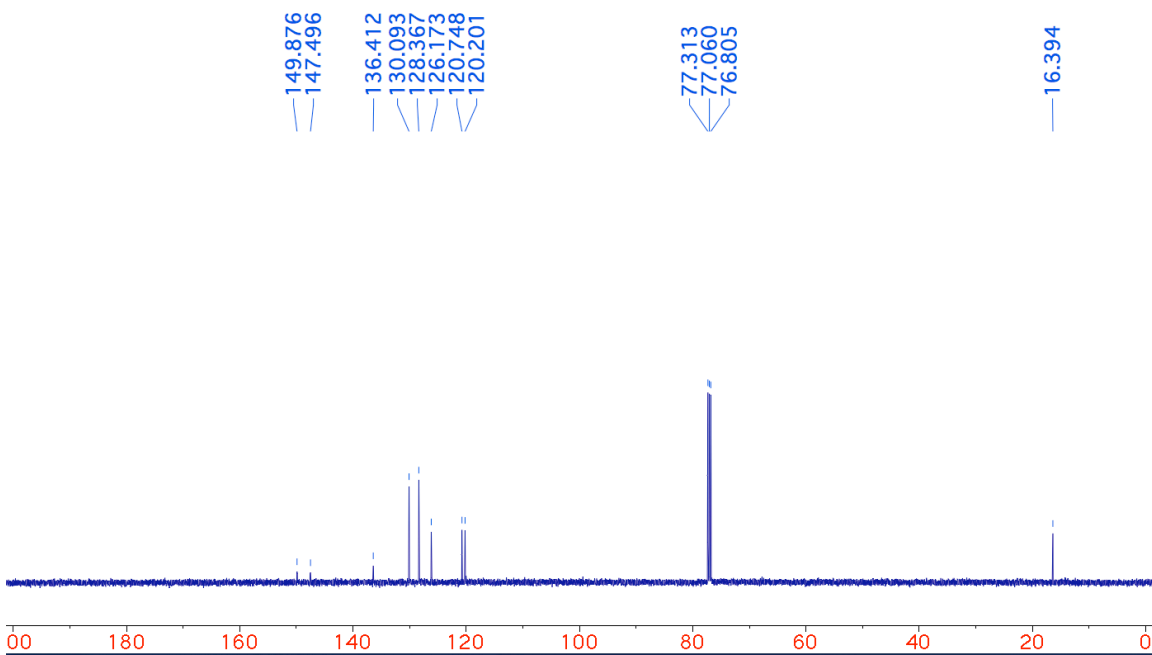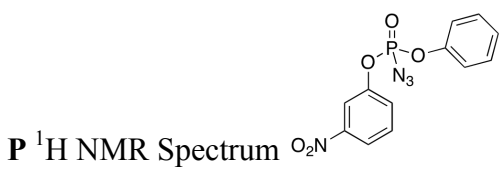



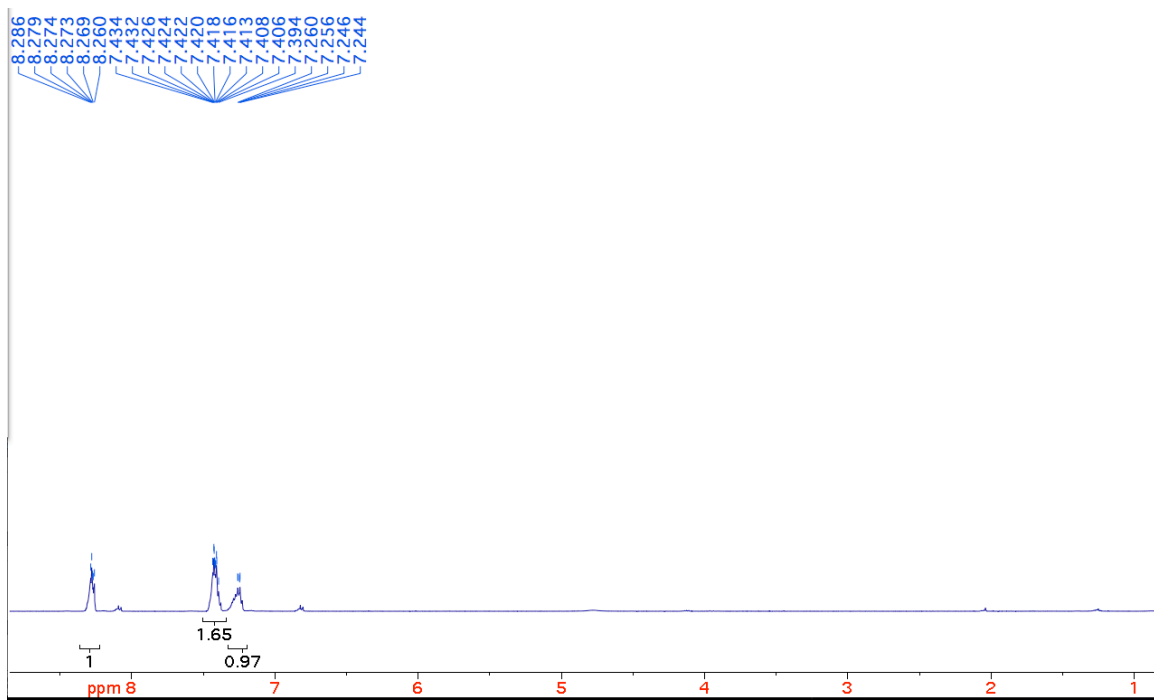

$^{13}\text{C}$  NMR Spectrum

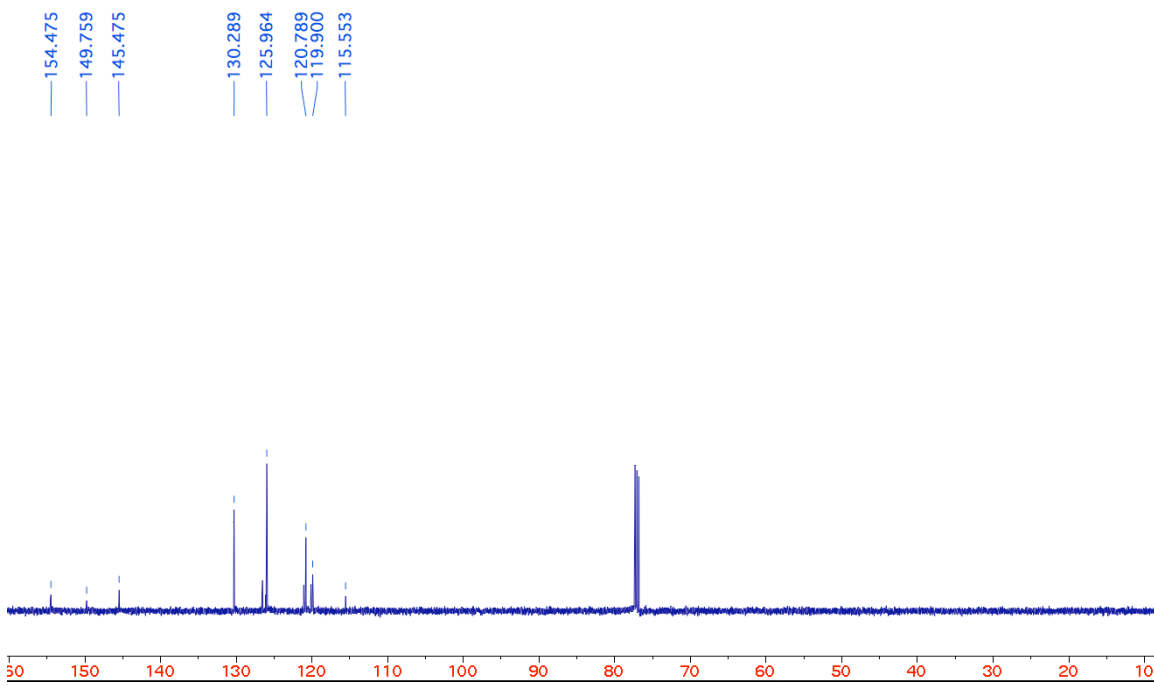

Group IV

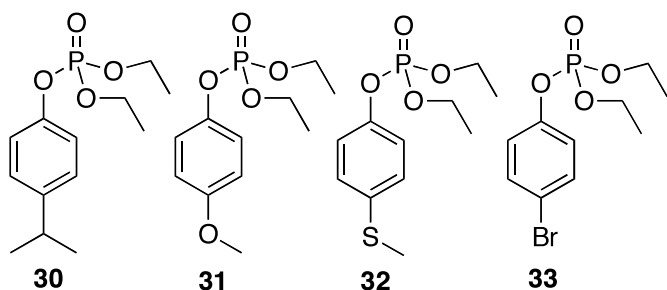

### Group IV

| Molecule  | <sup>1</sup> H NMR                                                                                                                                                    | <sup>13</sup> C NMR                                         | IR                                     | MS                                                        |
|-----------|-----------------------------------------------------------------------------------------------------------------------------------------------------------------------|-------------------------------------------------------------|----------------------------------------|-----------------------------------------------------------|
| <b>30</b> | 7.16 (2H, d, <i>J</i> 10Hz),<br>7.12 (2H, q, <i>J</i> 10Hz),<br>4.21-4.20 (4H, m),<br>2.89-2.88 (1H, m), 1.35<br>(6H, t, <i>J</i> 5Hz), 1.22<br>(6H, d, <i>J</i> 5Hz) | 148.7, 145.5,<br>127.5, 119.7,<br>64.5, 33.5,<br>24.1, 16.1 | 2956, 1602,<br>1507, 1282,<br>1216     | Calc (M+Na) <sup>+</sup><br>256.1075<br><br>Expt 256.1071 |
| <b>31</b> | 7.20 (2H, d, <i>J</i> 10Hz),<br>7.11 (2H, d, <i>J</i> 10Hz),<br>4.16-4.14 (4H, m), 2.41<br>(3H, s), 1.32-1.29 (6H,<br>m)                                              | 148.6, 134.7,<br>128.5, 120.5,<br>64.6, 16.6,<br>16.1       | 2981, 1490,<br>1218, 1030,<br>958, 772 | Calc (M+Na) <sup>+</sup><br>283.0711<br><br>Expt 283.0715 |
| <b>32</b> | 7.16 (2H, d, <i>J</i> 10Hz),<br>7.07 (2H, q, <i>J</i> 10Hz),<br>4.12 (4H, q, <i>J</i> 5Hz),<br>2.36 (3H, s), 1.28 (6H,<br>t, <i>J</i> 5Hz)                            | 148.5, 134.6,<br>128.3, 120.4,<br>64.5, 16.5,<br>16.0       | 2984, 1491,<br>1279, 1031,<br>883, 550 | Calc (M+Na) <sup>+</sup><br>299.0483<br><br>Expt 299.0488 |
| <b>33</b> | 7.43 (2H, d, <i>J</i> 10Hz),<br>7.10 (2H, q, <i>J</i> 10Hz),<br>4.21-4.17 (4H, m), 1.33<br>(6H, t, <i>J</i> 5Hz)                                                      | 150.1, 132.9,<br>122.0, 118.0,<br>64.9, 16.3                | 2988, 1485,<br>1218, 1030,<br>958, 834 | Calc (M+Na) <sup>+</sup><br>330.9711<br><br>Expt 330.9705 |

**30** <sup>1</sup>H NMR Spectrum

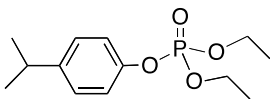

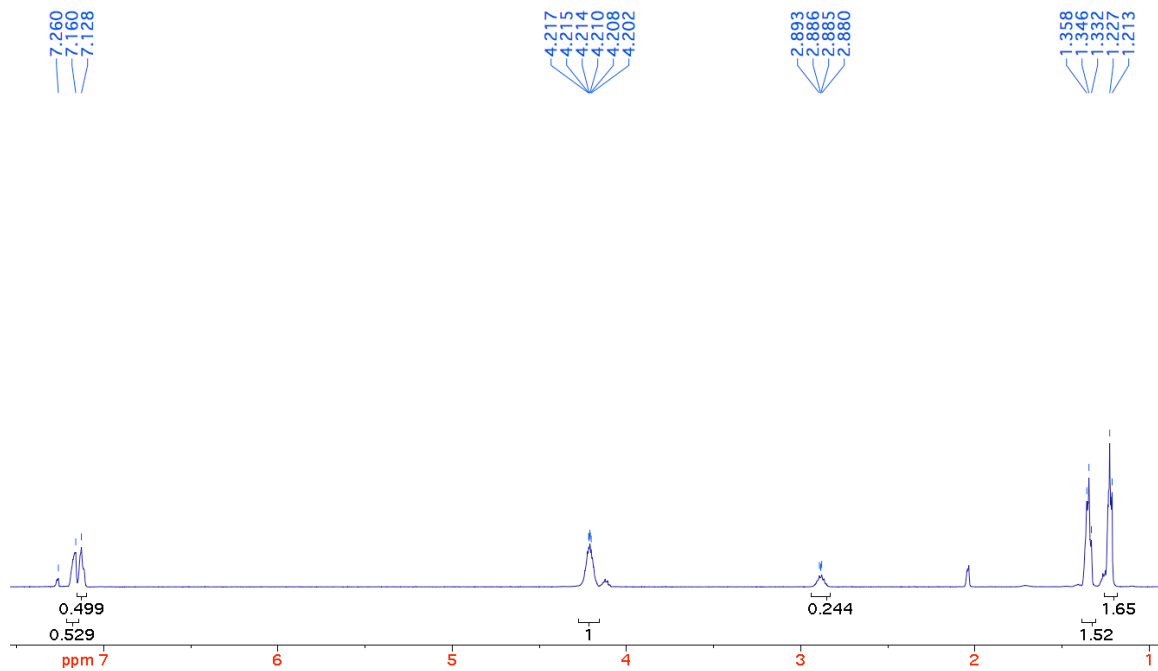

<sup>13</sup>C NMR Spectrum

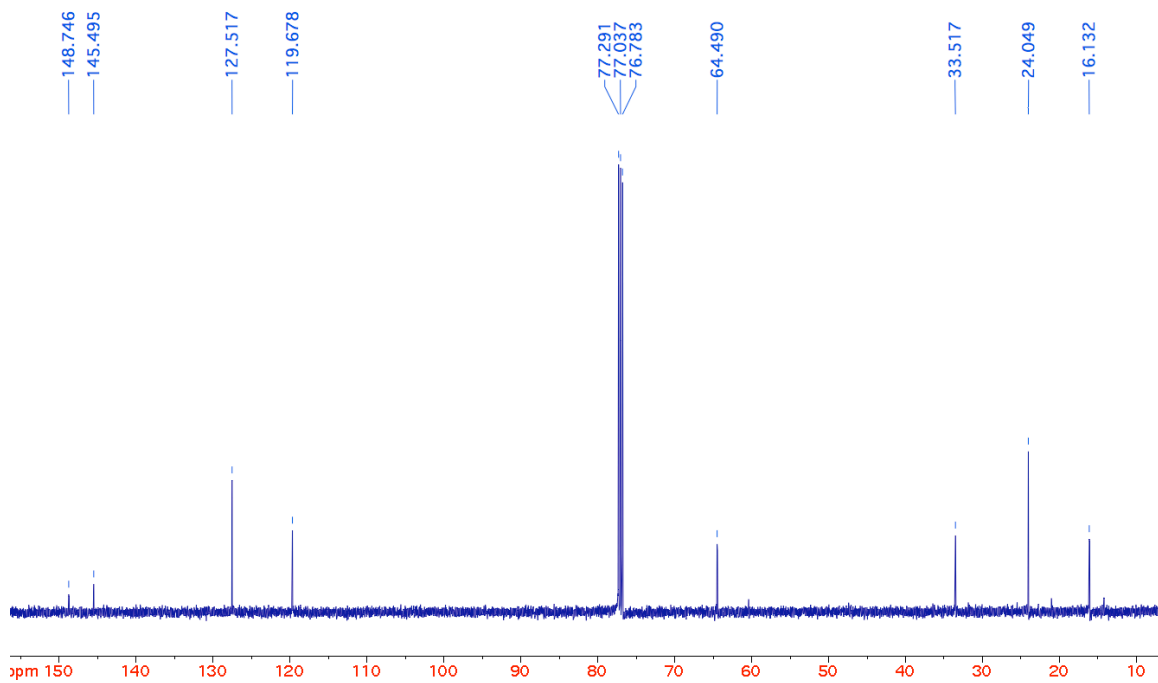

<sup>31</sup>P NMR Spectrum

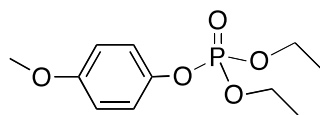

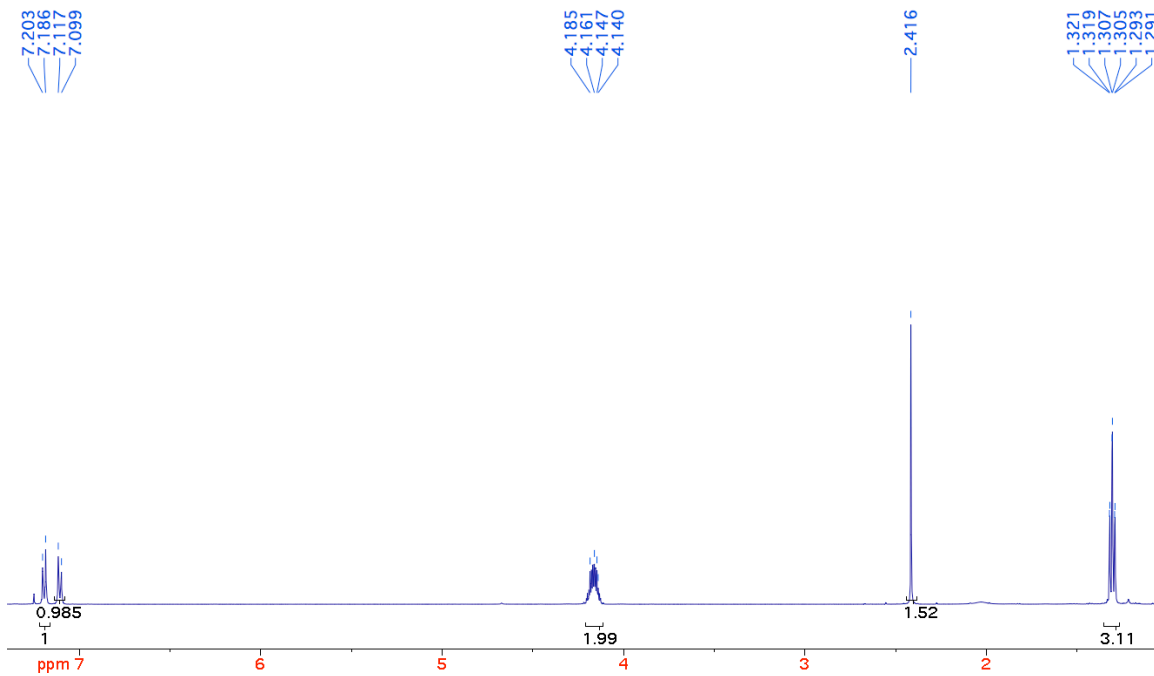

$^{13}\text{C}$  NMR Spectrum

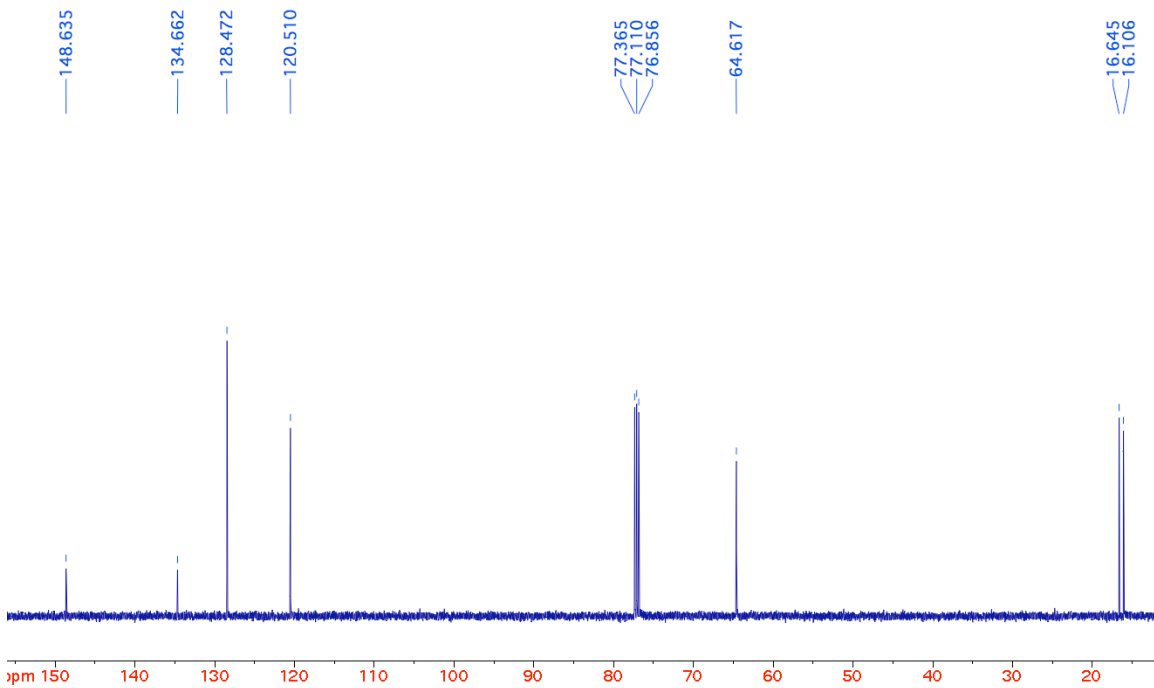

$^1\text{H}$  NMR Spectrum

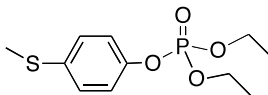

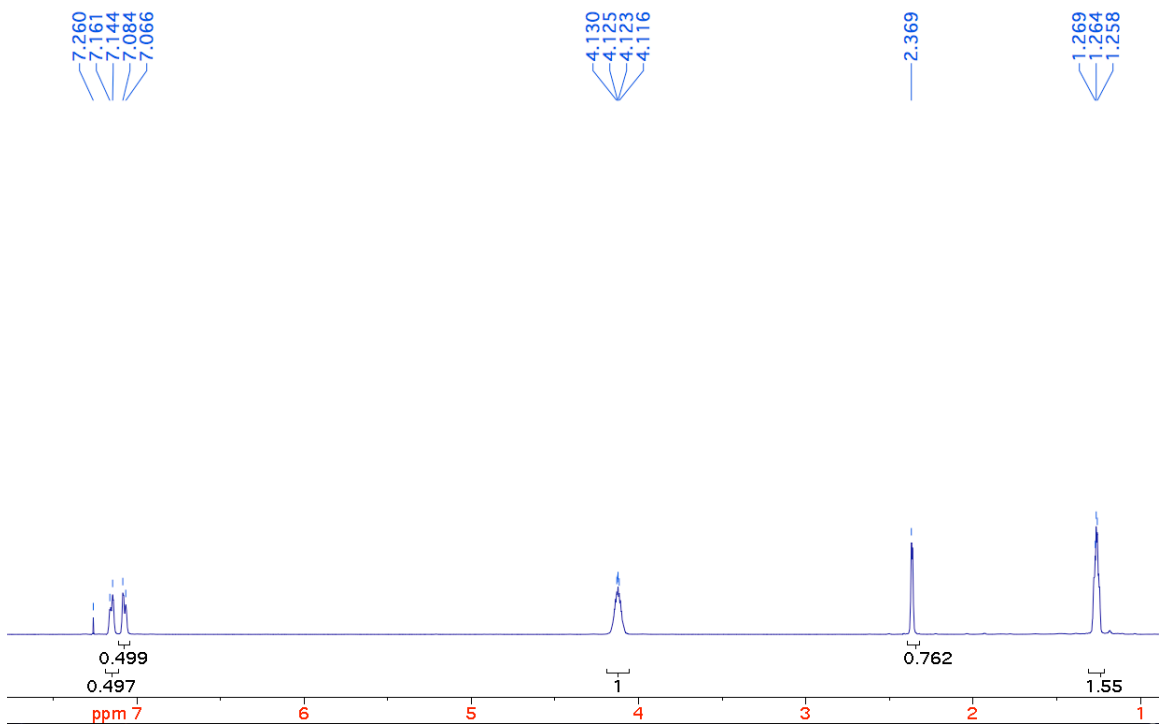

$^{13}\text{C}$  NMR Spectrum

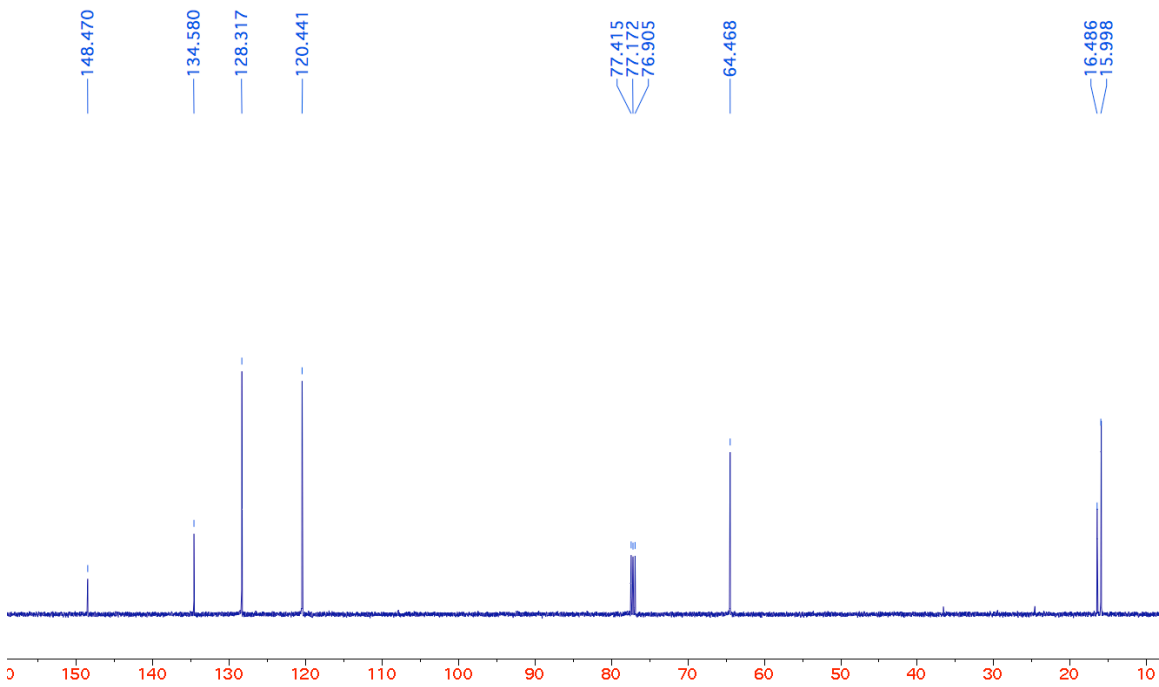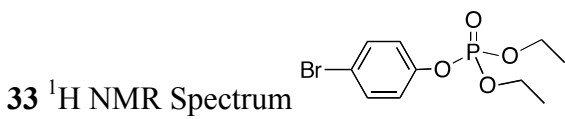

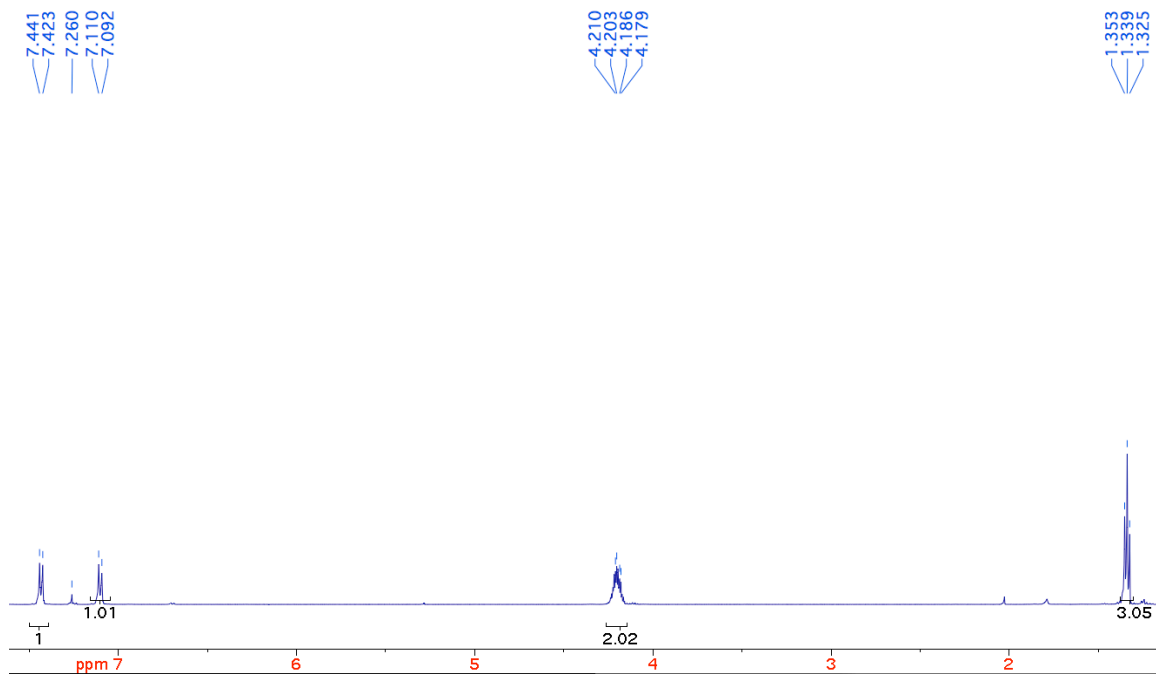

<sup>13</sup>C NMR Spectrum

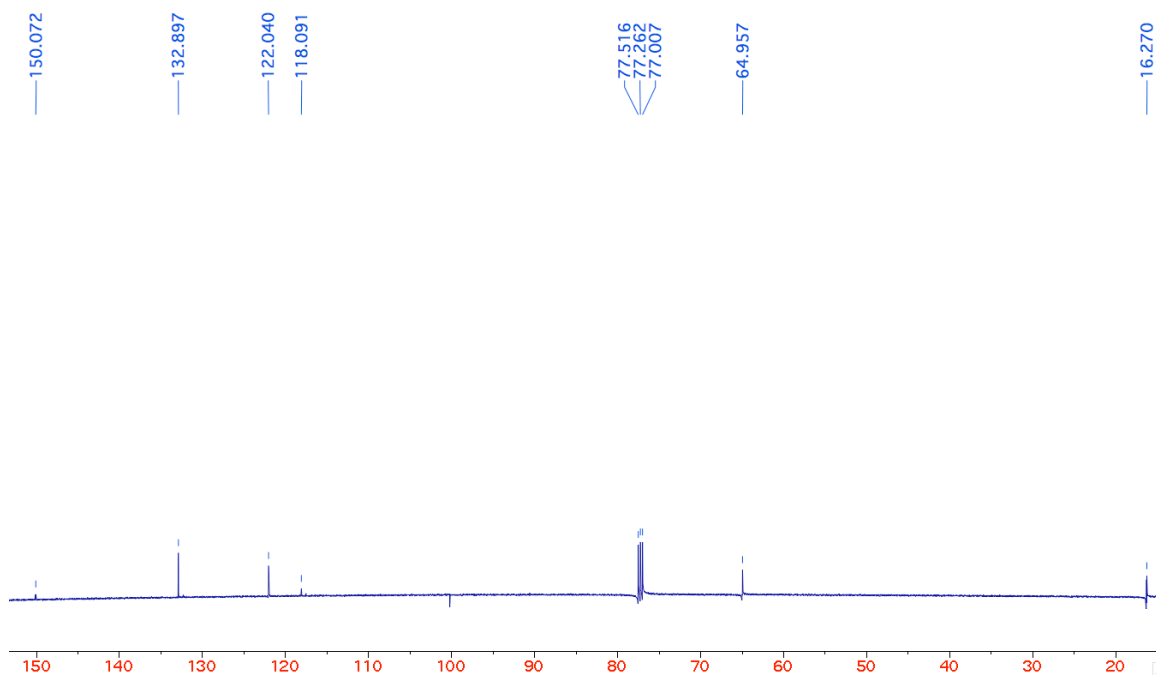

**Group V**

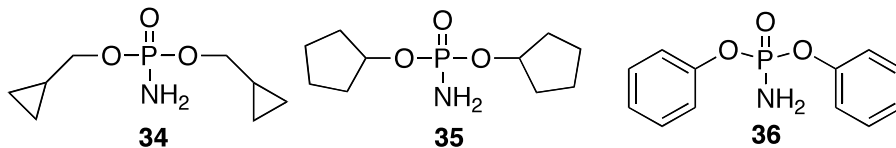

**34** and **35** were synthesized following a reported procedure and the two molecules are known DFPase inhibitors.<sup>3</sup> **36** is commercially available

| Molecule  | <sup>1</sup> H NMR                                                                                                                   | <sup>13</sup> C NMR | IR                                | MS                                                        |
|-----------|--------------------------------------------------------------------------------------------------------------------------------------|---------------------|-----------------------------------|-----------------------------------------------------------|
| <b>34</b> | 3.78 (3H, d, <i>J</i> 10Hz),<br>3.23(2H, s), 1.13-1.11<br>(2H, m), 0.52-0.50<br>(4H, d, <i>J</i> 5Hz), 0.25<br>(4H, d, <i>J</i> 5Hz) | 71.3, 11.2, 3.3     | 3343, 1567,<br>1226, 1039,<br>730 | Calc (M+Na) <sup>+</sup><br>228.0766<br><br>Expt 228.0767 |
| <b>35</b> | 4.85-4.84(2H, m),<br>2.95(2H, bs), 1.82-1.74<br>(10H, m), 1.57-1.56<br>(4H, m)                                                       | 79.6, 33.9,<br>23.1 | 3328, 2955,<br>1570, 1446,<br>990 | Calc (M+Na) <sup>+</sup><br>256.1078<br><br>Expt 256.1077 |

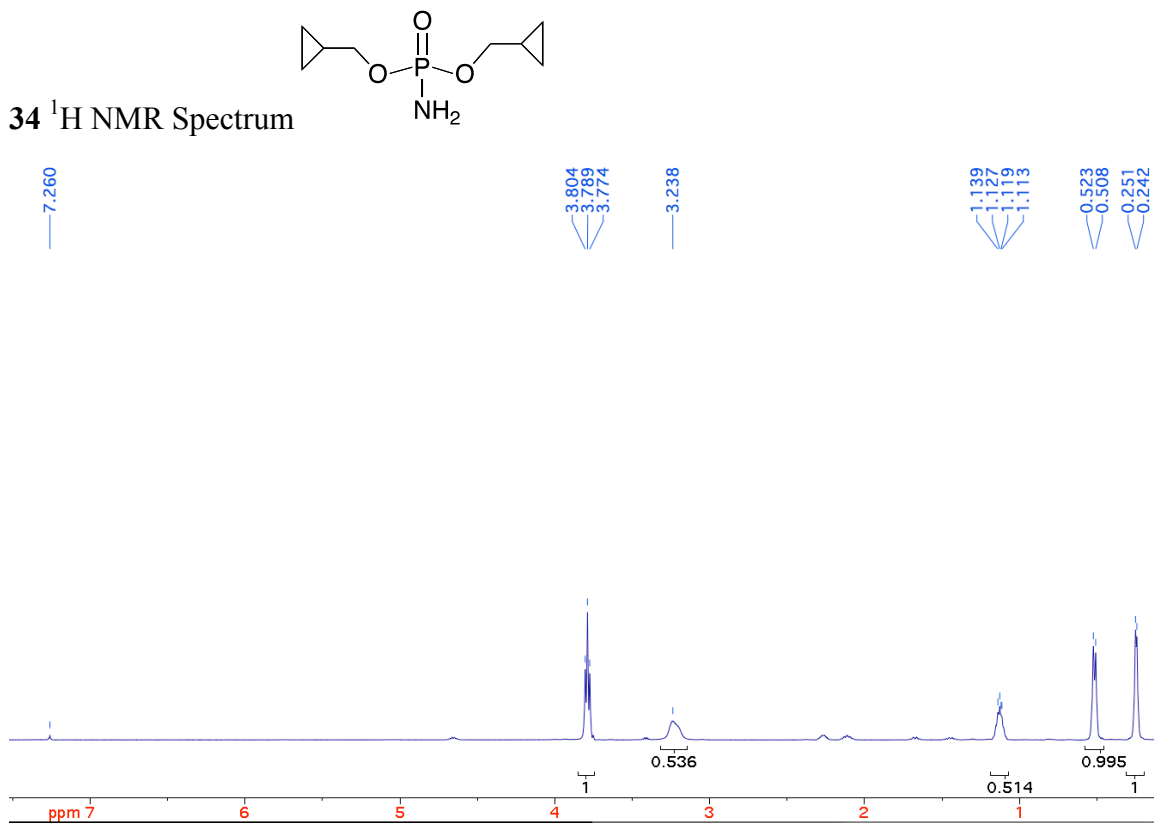

# <sup>13</sup>C NMR Spectrum

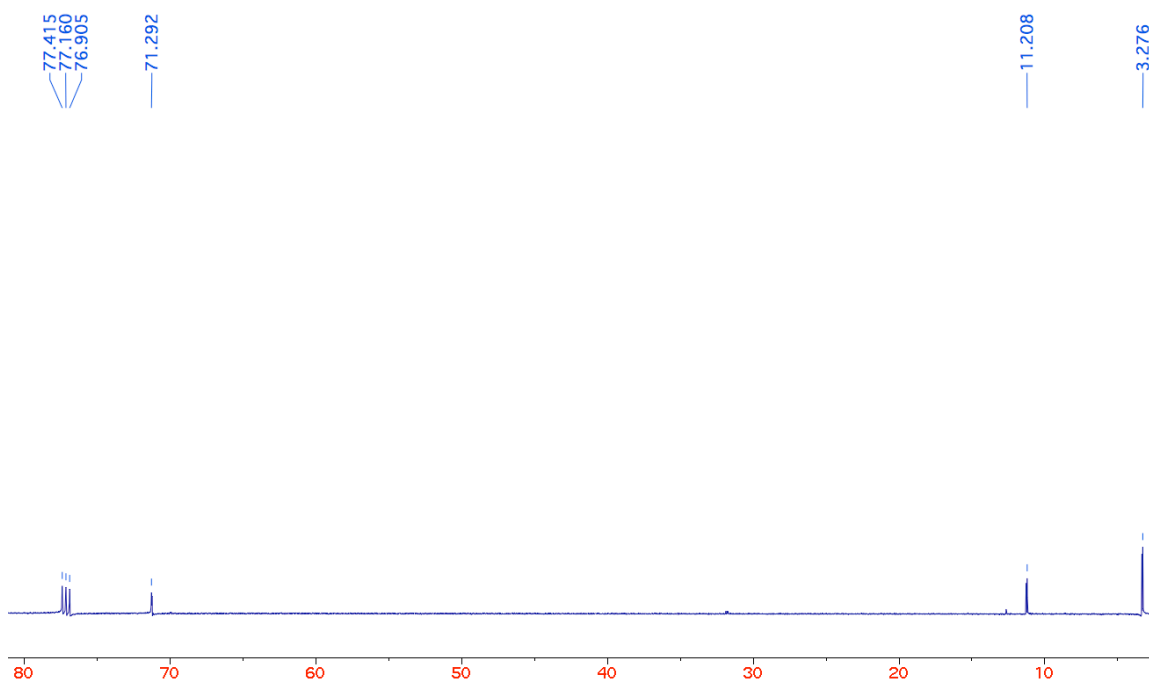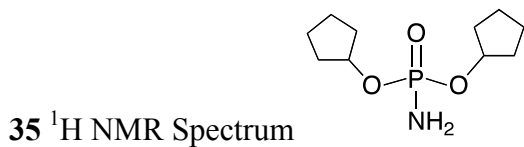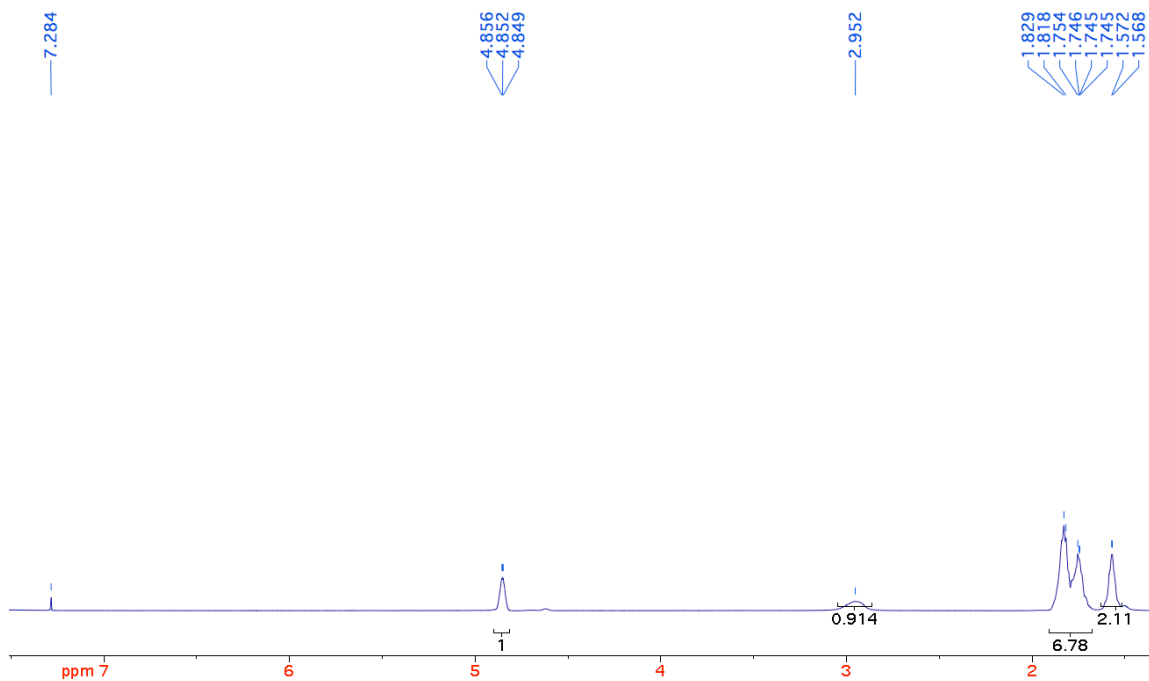



## <sup>13</sup>C NMR Spectrum

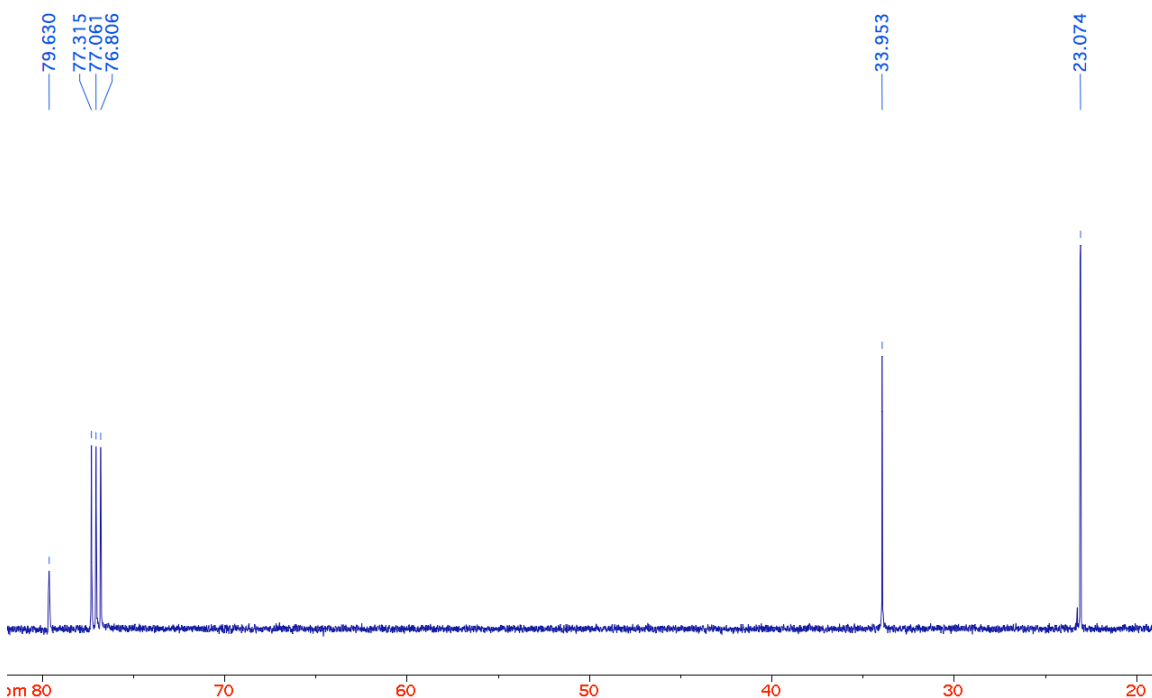

### 4. Details on Enzyme Preparation and determination of Enzyme Kinetics

*Expression and Purification of G2E6:* Briefly, plasmid encoding Trx-G2E6 fusion gene was expressed in Origami B(DE3) cells (Novagen, Madison, WI). The expression was carried out in 2YT culture media. The culture was grown at 37°C until OD<sub>600</sub> was reached at 0.8 when it was induced with 0.1 mM IPTG and expressed further for 3 hours at 30°C. The cells were then harvested by centrifugation and stored at -80°C until further use. The harvested cells were resuspended in lysis buffer [50 mM Tris-HCl pH 8.0, 50 mM NaCl, 1 mM CaCl<sub>2</sub>, 0.1 mM DTT, and 10% glycerol] and were passed through a syringe needle. The crude lysate was then sonicated and recovered further by incubation with 0.1% tergitol NP-10 (Sigma-Aldrich, St. Louis, MO) with shaking at 4°C for 2.5 hours. After centrifugation, Ni-NTA resin (Qiagen, Valencia, CA), pre-equilibrated with lysis buffer containing 0.1% tergitol NP-10, was added to the supernatant, and the mixture was shaken for 3 hours. The resin was then washed with activity buffer [50 mM Tris-HCl pH 8.0, 50 mM NaCl, 1 mM CaCl<sub>2</sub>, 0.1% tergitol NP-10, 10% glycerol] containing increasing concentrations of imidazole (5 mM, 10 mM, and 25 mM, respectively). The fusion protein was eluted with activity buffer containing 125 mM imidazole. The final elution was then dialyzed (10000 MW cutoff; slide-a-lyzer, Pierce, Rockford, IL) in activity buffer to remove imidazole and monitored on SDS-PAGE gel for homogeneity. The protein concentration was determined using a Bradford assay (Bio-Rad Laboratories, Hercules, CA).

*Determination of kinetic parameters:* The kinetic parameters ( $k_{cat}$ ,  $K_M$ ) were determined using a Michaelis-Menten plot as demonstrated for a reference substrate. Briefly, to

assay buffer [50 mM Tris-HCl pH 7.4, 1mM CaCl<sub>2</sub>], varying concentrations of substrates (paraoxon, 0.26 mM to 2.6 mM) and known concentration of enzyme (rePON1 G2E6) were added, and hydrolysis was monitored by UV-vis spectroscopy at 405 nm for 10 minutes. The rate of product (*p*-nitrophenol) formation was then plotted against substrate concentration and fitted to the Michaelis–Menten equation using KaleidaGraph. A typical curve is shown below.

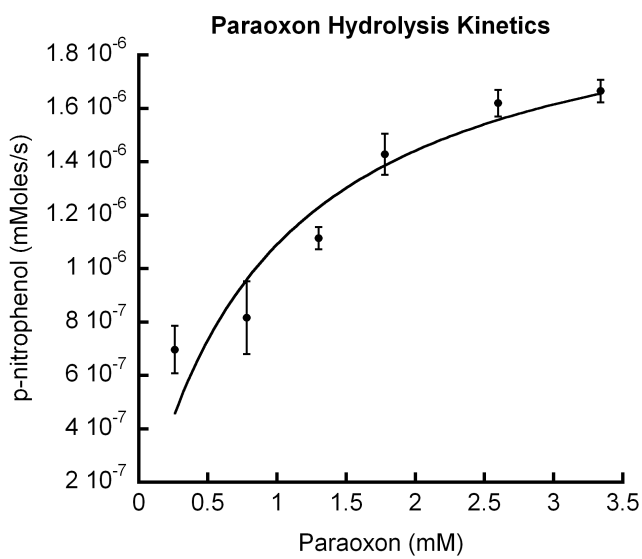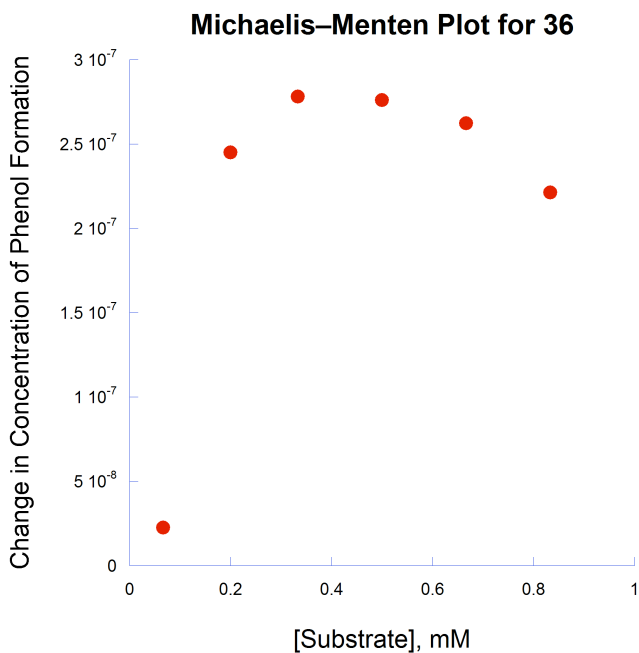

## 5. Selected Poses from docking of ligands in G2E6

In general, the docking poses obtained from Autodock revealed an adequate job of sampling ligand orientations in the active site. Both the leaving groups as well as the

other phosphoryl substituents were found to orient themselves into the various pockets comprising the active site region. However, a significant percentage of poses were found to result in the substrate not coordinating to the calcium ion owing to the vertical extension of the active site box. These were discarded from further refinement due to the lack of catalytic relevance, based on the assumption that calcium coordination to the phosphoryl oxygen is critical for catalytic activity.

The energy scores from the docking simulations were not a useful metric for determining the quality of the pose. Similar energy scores were obtained for poses that placed the phosphoryl oxygen in proximity to calcium and those that placed the ligand into the HDL binding domain of the protein. Moreover, treatment of electrostatic interactions, particularly on the leaving group, was not very reliable. In many cases, the nitro group was placed in highly nonpolar pockets without a significant energetic penalty relative to those that provided suitable hydrogen bond donors, for instance. The principal utility of the docking simulations, then, was on giving a series of poses for subsequent MD simulations. Representative poses from docking are shown below:

**Representative Docking Poses from Group I Molecules. All scores are in kcal/mol**

| Molecule     | Pose 1                                                                                                                                       | Pose 2                                                                                                                                         |
|--------------|----------------------------------------------------------------------------------------------------------------------------------------------|------------------------------------------------------------------------------------------------------------------------------------------------|
| Paraoxon (1) | 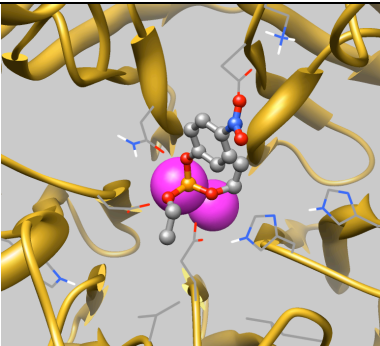 <p data-bbox="537 1289 753 1318">Docking Score: -9.1</p>  |  <p data-bbox="948 1289 1164 1318">Docking Score: -8.8</p>  |
| 8            |  <p data-bbox="537 1646 753 1675">Docking Score: -8.6</p> |  <p data-bbox="948 1646 1164 1675">Docking Score: -7.5</p> |
| 10           |                                                           |                                                            |

|  |                     |                     |
|--|---------------------|---------------------|
|  | Docking Score: -9.2 | Docking Score: -8.4 |
|--|---------------------|---------------------|

### Representative Docking Poses from Group II Molecules

| Molecule | Pose 1                                                                                                         | Pose 2                                                                                                          |
|----------|----------------------------------------------------------------------------------------------------------------|-----------------------------------------------------------------------------------------------------------------|
| 17 (65)  | 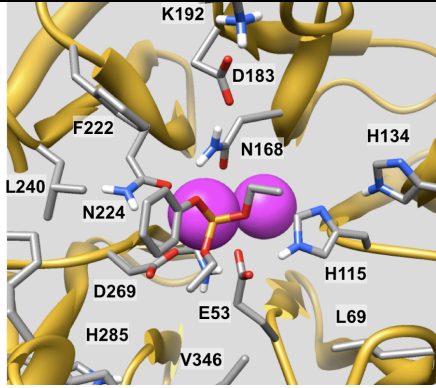 <p>Docking Score: -9.7</p>  |  <p>Docking Score: -9.4</p>  |
| 18 (120) |  <p>Docking Score: -9.1</p> |  <p>Docking Score: -7.5</p> |

### Representative Docking Poses from Group III Molecules

| Molecule | Pose 1                                                                                                          | Pose 2                                                                                                          |
|----------|-----------------------------------------------------------------------------------------------------------------|-----------------------------------------------------------------------------------------------------------------|
| 23 (131) | 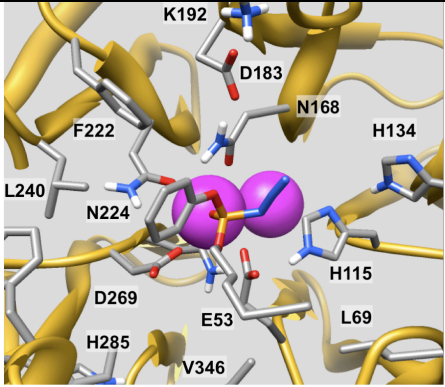 <p>Docking Score: -8.5</p>    |  <p>Docking Score: -8.0</p>   |
| 24 (118) |  <p>Docking Score: -9.6</p>   |  <p>Docking Score: -9.5</p>  |
| 25 (71)  |  <p>Docking Score: -10.0</p> |  <p>Docking Score: -9.1</p> |

### Representative Docking Poses from Group IV Molecules

| Molecule | Pose 1 | Pose 2 |
|----------|--------|--------|
|----------|--------|--------|

|                       |                                                                                                               |                                                                                                                |
|-----------------------|---------------------------------------------------------------------------------------------------------------|----------------------------------------------------------------------------------------------------------------|
| <p><b>30 (79)</b></p> | 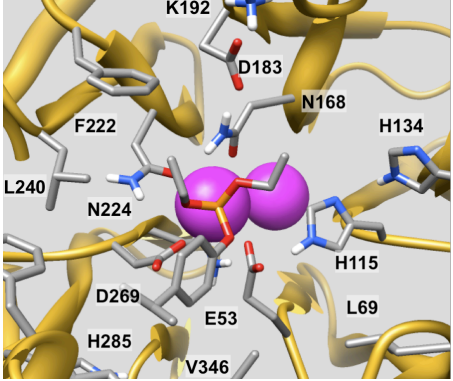 <p>Docking Score: -10.5</p> |  <p>Docking Score: -9.4</p>  |
| <p><b>31 (75)</b></p> |  <p>Docking Score: -9.2</p> |  <p>Docking Score: -7.1</p> |

**Representative Docking Poses from Group V Molecules**

| Molecule         | Pose 1                                                                                                          | Pose 2                                                                                                          |
|------------------|-----------------------------------------------------------------------------------------------------------------|-----------------------------------------------------------------------------------------------------------------|
| <p><b>36</b></p> | 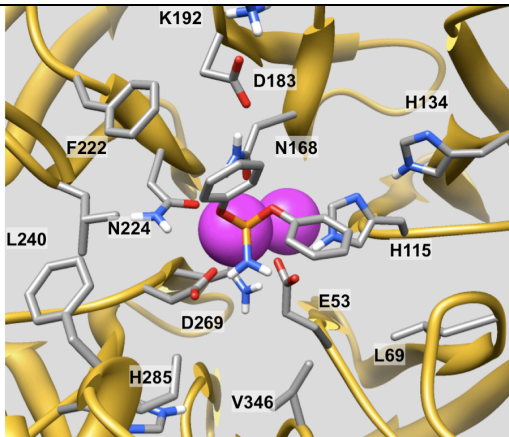 <p>Docking Score: -11.2</p> |  <p>Docking Score: -8.7</p> |

**6. Selected Poses from MD simulations of ligand-G2E6 complex**

After analysis of the various docking poses for different OP ligands bound into the active-site snapshots, subsequent MD simulations were performed on select calcium-bound receptor-ligand complexes obtained from the docking simulations. A similar minimization protocol was utilized as described for the initial G2E6 model; the only difference was the inclusion of a moderate, flattened parabolic restraint on the calcium-phosphoryl oxygen bond coordinate, from 2.5 to 4.0 Å, to allow for enhanced relaxation of the ligand-receptor contacts prior to the possible dissociation of substrate. This was found to improve on the sub-optimal treatment of receptor flexibility in the docking protocol, and resulted in a reduction in the number of dissociative poses. A total of 4 ns of unrestrained MD simulations were performed on each ligand-receptor complex. A series of coordinate snapshots was extracted from the production MD trajectory from the terminal 1.5 ns of simulations, at 10 ps intervals, from which individual trajectories were generated for the unbound ligand, free receptor, and complex. Poisson-Boltzmann (MM-PBSA)<sup>3</sup> and Generalized Born (MM-GBSA)<sup>4</sup> simulations were performed on these snapshots, using the *sander* module to calculate individual components of the free energy for each component as in eq 1. From the individual results, the overall free energy of binding was calculated using eq 2.

$$G = G_{\text{hyd}} + E_{\text{MM}} - TS_{\text{solute}} \quad (1)$$

$$\Delta G_{\text{bind}} = G_{\text{complex}} - (G_{\text{receptor}} + G_{\text{ligand}}) \quad (2)$$

The non-polar (SA) terms were estimated using the MSMS algorithm<sup>5</sup> using the equation  $G_{\text{SA}} = \gamma \text{SASA} + \beta$ , with  $\gamma$  and  $\beta$  set to 0.00542 kcal/(mol Å<sup>2</sup>) and 0.92 kcal/mol, respectively, and using a probe radius of 1.4 Å for estimating the solvent accessible surface area. For the polar ( $G_{\text{polar}}$ ) energy terms, the Generalized Born and Poisson-Boltzmann methods were both utilized as implemented in the AMBER software package. In the GB calculations, dielectric constants of 1 and 78.5 were utilized with AMBER mboni2 radii. The  $TS_{\text{solute}}$  term represents temperature and solute entropy, and in these calculations this term was omitted. As the binding energies were only compared within ligand families, the effect of entropy changes was estimated to be minimal. Such methods have been employed in estimating binding energies for organic molecules with good agreement with experimental data.<sup>6,7</sup>

### Group I

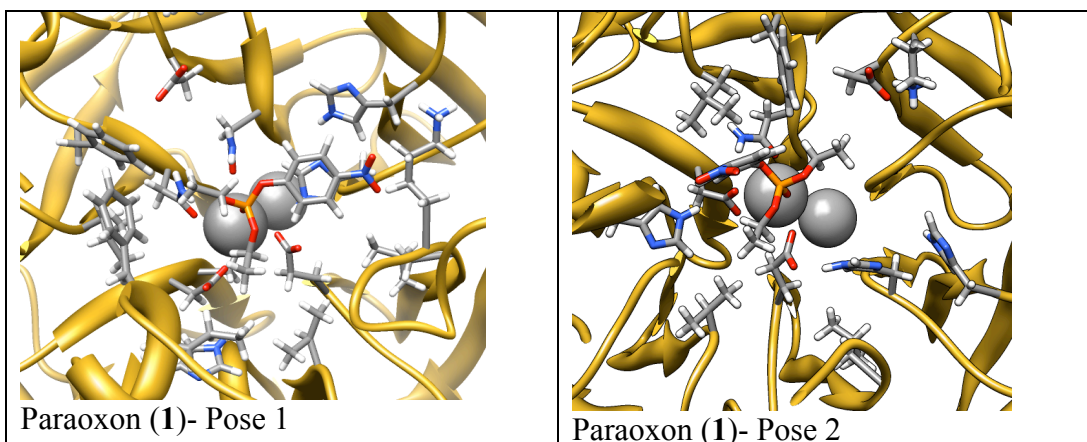

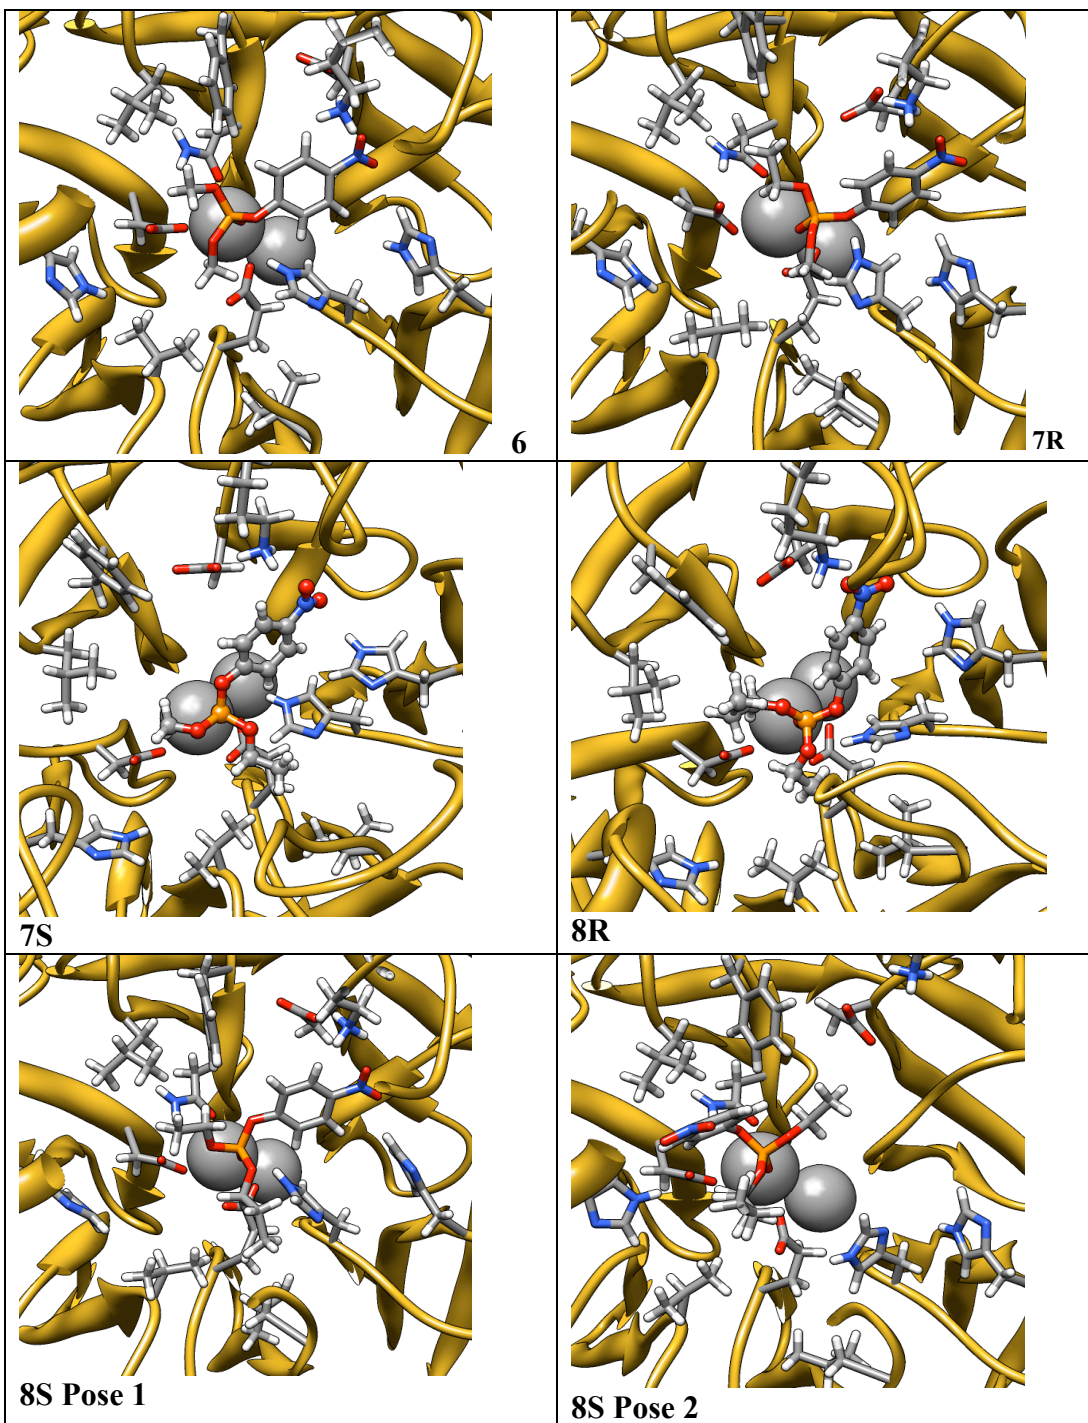



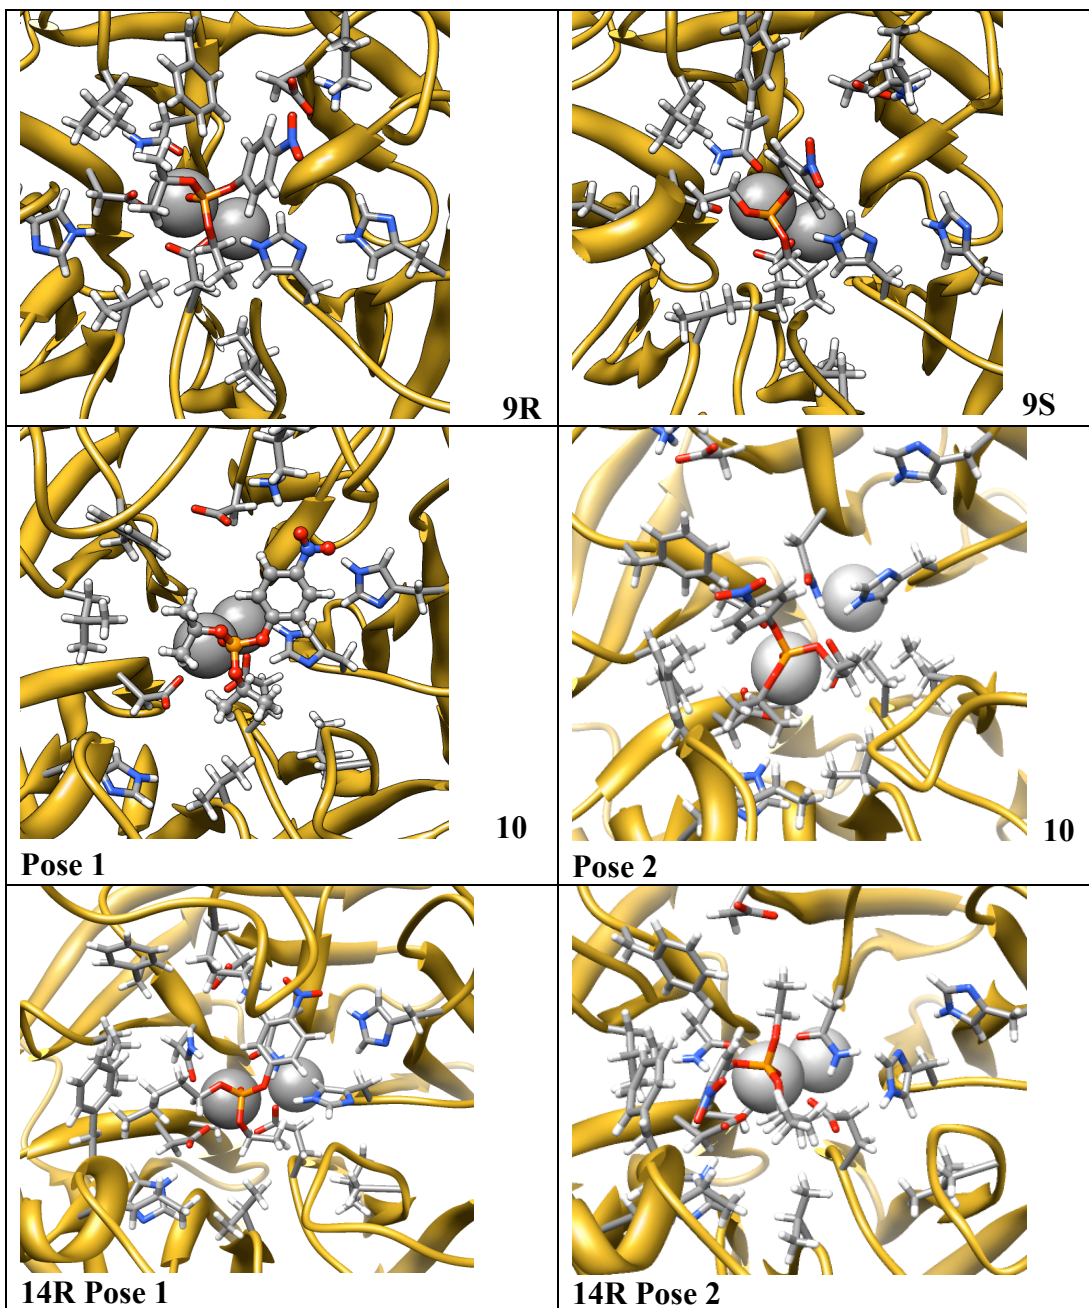

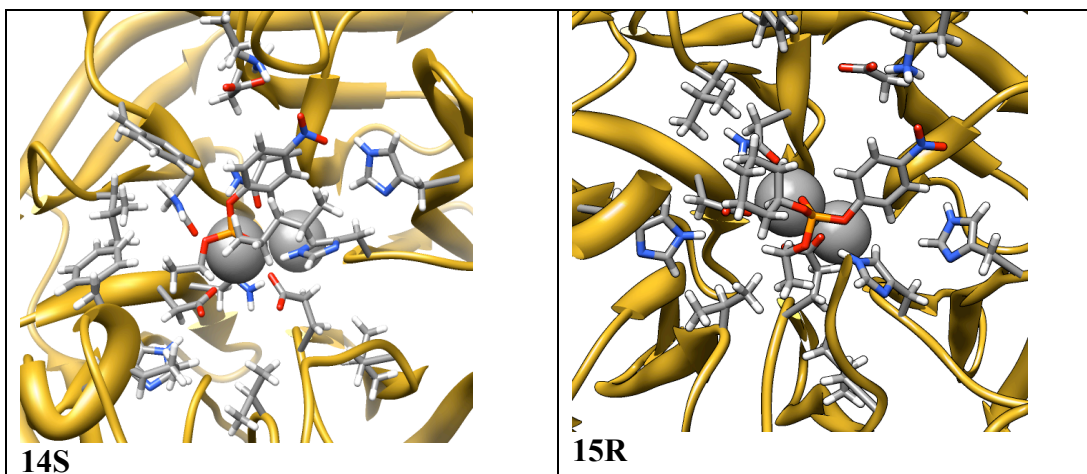

The energies obtained for poses of the group I molecules are shown in Table S1. The energy trend is consistently favorable for the orientation with the leaving group pointing toward the H115/H134/K192 region of the active site pocket.

**Table S1.** Energies determined for bound poses of the group I molecules bound in the G2E6 model of PON1, for the two primary orientations obtained. (MM-PBSA/MM-GBSA, respectively, in kcal/mol)

| Molecule:    | Leaving Group Orientation: |             |
|--------------|----------------------------|-------------|
|              | H115/K192 Pocket           | H285 Pocket |
| Paraoxon (1) | -17.5/-20.5                | -13.4/-17.9 |
| 6            | -13.4/-17.7                | a           |
| 7R           | -16.2/-20.8                | a           |
| 7S           | -14.6/-28.0                | a           |
| 8R           | -20.4/-23.1                | a           |
| 8S           | -22.8/-28.4                | -13.1/-21.1 |
| 9R           | -15.7/-19.7                | a           |
| 9S           | -20.1/-28.8                | a           |
| 10           | -19.1/-25.7                | -18.7/-20.3 |
| 14R          | -20.3/-33.4                | -15.1/-22.0 |
| 14S          | -18.6/-28.8                | a           |
| 15R          | -28.3/-31.5                | a           |

a - No pose determined in this pocket

## Group II

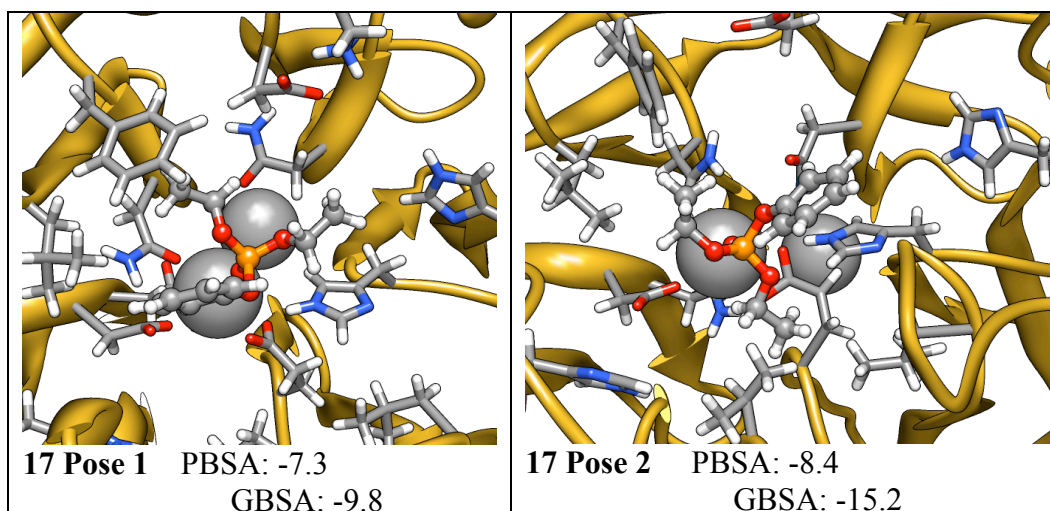

For the group II molecules, the lack of any electrostatic interactions with either pocket reduced the overall binding energies compared with paraoxon, but the poses do appear to be generally similar to those for the group I molecules.

### Group III

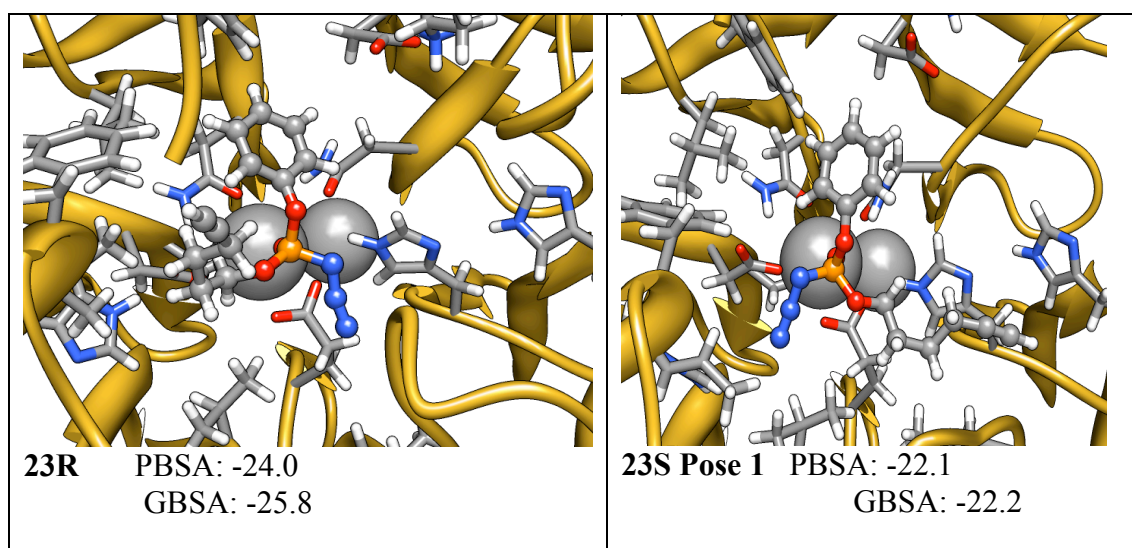

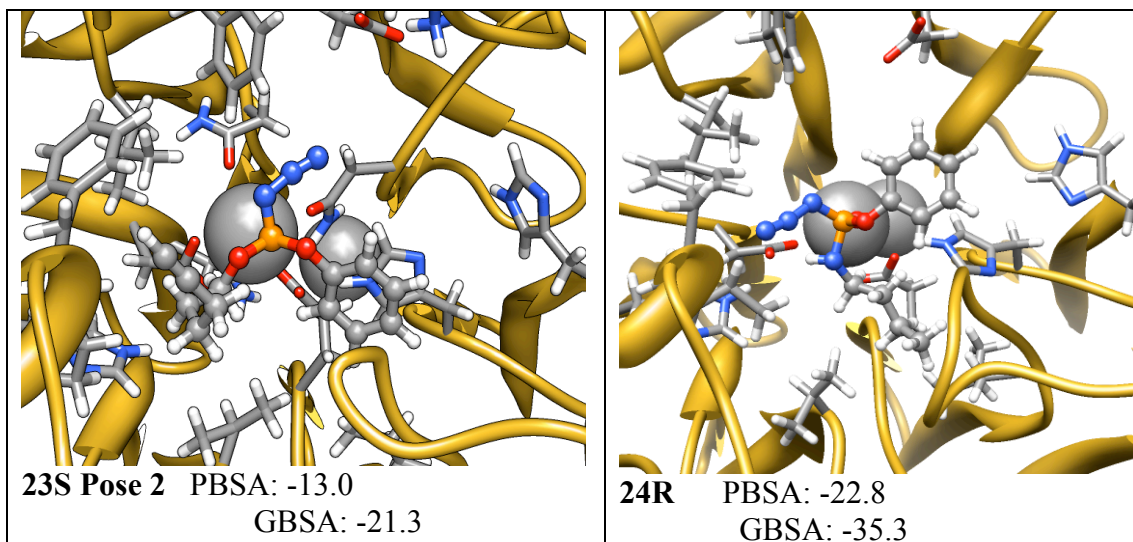

For the group III molecules the energetic preference was again similar, with electrostatic interactions observed between the azide and active site residues, specifically the aspartates and histidine 115. The leaving group is again positioned for hydrolysis by bases in proximity to D269 or E53.

#### Group V

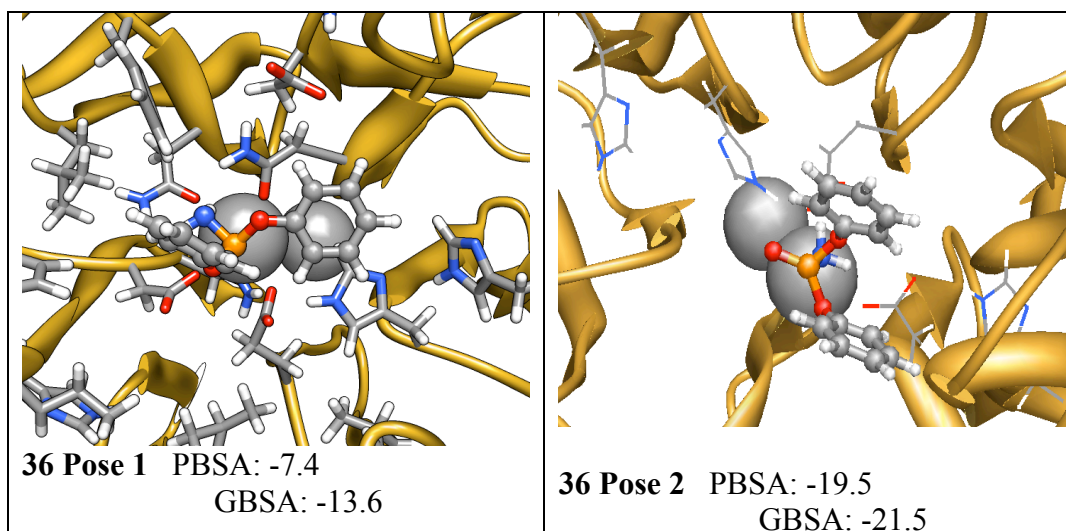

7. The  $\Delta H_{298, \text{hydrol}}$  for the hydrolysis of representative ligands from each group of molecules by water was computed using density functional theory (DFT – B3LYP/6-31G\*) using the Gaussian03 suite of programs.<sup>8,9</sup>

| Molecule      | Hydrolysis Products | $\Delta H_{\text{hydrol}}$<br>kcal/mol | Comment              |
|---------------|---------------------|----------------------------------------|----------------------|
| <b>1</b><br>  |                     |                                        | -6.9<br>Favorable    |
| <b>10</b><br> |                     |                                        | -6.8<br>Favorable    |
| <b>8</b><br>  |                     |                                        | -6.8<br>Favorable    |
| <b>9</b><br>  |                     |                                        | -6.6<br>Favorable    |
| <b>23</b><br> |                     |                                        | -4.9<br>Favorable    |
| <b>23</b><br> | HN <sub>3</sub>     |                                        | +11.4<br>Unfavorable |
| <b>24</b><br> |                     |                                        | -3.9<br>Favorable    |

|    |                                                                                     |                                                                                     |                                                                                      |       |             |
|----|-------------------------------------------------------------------------------------|-------------------------------------------------------------------------------------|--------------------------------------------------------------------------------------|-------|-------------|
| 24 | 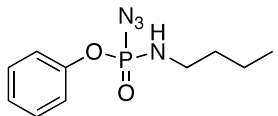   | HN <sub>3</sub>                                                                     |    | +12.6 | Unfavorable |
| 27 |    |    |    | -4.5  | Favorable   |
| 27 |    |    |     | -5.4  | Favorable   |
| 27 |    |    | HN <sub>3</sub>                                                                      | +12.1 | Unfavorable |
| 29 |   |   | HN <sub>3</sub>                                                                      | +11.6 | Unfavorable |
| 29 |  |  |   | -5.4  | Favorable   |
| 32 |  |  |  | -4.6  | Favorable   |

## 8. References

1. K. Law, R. A. Acey, C. R. Smith, R. Cameron, D. A. Benton, S. Soroushian, R. Eckenrod, R. Stedman, K. A. Kantardjief, K. Nakayama. *Biochem. Biophys. Res. Commun.* **2007**, 355, 371-378.
2. M. Blum, F. Löhr, A. Richardt, H. Rüterjans, G. C-H Chen *J. Am. Chem. Soc.* **2006**, 128, 12750-12757.
3. R. Luo, L. David, M. K. Gilson. *J. Comput. Chem.* **2002**, 23, 1244-1253.

4. J. Weiser, P. S. Shenkin, W. C. Still. *J. Comput. Chem.* **1999**, *20*, 217–230.
5. M. F. Sanner, A. J. Olson, J. Spehner. *Biopolymers* **1996**, *38*, 305-320.
6. R. C. Rizzo, T. Aynechi, D. A. Case, I. D. Kuntz. *J. Chem. Theory. Comput.* **2006**, *2*, 128-139.
7. B. Kuhn, P. Gerber, T. Schulz-Gasch, M. Stahl. *J. Med. Chem.* **2005**, *48*, 4040-4048.
8. (a) D. A. Becke. *J. Chem. Phys.* **1993**, *98*, 5648-5656. (b) C. Lee, W. Yang, R. G. Parr. *Phys. Rev. B* **1998**, *37*, 785-789.
9. Gaussian 03, Revision C.02, Frisch, M. J.; Trucks, G. W.; Schlegel, H. B.; Scuseria, G. E.; Robb, M. A.; Cheeseman, J. R.; Montgomery, Jr., J. A.; Vreven, T.; Kudin, K. N.; Burant, J. C.; Millam, J. M.; Iyengar, S. S.; Tomasi, J.; Barone, V.; Mennucci, B.; Cossi, M.; Scalmani, G.; Rega, N.; Petersson, G. A.; Nakatsuji, H.; Hada, M.; Ehara, M.; Toyota, K.; Fukuda, R.; Hasegawa, J.; Ishida, M.; Nakajima, T.; Honda, Y.; Kitao, O.; Nakai, H.; Klene, M.; Li, X.; Knox, J. E.; Hratchian, H. P.; Cross, J. B.; Bakken, V.; Adamo, C.; Jaramillo, J.; Gomperts, R.; Stratmann, R. E.; Yazyev, O.; Austin, A. J.; Cammi, R.; Pomelli, C.; Ochterski, J. W.; Ayala, P. Y.; Morokuma, K.; Voth, G. A.; Salvador, P.; Dannenberg, J. J.; Zakrzewski, V. G.; Dapprich, S.; Daniels, A. D.; Strain, M. C.; Farkas, O.; Malick, D. K.; Rabuck, A. D.; Raghavachari, K.; Foresman, J. B.; Ortiz, J. V.; Cui, Q.; Baboul, A. G.; Clifford, S.; Cioslowski, J.; Stefanov, B. B.; Liu, G.; Liashenko, A.; Piskorz, P.; Komaromi, I.; Martin, R. L.; Fox, D. J.; Keith, T.; Al-Laham, M. A.; Peng, C. Y.; Nanayakkara, A.; Challacombe, M.; Gill, P. M. W.; Johnson, B.; Chen, W.; Wong, M. W.; Gonzalez, C.; and Pople, J. A.; Gaussian, Inc., Wallingford CT, 2004.
